# Supplementary material for: Pharmahuasca Reduces ROS Production and inflammatory Gene Expression in the Brain in a Model of PTSD: Exploration by RNA Sequencing
Source: Research Square preprint supplement (doi:10.21203/rs.3.rs-602961/v1), 2021-06-15
Supplement: Supplementary file 1 [file 05d7da701833974296297b99.xlsx]

## Sheet: Sheet1
geneID	D2PFC11	D2PFC12	D2PFC14	D2PFC17	D2PFC18	D2PFC2	D2PFC21	D2PFC24	D2PFC27	D2PFC28	D2PFC3	D2PFC30	D2PFC5	D2PFC7	D2PFC8	D2PFC9
ENSRNOG00000000001	9	27	10	13	24	21	9	11	24	23	11	33	14	11	16	3
ENSRNOG00000000007	7694	3213	3052	5527	4382	3943	2097	3948	4268	3050	3721	6204	4026	3860	6017	4088		Control
ENSRNOG00000000008	18	33	5	65	21	28	8	3	24	12	19	39	20	7	37	39		PE/PSS
ENSRNOG00000000009	4	0	0	0	0	0	0	0	0	0	3	0	0	1	1	0		DMT
ENSRNOG00000000010	249	59	48	81	92	118	91	470	231	42	57	137	277	182	241	98		Harmaline
ENSRNOG00000000012	84	40	40	35	60	26	12	28	25	34	37	53	21	29	39	24		Pharmahuasca
ENSRNOG00000000014	882	493	532	506	677	604	456	553	410	466	475	534	413	621	1059	481
ENSRNOG00000000017	10	3	6	8	3	5	0	12	0	3	3	21	0	0	20	3
ENSRNOG00000000021	410	303	300	424	324	265	139	207	360	273	268	483	536	222	275	281
ENSRNOG00000000024	642	213	234	349	411	341	186	193	400	355	401	491	390	253	565	325
ENSRNOG00000000028	123	57	30	77	47	57	43	51	55	32	70	92	57	27	52	32
ENSRNOG00000000029	408	293	367	497	291	455	277	319	423	368	315	405	330	231	535	245
ENSRNOG00000000033	8740	5650	5358	7771	6949	7014	3614	6780	8113	6608	7340	9323	8213	5258	5004	5726
ENSRNOG00000000034	139	107	48	62	87	86	33	101	49	58	50	111	140	41	87	52
ENSRNOG00000000035	0	0	0	0	0	0	0	0	0	0	0	2	0	0	0	0
ENSRNOG00000000036	850	358	202	219	501	398	215	378	543	311	390	567	802	441	465	379
ENSRNOG00000000039	0	0	0	0	0	0	0	0	0	0	0	0	0	0	0	0
ENSRNOG00000000040	331	360	190	354	214	267	157	175	229	218	217	396	348	141	327	270
ENSRNOG00000000041	120	44	48	98	76	90	33	81	98	81	90	102	74	48	105	76
ENSRNOG00000000042	1199	900	811	1111	1215	651	606	961	1112	542	573	1244	935	875	592	1026
ENSRNOG00000000043	746	339	188	248	191	230	127	331	209	308	338	323	205	109	362	149
ENSRNOG00000000044	1583	679	605	784	668	727	354	658	797	630	755	903	1028	580	1110	612
ENSRNOG00000000047	1302	963	437	769	804	670	388	916	767	581	738	1210	773	627	895	561
ENSRNOG00000000048	2846	1513	1808	2164	2446	1812	1035	1452	2122	1868	1637	2261	1576	1487	2168	1758
ENSRNOG00000000053	0	0	0	0	0	0	0	0	0	0	0	0	0	0	0	1
ENSRNOG00000000054	11272	6976	6962	11123	6563	9912	4891	6655	9279	8539	8782	10685	11610	5410	10190	6162
ENSRNOG00000000055	2	0	0	0	0	2	0	0	2	0	0	0	0	0	0	0
ENSRNOG00000000060	18875	7398	9392	15409	9466	11282	5866	6674	11071	9179	9059	12846	14988	6943	15629	7338
ENSRNOG00000000062	410	414	401	451	472	274	253	282	465	352	246	499	371	351	318	389
ENSRNOG00000000064	1899	1032	736	1422	887	1053	814	733	1313	787	960	1194	1299	848	1874	984
ENSRNOG00000000065	3	3	2	7	3	1	7	1	0	10	0	4	0	1	2	0
ENSRNOG00000000066	535	464	325	561	565	332	250	341	485	395	343	631	397	261	443	411
ENSRNOG00000000068	2314	1028	876	1203	1238	1234	682	1182	1251	913	1275	1446	984	982	1865	866
ENSRNOG00000000070	0	0	0	0	0	0	0	0	1	0	0	0	0	0	0	0
ENSRNOG00000000073	597	256	129	175	331	406	270	551	134	102	333	300	277	208	298	170
ENSRNOG00000000075	460	219	224	226	297	204	148	242	181	299	249	218	275	230	279	152
ENSRNOG00000000081	75	100	14	84	41	59	26	39	41	20	33	65	52	20	48	44
ENSRNOG00000000082	1041	217	236	175	330	621	362	565	196	167	517	268	131	279	762	150
ENSRNOG00000000091	80	63	62	122	87	54	53	49	97	86	52	164	98	45	64	60
ENSRNOG00000000093	0	0	0	0	0	0	0	0	0	0	0	0	0	2	0	0
ENSRNOG00000000095	528	231	308	336	389	353	211	376	384	332	333	335	228	303	376	260
ENSRNOG00000000096	339	242	200	258	325	266	98	299	222	238	231	326	197	246	297	161
ENSRNOG00000000097	2	11	5	9	1	0	2	1	0	3	3	7	2	0	1	2
ENSRNOG00000000098	1101	669	699	991	835	873	490	689	870	606	722	1064	740	520	883	792
ENSRNOG00000000104	852	373	424	572	545	534	255	390	619	443	463	705	663	364	648	434
ENSRNOG00000000105	12818	12028	13404	20022	12799	12359	9400	9878	19323	9304	11786	16184	18261	10571	7372	13324
ENSRNOG00000000108	558	260	178	295	219	268	167	324	193	117	244	282	105	154	404	141
ENSRNOG00000000109	3	0	0	0	0	0	0	0	0	0	0	0	0	0	0	0
ENSRNOG00000000111	1115	654	385	637	513	702	342	773	594	580	537	724	690	423	938	492
ENSRNOG00000000112	1130	536	560	614	758	584	392	572	669	542	569	761	531	459	783	648
ENSRNOG00000000113	409	220	375	358	423	263	203	316	343	289	313	466	323	266	279	338
ENSRNOG00000000121	221	81	67	176	114	81	69	147	117	147	131	100	119	86	115	113
ENSRNOG00000000122	369	277	150	295	182	270	147	269	261	226	208	311	214	155	324	184
ENSRNOG00000000123	986	411	480	562	584	438	252	341	484	491	455	651	433	393	862	555
ENSRNOG00000000124	0	0	0	0	0	0	0	2	0	0	0	0	0	0	0	0
ENSRNOG00000000127	947	727	718	793	1069	585	361	748	848	627	656	862	622	610	545	976
ENSRNOG00000000129	9720	5040	7763	8386	8369	7030	3729	3506	8750	7790	6721	8460	7433	5105	7650	6142
ENSRNOG00000000130	3099	1186	1380	2031	1929	2297	909	893	1674	1844	1617	2630	2063	1202	3448	1512
ENSRNOG00000000133	1790	1451	1147	1589	1507	1500	810	1570	1406	1379	1507	2120	1455	1094	1359	1159
ENSRNOG00000000137	95	55	19	33	33	57	24	53	30	26	40	60	9	21	79	13
ENSRNOG00000000138	18	8	13	6	5	22	0	15	8	7	5	17	6	4	20	16
ENSRNOG00000000142	973	841	803	965	1032	643	534	908	987	645	550	960	772	669	644	824
ENSRNOG00000000145	399	277	222	339	335	291	282	324	310	214	281	330	274	254	310	234
ENSRNOG00000000146	66	5	10	6	30	20	22	33	9	35	30	37	1	23	30	14
ENSRNOG00000000147	4698	3613	3802	4472	4202	3879	2468	3613	4253	4321	4614	4360	3217	2584	3580	3260
ENSRNOG00000000150	270	191	142	172	135	254	131	157	150	196	238	172	156	122	272	112
ENSRNOG00000000151	684	882	389	594	745	429	301	799	555	466	427	788	703	434	336	421
ENSRNOG00000000155	740	372	312	333	415	422	221	409	313	324	466	438	231	302	474	260
ENSRNOG00000000156	1	15	9	4	15	3	1	7	9	0	7	5	6	0	1	2
ENSRNOG00000000157	2297	731	668	731	1022	1324	735	1231	755	821	1268	794	560	975	2082	646
ENSRNOG00000000158	1273	745	492	686	680	972	673	810	514	605	830	629	585	553	965	468
ENSRNOG00000000161	540	169	223	188	296	338	217	302	199	194	318	259	95	196	363	163
ENSRNOG00000000164	3070	1366	933	1342	1407	1589	1307	2023	1169	836	1600	1448	1215	1148	2040	1015
ENSRNOG00000000165	6	0	0	0	3	2	4	2	0	7	0	1	0	0	6	0
ENSRNOG00000000166	136	36	28	56	60	40	17	49	51	39	56	79	38	54	84	59
ENSRNOG00000000167	3	0	21	16	4	37	29	56	10	20	3	30	14	17	14	13
ENSRNOG00000000168	6283	4018	2013	4092	2975	4868	2734	5594	3209	2321	4464	4371	3380	2004	4712	1872
ENSRNOG00000000169	146	99	76	55	80	79	42	125	108	94	70	127	111	48	109	76
ENSRNOG00000000170	2603	978	1079	805	1326	1871	1237	1129	849	906	1741	799	647	1142	2163	745
ENSRNOG00000000172	149	75	42	99	83	87	45	68	56	35	84	94	45	56	115	56
ENSRNOG00000000175	905	428	322	416	380	429	200	333	438	502	395	509	622	271	517	294
ENSRNOG00000000177	226	112	58	112	109	95	45	98	91	151	89	152	174	63	135	78
ENSRNOG00000000184	41	47	35	67	30	27	15	38	29	17	49	36	23	21	20	18
ENSRNOG00000000185	783	405	262	378	346	412	180	374	343	329	355	522	488	242	658	274
ENSRNOG00000000186	2099	1013	594	1239	781	1072	584	1284	1039	675	832	1490	1304	656	1564	726
ENSRNOG00000000187	72	68	27	54	37	31	29	55	28	24	33	74	24	25	62	38
ENSRNOG00000000190	268	164	187	234	291	148	93	169	211	118	147	316	270	163	97	269
ENSRNOG00000000195	2	40	6	1	7	6	5	23	5	3	5	3	0	1	11	5
ENSRNOG00000000196	31	2	9	4	13	8	3	20	10	30	10	11	5	19	22	18
ENSRNOG00000000199	0	0	0	0	0	0	0	0	0	0	0	0	0	0	0	0
ENSRNOG00000000201	0	0	0	0	0	0	0	0	0	0	0	0	0	0	0	0
ENSRNOG00000000204	595	311	201	275	380	454	309	402	241	233	399	336	285	301	452	226
ENSRNOG00000000207	65	11	2	0	1	30	14	16	1	0	49	8	6	5	110	5
ENSRNOG00000000216	295	194	150	134	186	179	61	200	195	214	185	227	193	128	187	106
ENSRNOG00000000217	72	45	22	20	29	41	28	54	49	27	40	44	17	22	100	24
ENSRNOG00000000219	835	628	609	813	864	634	373	645	768	526	598	833	528	490	659	588
ENSRNOG00000000221	340	260	192	201	238	239	177	232	194	217	214	200	156	192	228	225
ENSRNOG00000000230	467	175	179	217	169	180	120	173	186	174	164	319	214	108	283	143
ENSRNOG00000000231	4270	1492	1613	2650	1626	2681	1256	1290	2037	2297	2110	2743	2893	1194	2653	1326
ENSRNOG00000000233	46	38	31	22	49	30	11	40	34	47	45	38	14	16	48	35
ENSRNOG00000000236	1908	664	608	752	903	935	576	837	712	521	907	990	557	635	1582	618
ENSRNOG00000000237	1167	673	939	643	987	733	631	886	787	687	859	833	504	690	759	744
ENSRNOG00000000239	3	0	0	0	0	3	0	0	0	0	5	2	0	0	3	0
ENSRNOG00000000242	1931	1360	1335	1707	2010	1075	821	1012	1832	1205	965	1905	1229	1158	1276	1487
ENSRNOG00000000244	395	207	263	250	305	289	158	191	255	188	288	336	286	184	298	244
ENSRNOG00000000245	196	107	118	139	84	204	81	160	115	213	179	164	144	101	114	91
ENSRNOG00000000246	3503	1606	1621	2085	2151	2115	1066	1552	1971	1855	1945	2509	1586	1727	2714	1639
ENSRNOG00000000247	742	424	309	379	373	374	208	318	403	405	366	505	346	269	494	296
ENSRNOG00000000248	3656	1420	1019	1370	1246	1642	844	1560	1216	1260	1566	1803	1878	1101	2362	985
ENSRNOG00000000249	255	67	64	107	83	126	55	54	89	38	77	100	65	46	224	61
ENSRNOG00000000250	376	169	146	185	176	207	104	170	188	187	178	269	187	129	308	153
ENSRNOG00000000251	1	0	3	2	3	3	0	3	0	0	1	0	0	1	0	0
ENSRNOG00000000252	0	0	0	0	0	0	0	0	0	0	0	0	0	0	0	0
ENSRNOG00000000257	4454	2317	2606	2555	2855	3176	1834	1886	4164	2656	2884	3605	5136	2942	1899	2453
ENSRNOG00000000258	1004	525	485	795	768	711	365	536	710	585	651	962	653	510	793	636
ENSRNOG00000000262	974	498	384	514	420	670	217	371	535	597	553	598	684	386	710	414
ENSRNOG00000000264	1073	656	576	714	727	562	374	572	688	694	662	901	716	540	810	516
ENSRNOG00000000274	4789	1972	1748	2392	2242	2219	1146	2232	2027	1637	1842	2961	1752	1855	3467	1896
ENSRNOG00000000275	1632	405	460	517	651	940	484	676	527	486	906	623	655	495	1490	338
ENSRNOG00000000277	64	131	57	51	87	39	34	103	68	47	38	99	27	49	54	83
ENSRNOG00000000279	639	213	222	369	301	361	118	267	304	276	308	408	295	235	413	232
ENSRNOG00000000281	1676	1261	544	908	627	1000	531	966	856	845	961	1207	859	450	989	523
ENSRNOG00000000282	0	3	0	0	0	0	0	0	0	0	0	0	4	0	0	0
ENSRNOG00000000283	591	215	362	462	368	364	226	276	461	351	328	474	502	259	414	240
ENSRNOG00000000288	432	364	152	340	153	250	141	251	304	290	203	265	386	174	241	161
ENSRNOG00000000296	0	4	0	0	0	0	0	0	0	0	0	0	0	0	0	0
ENSRNOG00000000297	1	0	0	0	0	3	0	0	0	0	0	2	0	0	1	0
ENSRNOG00000000299	945	1018	1304	1850	1503	735	772	653	1649	893	732	1732	1987	763	606	1335
ENSRNOG00000000302	1565	697	573	590	826	833	364	601	663	697	643	883	608	632	1253	561
ENSRNOG00000000303	132	71	46	61	72	62	38	67	55	51	63	110	58	39	84	49
ENSRNOG00000000304	3153	1019	629	790	987	1710	938	2092	643	561	1613	1039	786	997	2362	564
ENSRNOG00000000306	253	147	86	75	135	135	57	150	147	114	118	184	163	107	137	97
ENSRNOG00000000307	266	186	119	165	165	144	79	184	164	125	173	191	119	92	198	94
ENSRNOG00000000308	341	186	163	190	235	213	130	172	210	146	179	214	227	111	267	176
ENSRNOG00000000311	0	0	0	0	0	0	1	0	0	0	0	0	0	0	0	0
ENSRNOG00000000312	1812	1129	929	1124	1117	1222	766	900	1386	925	1003	1362	895	953	1360	926
ENSRNOG00000000314	3772	2097	1793	2125	2145	2641	1656	2417	1904	1801	2655	2439	1456	1834	2646	1605
ENSRNOG00000000315	0	0	0	0	0	0	0	0	0	0	0	0	0	0	0	0
ENSRNOG00000000316	2251	1718	1830	2051	2257	1910	1111	1439	1875	2002	2078	2542	2383	1588	1867	1600
ENSRNOG00000000320	0	0	0	0	0	0	0	0	0	0	0	0	0	0	2	0
ENSRNOG00000000321	2099	794	562	617	853	1136	713	1079	556	803	1124	772	395	610	1811	602
ENSRNOG00000000322	575	246	177	226	227	332	166	251	211	238	324	280	160	186	519	168
ENSRNOG00000000323	14	20	17	37	17	10	6	10	8	14	8	34	2	1	31	20
ENSRNOG00000000327	1849	714	1056	919	1312	1123	631	678	998	1049	1073	1242	1018	873	1515	864
ENSRNOG00000000335	9	11	1	2	1	0	0	6	3	4	1	2	19	1	2	0
ENSRNOG00000000340	1698	864	515	611	684	899	473	654	563	612	886	708	431	561	1367	544
ENSRNOG00000000341	156	213	42	134	94	106	47	42	125	44	120	113	168	50	202	76
ENSRNOG00000000345	0	0	0	1	0	0	0	0	0	0	0	0	1	0	0	0
ENSRNOG00000000368	1409	579	491	248	737	553	341	706	571	544	682	676	418	568	716	551
ENSRNOG00000000373	40	44	25	31	50	22	29	35	20	19	31	42	18	32	27	27
ENSRNOG00000000376	0	1	2	3	1	1	3	4	1	0	0	1	3	1	2	6
ENSRNOG00000000378	23	7	11	11	18	9	9	27	21	7	14	39	12	12	13	11
ENSRNOG00000000379	486	227	153	216	212	234	127	344	213	144	216	327	170	190	397	180
ENSRNOG00000000380	217	109	70	64	89	112	73	109	35	34	84	68	33	114	149	50
ENSRNOG00000000381	679	210	159	171	267	360	277	372	165	181	436	150	114	275	515	196
ENSRNOG00000000383	32	10	26	16	17	6	14	18	32	21	10	22	22	21	30	21
ENSRNOG00000000384	48	28	6	6	2	41	14	3	38	4	5	10	44	19	16	1
ENSRNOG00000000386	227	142	59	120	209	107	43	224	106	66	99	188	88	106	133	59
ENSRNOG00000000387	945	264	348	376	360	503	275	440	323	390	443	452	294	268	719	317
ENSRNOG00000000389	112	80	41	37	34	39	25	52	55	55	72	26	18	43	44	45
ENSRNOG00000000390	58	52	71	113	38	60	24	39	14	10	88	100	14	80	64	43
ENSRNOG00000000392	802	416	330	450	375	437	206	364	309	358	386	472	353	292	604	292
ENSRNOG00000000394	363	214	119	281	163	217	151	135	225	197	237	225	348	140	427	147
ENSRNOG00000000395	4075	1543	1913	2528	2553	2219	1163	1621	2148	1689	2121	2801	2135	1708	3269	1874
ENSRNOG00000000396	1052	377	376	306	498	717	410	539	303	455	647	400	266	456	886	275
ENSRNOG00000000397	1038	259	268	194	363	642	285	563	166	252	707	342	81	198	736	156
ENSRNOG00000000398	318	112	99	25	112	139	66	148	70	121	127	78	75	108	237	63
ENSRNOG00000000399	3023	1538	1589	1488	2300	2280	1500	1593	1402	1369	2004	1416	904	1482	2139	1472
ENSRNOG00000000401	0	0	0	0	0	0	0	0	0	0	0	0	0	0	0	0
ENSRNOG00000000402	0	0	0	0	0	0	0	0	0	0	0	0	0	0	0	0
ENSRNOG00000000403	0	0	0	0	0	0	0	0	0	0	0	0	0	0	0	0
ENSRNOG00000000404	0	0	0	0	0	0	0	0	0	0	0	0	0	0	0	0
ENSRNOG00000000405	5	0	0	0	0	0	1	0	0	0	0	0	0	1	0	4
ENSRNOG00000000406	14	9	8	7	4	5	11	10	5	8	18	6	0	3	13	0
ENSRNOG00000000407	120	79	41	75	61	62	5	99	52	69	59	93	57	61	86	81
ENSRNOG00000000408	2265	1096	1258	1238	1559	1408	1023	969	1311	1223	1274	1469	1367	1061	1726	1054
ENSRNOG00000000410	1	3	0	0	1	0	0	0	0	0	0	0	0	0	1	0
ENSRNOG00000000411	2916	1407	1397	1741	1626	2194	1149	1787	1474	1621	2101	1877	1722	1413	2479	1276
ENSRNOG00000000412	2996	806	710	650	1496	1386	979	1354	840	722	1145	946	540	1423	1672	731
ENSRNOG00000000413	34	6	8	15	6	12	9	7	9	4	2	24	23	6	24	8
ENSRNOG00000000414	166	120	155	121	129	74	80	104	101	79	108	88	69	60	47	117
ENSRNOG00000000415	552	229	176	281	240	396	201	397	251	189	330	348	307	191	404	203
ENSRNOG00000000417	3421	2823	2018	2712	3018	2134	1331	2547	2759	2357	2282	3526	3658	1773	2283	2310
ENSRNOG00000000418	206	154	111	154	148	146	109	180	136	150	159	182	209	115	161	102
ENSRNOG00000000419	0	0	0	0	0	0	0	0	0	0	0	0	0	0	0	0
ENSRNOG00000000420	981	442	443	584	551	683	306	571	618	577	614	848	689	397	852	457
ENSRNOG00000000421	1381	998	792	1052	1056	1003	476	762	1182	935	937	1397	1560	801	1038	891
ENSRNOG00000000422	250	140	74	154	77	109	63	75	124	131	95	169	216	75	182	93
ENSRNOG00000000423	5	3	13	11	2	8	1	0	6	2	4	18	13	2	4	4
ENSRNOG00000000428	6	0	5	4	5	14	2	2	8	7	10	8	7	5	7	2
ENSRNOG00000000431	2783	1249	1194	1796	1462	1624	828	1014	1592	1534	1293	2049	2363	1082	2026	1339
ENSRNOG00000000432	434	191	224	228	195	270	141	159	272	273	245	332	225	152	384	164
ENSRNOG00000000433	5707	2285	2352	2632	2803	3014	1267	2100	2538	2810	2471	3686	4123	2085	4556	2259
ENSRNOG00000000435	919	304	273	465	344	440	194	311	401	357	321	535	649	267	574	258
ENSRNOG00000000436	135	64	45	91	53	90	46	54	73	55	98	74	87	39	154	38
ENSRNOG00000000437	5842	3167	3419	4082	3832	4328	2040	3163	4368	4274	4028	5006	5316	3077	4984	3198
ENSRNOG00000000438	2811	1358	968	1596	1164	1557	881	1265	1613	1137	1298	2207	2095	1155	1874	1201
ENSRNOG00000000439	67	10	15	16	8	18	5	37	26	37	45	20	21	14	26	3
ENSRNOG00000000440	2317	1171	927	1346	1248	1338	743	1062	1270	1229	1423	1672	1747	977	1753	919
ENSRNOG00000000441	104	84	25	86	62	54	22	40	67	58	103	113	110	54	119	48
ENSRNOG00000000442	491	307	253	329	268	266	94	382	284	269	362	367	437	245	348	190
ENSRNOG00000000443	271	339	113	212	253	194	158	157	221	222	134	207	162	142	249	125
ENSRNOG00000000446	0	0	0	0	0	0	0	0	0	0	0	0	0	0	0	0
ENSRNOG00000000451	90	110	11	86	40	41	19	12	28	26	55	74	116	12	52	34
ENSRNOG00000000454	2	17	3	10	27	15	3	5	12	3	34	28	16	16	20	12
ENSRNOG00000000455	21	43	13	26	27	54	14	9	33	29	35	18	3	12	34	82
ENSRNOG00000000456	169	110	35	66	67	40	35	74	76	57	49	75	98	40	80	37
ENSRNOG00000000457	182	103	72	136	97	100	65	115	128	116	114	199	155	67	166	69
ENSRNOG00000000459	190	52	24	82	40	82	24	65	69	35	31	92	99	35	102	52
ENSRNOG00000000461	556	275	21	16	17	14	16	234	21	137	32	37	52	357	39	22
ENSRNOG00000000463	4907	2822	1355	1305	1129	2624	802	1981	1403	2885	3891	2187	1967	1047	2002	1051
ENSRNOG00000000464	2602	1201	1205	1776	1208	1550	773	928	1398	1375	1338	1845	2686	988	2031	1154
ENSRNOG00000000465	2663	1967	1685	2320	1962	2173	1086	1838	2276	1814	1952	2591	2677	1307	2148	1543
ENSRNOG00000000466	635	359	221	387	266	369	194	284	428	328	300	473	466	258	566	273
ENSRNOG00000000467	1030	893	671	973	758	920	486	635	859	872	903	1103	1482	618	801	763
ENSRNOG00000000470	2491	1424	1345	2218	2060	1844	749	926	1746	1800	1757	2637	2406	1085	1866	1340
ENSRNOG00000000471	130	60	53	46	66	69	36	55	112	79	61	77	174	69	87	43
ENSRNOG00000000473	1877	915	993	1469	1020	1610	783	1161	1250	1279	1446	1431	1585	952	1693	992
ENSRNOG00000000474	880	460	269	347	261	386	160	436	369	471	463	458	421	240	624	290
ENSRNOG00000000476	1226	754	877	1218	950	929	535	670	1053	967	869	1363	1278	708	966	742
ENSRNOG00000000477	764	391	317	379	481	489	243	391	480	404	426	654	512	320	612	325
ENSRNOG00000000478	0	0	0	0	0	1	0	2	0	0	0	0	0	0	1	2
ENSRNOG00000000479	70	63	19	21	17	31	6	15	39	41	16	46	57	35	39	28
ENSRNOG00000000480	1254	439	421	579	499	629	261	612	521	529	562	728	721	421	860	364
ENSRNOG00000000481	1605	567	496	925	575	730	337	493	773	528	588	1188	1472	487	1355	643
ENSRNOG00000000483	13465	10575	12945	15210	13189	11584	6845	7226	15229	12887	12715	16199	15970	9788	9329	12223
ENSRNOG00000000485	468	245	187	200	189	254	119	240	257	221	282	363	380	175	398	160
ENSRNOG00000000486	17	0	2	8	5	15	6	6	2	25	12	10	11	5	12	2
ENSRNOG00000000487	1057	456	464	643	598	641	298	325	780	667	546	688	1025	571	657	467
ENSRNOG00000000488	1193	726	635	999	820	938	421	820	860	702	880	1152	1318	636	1077	709
ENSRNOG00000000489	10522	6688	5707	8928	6751	8585	4605	6112	7640	6394	7241	8913	8589	5106	7991	5285
ENSRNOG00000000490	4468	2937	1853	3486	1976	2809	1339	2412	3018	1888	2515	4085	3766	1649	4098	2129
ENSRNOG00000000491	2	0	9	4	1	5	0	3	3	8	5	1	21	0	19	5
ENSRNOG00000000493	511	132	121	163	119	138	55	146	109	119	121	239	208	90	349	95
ENSRNOG00000000495	545	538	595	821	897	524	387	518	806	619	512	885	907	468	481	659
ENSRNOG00000000498	1340	1042	830	1126	922	879	476	1062	918	922	978	1236	1264	556	856	687
ENSRNOG00000000499	7	0	1	0	0	0	2	10	0	1	5	0	0	3	0	0
ENSRNOG00000000500	49	82	18	15	8	11	4	42	2	66	16	38	18	10	12	35
ENSRNOG00000000501	2503	1667	1705	2274	1518	2422	941	1675	2187	2196	2283	2337	2515	1331	1850	1520
ENSRNOG00000000502	48	18	19	48	32	32	17	13	29	28	24	25	66	12	51	20
ENSRNOG00000000503	1016	761	690	979	609	771	475	597	757	728	703	980	1063	341	1015	508
ENSRNOG00000000504	615	280	229	306	223	286	128	249	297	360	306	438	501	191	435	246
ENSRNOG00000000505	4340	2171	1726	2707	2361	3223	992	2590	2688	2031	2613	3812	2970	1888	4051	2047
ENSRNOG00000000506	88	91	28	65	48	59	29	89	44	36	63	67	44	35	66	50
ENSRNOG00000000507	0	0	0	0	0	0	0	0	0	0	0	0	0	0	2	0
ENSRNOG00000000508	0	0	0	0	0	0	0	0	0	0	0	0	0	0	0	0
ENSRNOG00000000510	1	0	0	0	0	0	0	0	0	0	0	0	4	0	1	0
ENSRNOG00000000511	1218	880	897	923	1127	812	486	671	820	790	874	1161	1048	794	942	789
ENSRNOG00000000512	555	294	356	330	339	351	184	209	312	433	393	362	251	266	455	269
ENSRNOG00000000513	2209	1367	1183	1481	1384	1468	701	1058	1517	1512	1295	1925	1651	1049	1752	1149
ENSRNOG00000000515	1	0	0	1	0	1	0	2	0	0	2	3	0	1	4	0
ENSRNOG00000000516	0	0	0	0	0	0	0	0	0	0	0	0	0	0	0	0
ENSRNOG00000000517	408	386	282	285	400	291	190	282	363	305	274	472	387	274	331	425
ENSRNOG00000000519	751	514	274	349	258	442	201	429	292	420	460	440	404	285	510	325
ENSRNOG00000000520	3710	1384	992	1503	1462	2046	1212	1856	1317	1249	2088	1887	817	1227	3153	1055
ENSRNOG00000000521	201	231	73	172	196	122	75	151	155	125	125	363	160	83	262	161
ENSRNOG00000000522	7381	2944	2784	3306	3632	3535	1805	2102	4420	3301	3118	5057	5728	3548	4399	3357
ENSRNOG00000000523	789	289	228	387	275	385	107	321	285	285	337	483	378	272	646	232
ENSRNOG00000000524	1440	875	805	914	1016	1185	462	771	1017	841	866	1221	672	663	1204	828
ENSRNOG00000000525	314	168	89	98	100	99	58	184	159	64	139	154	202	136	172	109
ENSRNOG00000000527	18494	10084	8743	12103	11966	11886	5500	10383	13668	11282	10359	16780	16823	9337	14519	9480
ENSRNOG00000000528	194	169	85	113	104	121	76	172	156	87	169	191	122	65	186	85
ENSRNOG00000000529	66	61	32	37	50	62	8	48	56	48	65	94	87	39	45	44
ENSRNOG00000000531	168	104	64	127	75	89	55	67	87	86	101	136	153	75	122	74
ENSRNOG00000000532	2996	1772	1463	2124	2007	1701	981	1692	1967	1691	1575	2497	1964	1326	2175	1617
ENSRNOG00000000534	1429	669	765	790	869	915	334	690	929	913	845	1088	826	635	1029	652
ENSRNOG00000000536	353	370	274	311	282	285	149	329	402	262	228	468	536	300	312	310
ENSRNOG00000000539	2957	1726	1342	1814	1664	2144	1095	1804	1801	1478	1993	2457	1954	1403	2239	1335
ENSRNOG00000000540	1040	784	950	1083	1118	863	569	653	1136	794	866	1070	789	641	669	886
ENSRNOG00000000541	2983	1427	1222	1314	1487	2292	1016	1764	1179	1301	1831	1522	903	1355	2975	1192
ENSRNOG00000000542	21	5	5	3	12	10	9	6	7	23	11	23	4	10	14	6
ENSRNOG00000000543	13	10	1	7	4	5	19	5	10	2	14	3	0	6	15	0
ENSRNOG00000000545	4	12	1	0	0	1	0	2	7	2	0	12	0	2	0	0
ENSRNOG00000000546	257	44	52	52	39	140	78	121	70	74	165	81	57	58	191	39
ENSRNOG00000000547	5268	2995	3781	4992	5031	3479	2164	3251	4509	3028	3182	5072	4896	2985	3953	3506
ENSRNOG00000000549	6094	2810	2969	4200	3890	4026	2544	3050	3691	2756	3770	4383	4020	2969	4914	2952
ENSRNOG00000000551	1229	383	483	669	474	690	229	430	645	524	581	835	700	376	1123	379
ENSRNOG00000000552	86	83	67	112	13	92	26	20	80	92	60	52	142	20	74	36
ENSRNOG00000000554	0	6	0	0	0	1	0	0	0	0	1	1	0	1	0	1
ENSRNOG00000000555	556	485	353	539	519	420	316	648	561	336	450	728	585	342	417	449
ENSRNOG00000000556	2	0	0	0	3	0	0	0	0	0	0	0	16	1	0	0
ENSRNOG00000000557	4505	2449	2215	2782	2772	2847	1627	2398	2664	2648	2756	3564	2632	2206	3827	2003
ENSRNOG00000000558	1598	790	700	837	871	1065	459	823	710	661	944	1093	709	784	1536	696
ENSRNOG00000000559	13	50	10	5	28	6	1	43	6	0	9	20	19	15	3	9
ENSRNOG00000000560	393	146	244	259	258	327	124	241	317	272	221	359	311	221	403	183
ENSRNOG00000000561	309	288	134	232	229	203	102	317	159	177	193	274	281	141	263	205
ENSRNOG00000000562	13	8	7	7	4	20	1	6	22	18	19	24	3	0	13	8
ENSRNOG00000000563	9	14	12	3	12	13	5	0	23	7	18	13	38	9	13	19
ENSRNOG00000000564	13	0	2	7	0	4	1	0	5	1	2	0	4	1	7	0
ENSRNOG00000000565	631	455	271	299	304	309	175	445	302	345	324	426	161	216	311	274
ENSRNOG00000000566	209	21	44	63	70	105	42	201	71	62	101	142	75	70	213	79
ENSRNOG00000000567	1011	832	566	924	990	561	308	981	728	480	535	1132	1391	498	534	591
ENSRNOG00000000568	439	401	190	275	299	312	195	405	373	291	439	401	389	196	280	245
ENSRNOG00000000569	1656	1241	643	1313	865	1012	687	1090	1060	693	905	1362	921	719	1086	886
ENSRNOG00000000571	53134	23885	21569	34735	29883	26615	16166	23831	31778	22005	22300	43578	33515	20445	39085	21684
ENSRNOG00000000572	65	42	31	61	58	24	36	45	54	53	55	60	67	27	32	42
ENSRNOG00000000573	9682	6920	8223	10708	9987	6666	4173	5853	10371	8391	6624	11110	13107	6971	8365	7728
ENSRNOG00000000574	0	0	0	0	0	0	0	0	0	0	0	0	0	0	0	0
ENSRNOG00000000575	459	234	171	320	212	262	130	205	232	163	244	348	183	190	391	178
ENSRNOG00000000576	281	64	54	97	60	124	50	98	76	113	120	70	30	85	227	67
ENSRNOG00000000577	1597	1233	553	905	660	942	573	758	822	738	810	1358	1790	671	1530	979
ENSRNOG00000000579	3538	1326	959	1588	1648	2098	1127	2823	1798	816	2048	2533	3168	1313	2525	1412
ENSRNOG00000000580	33	23	20	25	21	11	16	17	18	18	21	28	8	11	20	14
ENSRNOG00000000581	885	324	326	486	391	494	258	384	420	337	391	492	325	394	693	399
ENSRNOG00000000582	302	173	212	289	215	172	92	143	224	257	172	266	162	128	206	239
ENSRNOG00000000583	3373	1908	2272	2436	2197	2452	1689	1737	2132	2210	2228	2253	1454	1777	2562	1897
ENSRNOG00000000585	5168	2382	2313	2391	2587	3336	1974	2633	2184	2130	2766	2395	1170	2309	4589	1829
ENSRNOG00000000586	561	349	273	309	387	413	287	427	266	290	475	382	192	293	384	235
ENSRNOG00000000587	582	177	195	118	182	340	188	239	98	238	365	102	12	205	428	109
ENSRNOG00000000588	16	7	1	8	18	5	1	10	11	1	5	13	7	2	6	10
ENSRNOG00000000589	17	5	12	0	7	16	8	8	13	9	14	7	6	13	14	4
ENSRNOG00000000590	0	0	0	0	0	0	0	0	0	0	1	0	0	0	1	0
ENSRNOG00000000593	1435	765	843	567	954	938	602	1040	645	752	948	692	399	917	960	738
ENSRNOG00000000595	88	34	17	14	13	29	8	28	22	14	18	35	4	19	46	13
ENSRNOG00000000596	4909	2612	2191	3304	2644	2985	1699	2506	2676	2217	2592	3702	2778	1866	4089	2216
ENSRNOG00000000597	9	4	0	0	0	0	0	4	0	2	3	8	8	1	6	0
ENSRNOG00000000598	98	80	34	39	32	42	20	57	56	37	47	69	69	39	54	60
ENSRNOG00000000599	432	471	279	358	330	304	151	266	377	381	297	383	292	199	404	309
ENSRNOG00000000604	2352	773	764	838	1000	1217	755	896	814	798	1025	1005	864	926	1861	841
ENSRNOG00000000605	203	84	95	113	173	188	99	93	147	78	139	136	130	104	209	97
ENSRNOG00000000606	342	190	164	140	160	109	97	204	184	145	213	169	95	91	171	196
ENSRNOG00000000607	0	0	0	0	0	0	0	0	0	0	0	0	0	0	0	0
ENSRNOG00000000609	980	522	523	644	762	677	368	636	678	535	734	722	399	562	789	545
ENSRNOG00000000610	2144	887	798	1307	1057	1250	600	1011	1066	929	1070	1442	1440	867	1865	871
ENSRNOG00000000611	260	190	145	165	221	127	53	163	162	120	109	235	323	138	203	103
ENSRNOG00000000613	795	371	291	321	373	500	281	440	323	280	462	405	329	311	694	261
ENSRNOG00000000614	116	176	52	84	70	66	60	33	107	82	76	91	70	45	99	87
ENSRNOG00000000618	274	178	198	149	340	189	153	259	152	126	199	244	70	259	202	204
ENSRNOG00000000620	0	0	0	0	0	0	0	0	0	0	0	0	0	2	0	0
ENSRNOG00000000621	0	0	0	0	0	0	0	0	0	0	0	0	0	0	0	0
ENSRNOG00000000622	2768	1459	929	1605	1195	1674	839	1381	1346	874	1365	2174	1812	1231	2696	1170
ENSRNOG00000000626	0	0	0	0	0	0	0	0	0	0	0	0	0	0	0	0
ENSRNOG00000000630	0	0	0	0	0	0	0	0	0	0	0	0	0	0	0	0
ENSRNOG00000000632	21	12	6	3	10	6	1	8	3	8	3	16	1	10	26	3
ENSRNOG00000000633	260	100	96	165	155	154	88	140	143	169	115	183	165	80	215	82
ENSRNOG00000000634	348	198	113	183	164	239	149	360	121	153	245	189	53	124	260	50
ENSRNOG00000000635	530	376	407	581	609	356	259	340	575	334	244	733	430	362	245	371
ENSRNOG00000000636	108	70	64	63	92	62	32	37	88	55	45	81	90	44	67	66
ENSRNOG00000000638	12344	8173	9978	12335	9187	10377	6090	6930	11859	9019	9994	11876	9740	6697	8093	7708
ENSRNOG00000000639	258	338	303	430	365	297	175	148	397	287	200	375	548	247	192	206
ENSRNOG00000000640	53	155	14	42	77	106	63	14	14	111	98	337	130	22	126	123
ENSRNOG00000000641	342	179	172	310	219	260	170	138	208	208	193	311	287	142	304	210
ENSRNOG00000000645	1138	689	497	642	793	645	515	1141	554	433	675	792	418	534	635	545
ENSRNOG00000000648	2312	1231	1255	1370	1640	1176	912	1324	1183	1057	1372	1580	900	1057	1369	1248
ENSRNOG00000000650	0	0	0	0	0	0	0	0	0	0	0	0	0	0	0	0
ENSRNOG00000000651	0	0	0	0	0	1	0	0	0	0	0	0	0	0	0	0
ENSRNOG00000000653	0	0	0	0	0	1	0	3	1	0	0	1	0	0	1	0
ENSRNOG00000000655	192	73	46	56	67	66	82	133	45	38	96	60	62	37	147	65
ENSRNOG00000000656	0	0	0	0	0	0	0	0	0	0	0	0	0	0	0	0
ENSRNOG00000000657	956	760	623	751	798	762	649	973	792	519	715	854	686	646	515	617
ENSRNOG00000000658	226	214	88	156	101	128	66	267	148	110	208	154	59	86	78	59
ENSRNOG00000000660	2192	1145	1051	1473	1056	1350	668	620	1465	1470	1241	1399	1845	718	1689	929
ENSRNOG00000000661	911	482	261	296	290	349	163	374	322	440	387	480	456	199	523	266
ENSRNOG00000000662	195	96	116	150	141	98	76	124	172	134	103	232	149	75	168	125
ENSRNOG00000000663	1465	799	669	1001	942	797	412	769	962	816	859	1214	1178	705	961	745
ENSRNOG00000000664	914	391	327	576	374	506	253	429	550	447	447	702	614	347	568	371
ENSRNOG00000000665	2396	1429	1207	1492	1378	1933	1286	1517	1229	1450	1841	1531	908	1141	2002	1179
ENSRNOG00000000691	0	0	0	0	0	0	0	4	0	0	0	1	0	0	0	0
ENSRNOG00000000692	107	60	38	47	55	82	45	51	55	66	54	113	36	66	75	61
ENSRNOG00000000693	4692	2990	3820	4210	4754	3883	1820	2632	4880	4622	4061	5525	5644	3136	4128	3879
ENSRNOG00000000694	11	18	8	0	6	13	0	14	1	17	9	10	3	8	5	5
ENSRNOG00000000695	240	286	222	287	326	188	151	233	269	284	248	335	430	164	124	249
ENSRNOG00000000697	3451	1897	1950	2510	2733	2173	1293	1877	2386	2390	1951	3337	2815	1916	2681	2002
ENSRNOG00000000699	1526	1062	584	1113	749	846	483	1329	1101	462	855	1336	1063	604	1202	654
ENSRNOG00000000700	753	702	406	726	387	580	217	882	798	251	481	947	684	367	885	508
ENSRNOG00000000701	3063	1317	1024	2070	1420	1663	852	1623	1568	1364	1430	2170	2015	1281	2528	1231
ENSRNOG00000000702	1277	693	653	734	886	660	393	564	920	820	674	1049	962	564	890	607
ENSRNOG00000000703	457	399	310	408	439	331	167	299	427	327	311	511	576	263	276	328
ENSRNOG00000000704	130	151	63	85	78	124	81	75	138	133	67	149	95	78	72	80
ENSRNOG00000000705	867	445	519	560	556	630	289	317	772	513	550	727	1297	653	450	512
ENSRNOG00000000708	3911	1940	2159	2498	3189	2195	1193	2492	2997	2612	2166	3265	2973	1966	2353	2052
ENSRNOG00000000711	384	354	374	436	474	277	141	162	405	343	239	481	524	201	284	238
ENSRNOG00000000713	30	25	16	20	51	56	31	75	18	6	57	8	15	46	27	9
ENSRNOG00000000715	2	2	0	0	0	2	6	3	0	3	3	0	0	3	2	0
ENSRNOG00000000716	37	20	35	14	27	25	17	18	17	14	27	15	4	14	36	25
ENSRNOG00000000718	1403	300	348	452	470	889	539	861	408	249	806	495	369	399	1201	417
ENSRNOG00000000720	167	91	75	61	89	143	60	108	75	27	117	85	172	105	125	60
ENSRNOG00000000723	177	147	63	104	78	114	52	136	119	54	85	178	121	64	209	69
ENSRNOG00000000726	0	0	0	0	0	0	0	0	0	0	0	0	0	0	0	0
ENSRNOG00000000728	32	21	5	4	6	18	12	10	4	6	21	4	0	9	32	0
ENSRNOG00000000729	178	116	69	92	71	92	52	133	74	57	87	91	54	63	121	67
ENSRNOG00000000741	0	0	0	0	0	0	0	0	0	0	0	0	0	0	0	0
ENSRNOG00000000746	0	0	0	0	0	0	0	0	0	0	0	0	0	0	0	0
ENSRNOG00000000747	0	0	0	3	0	0	0	0	0	0	0	0	0	0	0	0
ENSRNOG00000000748	54	61	28	24	46	45	60	47	37	33	36	6	8	35	82	33
ENSRNOG00000000749	0	0	0	0	0	0	0	0	0	0	0	0	0	0	0	0
ENSRNOG00000000759	0	0	0	0	0	0	0	0	0	0	0	0	0	0	0	0
ENSRNOG00000000763	300	146	115	189	181	143	97	113	177	173	171	227	146	111	256	162
ENSRNOG00000000765	0	0	0	0	0	0	0	0	0	0	0	0	0	0	0	0
ENSRNOG00000000767	0	0	0	0	0	0	0	2	4	1	1	1	0	0	0	0
ENSRNOG00000000768	0	0	0	0	0	0	0	0	0	0	1	0	0	0	2	0
ENSRNOG00000000774	37701	24196	24591	29884	29087	27026	17562	24697	31823	24565	26088	35859	28544	22114	25971	24776
ENSRNOG00000000775	3070	1809	1112	1281	1975	1285	661	2009	1039	1300	1291	1537	1087	1075	1890	838
ENSRNOG00000000777	503	410	240	655	573	421	194	477	464	562	527	722	508	346	563	356
ENSRNOG00000000778	93	42	26	13	40	63	17	59	29	48	46	33	17	49	58	42
ENSRNOG00000000779	199	72	62	108	63	75	46	62	91	63	77	108	61	36	165	35
ENSRNOG00000000780	2786	1194	1034	1662	1522	1549	763	1222	1555	1206	1232	2031	1550	1188	2481	1214
ENSRNOG00000000781	302	265	209	268	316	254	215	145	222	321	303	364	294	184	366	160
ENSRNOG00000000782	0	0	0	0	0	0	0	6	4	4	1	0	0	1	0	0
ENSRNOG00000000783	0	0	0	0	0	2	0	0	0	0	0	0	0	0	0	0
ENSRNOG00000000785	478	229	198	217	236	236	186	249	196	257	272	307	166	200	322	168
ENSRNOG00000000786	384	136	100	178	77	147	67	115	114	122	85	251	259	87	362	91
ENSRNOG00000000787	11	16	6	7	10	7	14	13	21	22	22	7	21	4	22	1
ENSRNOG00000000790	5	0	4	6	4	6	1	0	0	0	0	12	4	2	2	0
ENSRNOG00000000795	664	296	392	132	132	221	94	348	102	192	238	162	244	83	232	135
ENSRNOG00000000796	3356	1327	1471	630	2161	2402	1718	1974	667	936	2406	597	357	1718	2460	1117
ENSRNOG00000000798	6048	4674	4072	5441	4254	5205	3089	4148	5503	5304	5288	6070	5967	3687	5059	4065
ENSRNOG00000000799	3255	2032	2144	2807	2166	2674	1584	2043	2517	2436	2403	2782	2057	1640	2827	1992
ENSRNOG00000000800	957	379	372	319	623	410	213	340	581	384	517	730	535	459	485	559
ENSRNOG00000000801	304	161	186	223	233	214	132	193	252	209	201	307	478	185	276	204
ENSRNOG00000000802	113	75	72	84	116	75	85	88	82	76	65	115	55	70	69	108
ENSRNOG00000000803	1229	762	789	1063	1142	820	404	723	921	897	831	1100	1123	721	845	745
ENSRNOG00000000804	763	209	239	294	353	339	176	222	249	227	216	437	235	201	564	237
ENSRNOG00000000805	18154	7269	4705	7268	7131	8698	5504	11835	6780	4278	9117	9373	4553	4891	9438	5362
ENSRNOG00000000808	721	147	169	181	226	311	190	358	164	119	306	274	116	190	519	124
ENSRNOG00000000809	895	520	315	507	488	413	247	384	517	442	444	766	582	449	754	462
ENSRNOG00000000811	51	8	25	32	12	44	29	70	15	25	29	30	35	28	112	24
ENSRNOG00000000812	982	277	310	437	334	432	188	270	346	409	288	404	625	270	727	311
ENSRNOG00000000814	2480	1387	554	509	1083	1182	603	1769	491	859	1336	913	190	790	2789	728
ENSRNOG00000000815	645	279	183	177	229	352	220	343	147	225	311	235	54	206	461	170
ENSRNOG00000000816	448	282	169	349	228	236	194	281	288	266	294	364	266	192	380	237
ENSRNOG00000000818	80	39	45	45	30	35	17	30	34	47	28	42	70	16	72	20
ENSRNOG00000000821	17244	7575	7134	10726	11312	8665	5022	7490	11172	7856	7712	14049	11299	6973	14363	8373
ENSRNOG00000000823	2351	744	932	719	1203	1603	990	1046	751	820	1544	722	508	963	1763	607
ENSRNOG00000000824	223	152	91	143	169	189	87	167	98	86	155	150	60	100	233	86
ENSRNOG00000000825	12	5	0	17	8	3	2	9	2	4	1	16	0	3	10	3
ENSRNOG00000000826	3913	1687	1727	2402	2308	2382	972	1602	2471	2454	2452	3238	3161	1493	3398	1987
ENSRNOG00000000827	117	31	26	57	43	61	24	30	46	48	60	93	48	31	143	52
ENSRNOG00000000830	3138	2681	1491	2254	2742	1721	959	3003	2422	1752	1906	3231	3605	1731	1640	1567
ENSRNOG00000000831	414	144	195	254	156	171	97	96	204	147	202	290	304	109	299	181
ENSRNOG00000000833	1018	489	564	644	479	528	305	398	560	634	563	593	779	368	561	419
ENSRNOG00000000836	46	19	15	14	23	25	25	33	34	25	36	32	52	25	28	26
ENSRNOG00000000837	8	0	0	1	1	5	1	2	1	4	3	7	0	0	7	0
ENSRNOG00000000838	0	0	0	1	0	0	0	3	1	0	0	0	2	2	0	0
ENSRNOG00000000839	587	295	267	451	291	449	208	352	393	410	447	447	563	263	449	261
ENSRNOG00000000840	12902	4268	5004	7114	5357	6319	2887	3772	5828	5105	5414	7340	5830	4329	11482	4592
ENSRNOG00000000841	3644	1484	1101	1510	1580	1606	654	1515	1327	1457	1427	2182	1675	1129	2394	1192
ENSRNOG00000000842	1884	1424	692	1271	943	1332	882	1224	1085	1010	1185	1692	1455	756	1691	864
ENSRNOG00000000843	2	0	0	0	0	1	0	8	0	0	3	1	0	4	4	0
ENSRNOG00000000844	18	2	1	13	0	11	10	0	10	0	11	5	2	1	21	3
ENSRNOG00000000845	2237	931	1026	1451	1173	1191	512	806	1254	1102	1003	1604	1650	708	1753	866
ENSRNOG00000000846	0	0	0	0	0	0	0	0	0	0	0	0	0	0	0	0
ENSRNOG00000000847	2226	686	701	1100	832	1035	506	690	946	767	822	1359	1538	639	2019	772
ENSRNOG00000000848	538	243	272	273	252	398	168	284	287	295	308	409	468	196	419	264
ENSRNOG00000000850	50	20	7	22	12	13	4	30	12	21	19	14	9	1	15	13
ENSRNOG00000000851	6699	3934	3604	5459	4810	4020	2475	3335	5354	4150	3656	6262	6608	3235	5014	3760
ENSRNOG00000000852	19401	15528	15276	18005	16594	16847	10717	14677	19011	17142	17764	19979	21429	13416	12427	13913
ENSRNOG00000000853	684	399	241	258	158	481	257	412	276	264	421	303	89	286	680	269
ENSRNOG00000000854	10	9	9	3	0	8	3	9	0	5	12	4	8	3	9	3
ENSRNOG00000000855	10	10	0	2	0	15	5	8	5	2	4	2	7	3	6	4
ENSRNOG00000000857	31	26	1	6	11	15	6	4	15	2	9	5	11	1	21	3
ENSRNOG00000000858	28	12	0	5	4	5	5	19	8	16	5	27	15	4	18	0
ENSRNOG00000000860	33	55	25	30	14	23	26	42	12	63	31	24	6	18	30	20
ENSRNOG00000000861	148	65	24	35	45	85	49	203	24	26	95	75	34	39	142	52
ENSRNOG00000000866	889	385	442	473	514	475	320	475	489	390	433	563	506	453	728	403
ENSRNOG00000000867	1847	1322	1249	1560	1397	1307	783	1049	1559	1446	1197	1761	1823	1042	1294	1186
ENSRNOG00000000868	1	0	0	0	0	0	0	0	0	0	0	0	0	0	0	0
ENSRNOG00000000869	145	83	43	64	66	57	38	80	67	48	50	37	9	57	117	55
ENSRNOG00000000871	0	0	0	0	0	0	0	0	0	0	0	0	0	0	1	0
ENSRNOG00000000872	0	0	0	0	0	0	0	0	0	0	0	3	0	0	0	0
ENSRNOG00000000873	5	0	0	0	0	0	0	17	0	0	0	0	0	0	0	0
ENSRNOG00000000875	2583	979	715	875	969	999	512	1497	817	955	1068	1345	836	1012	1900	796
ENSRNOG00000000878	41	32	0	0	18	3	4	38	8	3	6	33	3	27	6	3
ENSRNOG00000000879	1882	1201	1473	1767	1893	1045	950	1123	1615	1029	1008	1780	1181	1082	1075	1376
ENSRNOG00000000881	143	152	173	188	245	121	166	95	174	117	104	164	277	116	110	155
ENSRNOG00000000885	515	487	341	552	455	443	236	449	567	434	312	674	699	420	260	387
ENSRNOG00000000886	767	623	778	957	1042	458	410	360	1304	534	450	1194	1172	886	277	767
ENSRNOG00000000887	39	33	50	65	68	39	34	30	34	33	39	28	21	37	44	35
ENSRNOG00000000888	2568	1398	1010	1366	1158	1561	932	1430	1088	1164	1423	1520	1046	986	2073	878
ENSRNOG00000000889	3	0	0	0	0	0	0	0	0	0	0	0	0	0	1	0
ENSRNOG00000000891	192	63	23	18	52	115	80	117	16	48	160	25	12	64	120	32
ENSRNOG00000000893	874	385	324	425	415	412	193	385	458	348	329	544	405	300	650	258
ENSRNOG00000000894	4529	2881	3766	4428	6402	2771	1929	2397	5932	2832	2541	5072	4742	3386	2870	4599
ENSRNOG00000000895	817	337	380	558	478	485	325	371	508	377	472	559	435	336	589	388
ENSRNOG00000000896	0	0	0	0	0	0	0	0	0	0	0	0	0	0	0	0
ENSRNOG00000000897	33	3	4	1	4	6	14	14	14	18	8	7	7	7	42	9
ENSRNOG00000000899	240	183	118	129	217	102	104	136	157	141	131	241	168	124	153	178
ENSRNOG00000000900	1011	480	364	466	570	557	250	533	537	414	550	628	482	389	795	364
ENSRNOG00000000901	1098	522	377	585	441	697	284	511	512	543	593	638	442	448	810	335
ENSRNOG00000000902	9354	4137	4978	6225	7045	4986	3571	3512	6321	4646	4253	6645	4587	4280	6357	4981
ENSRNOG00000000903	420	234	146	233	270	241	165	257	220	228	222	352	320	168	333	188
ENSRNOG00000000904	14	9	10	20	8	10	3	8	7	10	2	11	3	17	11	11
ENSRNOG00000000905	23	2	7	11	3	12	13	9	8	8	9	9	13	1	21	0
ENSRNOG00000000906	147	50	118	35	76	139	51	21	62	86	109	72	59	78	160	47
ENSRNOG00000000907	120	81	40	63	19	67	27	61	57	18	35	71	41	38	82	49
ENSRNOG00000000909	1032	686	676	793	853	891	510	624	704	727	843	928	602	579	946	618
ENSRNOG00000000913	257	161	68	136	115	148	73	152	150	97	132	152	89	80	147	81
ENSRNOG00000000916	175	103	95	79	207	76	46	51	133	51	31	83	73	155	18	81
ENSRNOG00000000917	251	92	92	147	113	124	79	79	113	94	95	134	206	103	202	114
ENSRNOG00000000918	1342	640	496	858	717	690	397	636	773	631	697	1003	1200	491	1101	690
ENSRNOG00000000920	170	119	55	124	66	93	43	176	138	68	87	138	74	95	118	75
ENSRNOG00000000921	7577	3103	3252	4896	3582	4777	2516	3578	3912	3016	3935	4892	4662	2514	5811	2813
ENSRNOG00000000922	357	211	104	243	145	182	136	248	178	253	197	248	232	141	284	163
ENSRNOG00000000923	3802	1661	1692	1995	2460	2239	1374	1929	1969	1590	2177	2543	1387	1808	3116	1782
ENSRNOG00000000924	1010	944	975	1180	1156	717	521	698	996	805	783	1043	1067	673	870	847
ENSRNOG00000000925	444	243	154	266	232	311	118	208	192	191	175	359	199	175	384	144
ENSRNOG00000000926	719	193	196	268	206	369	168	237	273	179	268	350	325	186	560	208
ENSRNOG00000000931	1276	625	481	743	523	793	247	537	634	797	783	804	841	449	705	494
ENSRNOG00000000934	3	0	0	2	7	0	0	3	0	0	0	0	0	0	4	0
ENSRNOG00000000936	243	97	70	90	46	92	57	104	72	101	125	130	87	64	127	82
ENSRNOG00000000937	134	88	76	133	54	93	49	74	78	80	75	116	38	69	105	70
ENSRNOG00000000938	4696	1986	1861	2590	2921	2553	1595	2182	2346	1957	2137	3468	3649	2061	3830	1873
ENSRNOG00000000940	635	615	652	763	665	403	255	465	924	671	424	719	525	411	483	525
ENSRNOG00000000942	389	310	244	227	333	189	142	288	206	176	223	362	186	213	308	213
ENSRNOG00000000943	0	0	0	0	0	0	0	0	0	1	0	0	0	0	0	0
ENSRNOG00000000947	0	0	0	0	0	0	0	0	0	0	0	0	0	0	0	0
ENSRNOG00000000949	273	126	140	212	158	182	115	107	139	102	163	248	139	94	201	134
ENSRNOG00000000952	10	13	0	11	7	0	0	5	1	0	3	9	0	2	12	1
ENSRNOG00000000954	1356	648	505	606	709	855	392	534	702	476	707	920	1005	601	1224	536
ENSRNOG00000000955	311	209	149	186	207	249	93	175	214	176	258	243	355	203	249	171
ENSRNOG00000000956	90	63	64	110	86	117	52	43	95	73	81	141	121	28	132	145
ENSRNOG00000000957	5031	891	1986	1277	1842	3051	1966	2013	1902	2171	2423	2754	1104	1898	7138	606
ENSRNOG00000000958	33	22	35	42	19	32	28	22	16	40	31	22	15	39	14	22
ENSRNOG00000000961	379	301	323	343	365	262	172	288	348	296	275	377	301	236	303	294
ENSRNOG00000000962	639	420	304	442	480	340	194	362	414	261	362	572	452	323	491	370
ENSRNOG00000000963	104	96	82	134	80	72	62	125	103	72	83	112	134	86	64	77
ENSRNOG00000000964	97	44	24	5	51	61	11	65	5	30	8	11	11	40	118	19
ENSRNOG00000000967	1455	692	800	1185	1070	831	532	525	1013	875	795	1193	1306	580	1434	861
ENSRNOG00000000968	2367	1424	1809	2138	1928	2097	1189	1182	2057	1649	1934	2163	2111	1397	1954	1615
ENSRNOG00000000969	0	0	0	0	0	0	0	0	0	0	0	0	0	0	0	0
ENSRNOG00000000973	0	0	0	0	0	0	0	0	0	0	0	0	0	0	0	0
ENSRNOG00000000974	833	564	433	636	598	575	347	602	613	555	495	742	824	373	751	519
ENSRNOG00000000975	1562	773	804	1205	1074	907	425	645	1013	887	781	1198	1377	626	1137	768
ENSRNOG00000000977	1508	970	899	1079	1099	809	410	868	1177	1063	848	1481	1298	788	887	909
ENSRNOG00000000978	0	0	0	0	0	0	0	0	0	0	0	0	0	0	0	0
ENSRNOG00000000979	177	107	112	194	244	138	84	141	166	133	135	207	177	128	133	193
ENSRNOG00000000981	983	573	392	408	482	413	188	441	464	520	546	833	545	404	732	389
ENSRNOG00000000982	644	363	430	573	456	571	313	496	548	597	543	529	412	394	642	349
ENSRNOG00000000983	398	147	191	316	236	260	108	223	239	218	249	265	226	167	304	186
ENSRNOG00000000985	557	378	309	443	400	439	211	351	355	353	446	525	502	285	463	360
ENSRNOG00000000986	891	503	466	680	573	500	356	466	680	560	537	693	842	476	723	492
ENSRNOG00000000987	576	412	276	379	310	315	171	280	351	266	289	458	334	237	469	269
ENSRNOG00000000988	984	557	427	628	614	571	297	486	686	579	527	799	875	457	793	588
ENSRNOG00000000989	1053	313	351	377	385	637	219	381	302	489	532	446	181	332	1019	235
ENSRNOG00000000990	3920	2413	2311	3363	2643	3429	1748	2313	3070	3349	3279	3405	3426	2368	3441	2317
ENSRNOG00000000991	649	427	208	585	387	522	277	394	451	410	513	603	572	267	726	360
ENSRNOG00000000993	0	13	0	0	0	1	0	0	0	0	0	0	0	0	4	0
ENSRNOG00000000994	123	85	28	68	58	40	35	83	39	56	74	81	55	39	137	100
ENSRNOG00000000996	5109	2097	1976	2815	2505	2521	1351	1840	2566	2087	2339	3678	3145	1881	3431	2064
ENSRNOG00000000999	894	575	578	771	933	590	415	471	669	599	597	892	762	486	463	656
ENSRNOG00000001001	0	0	0	0	0	0	0	0	0	1	0	0	0	0	0	0
ENSRNOG00000001003	1182	520	565	821	683	775	362	668	677	662	728	924	1028	518	1007	576
ENSRNOG00000001004	5586	4241	4397	5239	5637	4782	2582	4146	5025	5029	4703	5561	6325	3766	3892	3981
ENSRNOG00000001005	3	0	1	2	0	2	1	0	3	3	1	0	0	1	4	1
ENSRNOG00000001006	1757	1019	1306	1927	1649	1404	694	774	1503	1148	1260	1672	2199	996	1538	1404
ENSRNOG00000001007	54	36	24	40	34	34	24	30	37	31	38	51	43	24	49	22
ENSRNOG00000001009	1659	743	515	919	696	912	328	656	729	555	807	1256	1453	627	1303	581
ENSRNOG00000001010	4689	3366	3580	4665	4067	3694	2352	2687	4341	4009	3846	4988	4684	2644	3823	3484
ENSRNOG00000001011	42	27	30	20	33	36	10	29	31	20	26	61	30	23	70	21
ENSRNOG00000001017	0	0	0	0	0	0	0	0	0	0	0	0	0	0	0	0
ENSRNOG00000001019	928	647	599	682	744	614	343	692	800	675	615	982	742	476	640	600
ENSRNOG00000001023	1	0	0	0	0	0	0	0	0	0	0	0	0	0	0	0
ENSRNOG00000001027	0	0	0	0	0	0	0	0	0	0	0	0	0	0	0	0
ENSRNOG00000001030	13427	6967	7415	8010	8477	9395	5609	6178	7857	7640	9016	9335	8720	6704	12595	6386
ENSRNOG00000001031	34	16	8	34	19	25	8	15	24	7	9	16	41	24	37	13
ENSRNOG00000001032	999	408	365	363	417	629	258	430	292	477	646	446	434	350	751	299
ENSRNOG00000001033	501	230	185	254	262	293	151	223	202	186	252	304	150	239	430	167
ENSRNOG00000001034	2639	1497	1489	1834	1524	1661	880	1555	1897	1771	1774	2055	1974	1378	1846	1382
ENSRNOG00000001035	454	146	159	215	238	213	87	129	186	207	185	232	186	154	299	166
ENSRNOG00000001036	170	73	39	21	84	45	22	164	46	73	45	115	47	65	59	66
ENSRNOG00000001037	335	197	163	178	220	190	126	218	132	139	164	163	183	180	232	143
ENSRNOG00000001039	664	269	195	299	228	310	142	250	314	241	307	391	257	188	410	156
ENSRNOG00000001040	549	312	227	302	341	319	165	360	280	374	323	384	204	256	435	236
ENSRNOG00000001043	330	159	147	210	190	234	84	124	216	213	212	241	341	148	286	128
ENSRNOG00000001044	788	300	317	578	367	411	198	305	468	337	350	551	532	319	612	353
ENSRNOG00000001047	955	621	612	908	746	676	403	719	825	589	578	961	846	466	555	662
ENSRNOG00000001048	38	47	21	9	9	5	4	8	10	33	32	20	14	7	13	12
ENSRNOG00000001049	15874	9065	4742	6930	6692	13908	7850	11873	6091	5023	11600	8063	6479	8000	15439	4597
ENSRNOG00000001050	1694	1013	986	1236	1168	1168	614	806	1009	959	987	1314	951	803	1311	925
ENSRNOG00000001052	374	166	189	193	207	242	195	271	174	176	256	291	175	215	279	162
ENSRNOG00000001053	3738	1752	1462	1950	1910	2303	1272	2129	1769	1338	2125	2363	1976	1552	3045	1606
ENSRNOG00000001055	2116	1173	1254	1613	1513	1536	782	971	1498	1582	1640	1882	1775	895	2397	1403
ENSRNOG00000001056	2534	1223	866	1420	1178	1386	682	1150	1203	960	1113	1758	1405	811	2242	1013
ENSRNOG00000001057	22065	7558	8103	12706	9320	10794	4814	5505	11471	9334	8804	15526	15315	7224	22569	8576
ENSRNOG00000001058	1178	626	565	674	583	836	384	540	580	667	884	775	684	484	873	549
ENSRNOG00000001059	509	325	399	544	524	400	232	359	398	449	398	415	434	331	421	416
ENSRNOG00000001060	827	440	482	693	477	574	310	486	641	484	501	680	575	360	609	387
ENSRNOG00000001061	1037	489	416	808	463	682	247	463	630	587	574	680	718	354	854	331
ENSRNOG00000001062	764	588	488	712	586	662	332	513	594	539	720	589	588	434	676	595
ENSRNOG00000001064	3076	1750	2444	2148	2716	2141	1801	1605	2074	1962	2000	2035	1016	1783	1945	2109
ENSRNOG00000001065	909	519	685	986	752	622	339	408	635	614	579	756	732	370	724	499
ENSRNOG00000001066	8	12	0	7	2	2	4	0	2	1	3	4	0	6	2	0
ENSRNOG00000001068	5513	3111	2544	3695	3681	2759	1667	2942	3456	2425	2416	4727	3479	2315	4275	2765
ENSRNOG00000001069	729	281	272	299	451	434	241	399	375	269	479	483	283	227	457	402
ENSRNOG00000001070	3066	1435	1486	1896	1428	2172	990	1359	1442	1438	1759	2442	1587	927	3597	1241
ENSRNOG00000001071	9	1	0	1	1	2	1	1	0	0	2	1	1	0	0	0
ENSRNOG00000001072	1207	1003	1030	1212	1436	801	721	1034	1083	797	855	1191	624	762	667	969
ENSRNOG00000001073	244	170	120	169	108	131	77	158	159	160	123	86	85	100	140	97
ENSRNOG00000001074	207	147	195	114	160	95	77	121	161	186	155	174	55	89	119	124
ENSRNOG00000001079	1072	553	613	962	744	651	380	427	649	599	651	909	677	376	1051	602
ENSRNOG00000001080	1721	763	980	1178	1213	1377	689	946	1304	1495	1377	1473	1459	929	1390	994
ENSRNOG00000001081	446	248	246	304	229	306	105	187	332	299	268	300	324	195	350	187
ENSRNOG00000001082	1575	746	820	1353	893	1102	421	654	1075	987	913	1263	1585	651	1012	715
ENSRNOG00000001083	971	485	416	511	445	553	184	481	430	365	540	594	673	276	732	316
ENSRNOG00000001086	1410	686	681	1085	847	930	508	611	972	909	900	1146	1366	565	1263	749
ENSRNOG00000001088	191	66	79	95	106	100	65	118	123	107	114	157	103	72	159	55
ENSRNOG00000001089	352	225	139	165	152	191	83	149	166	179	132	255	187	153	249	119
ENSRNOG00000001090	383	132	140	183	236	155	84	192	230	178	146	332	277	177	192	135
ENSRNOG00000001091	3223	2208	1696	2764	2307	2007	1174	2090	2382	2250	2013	2590	3064	1482	2338	1743
ENSRNOG00000001092	10	17	6	11	4	5	4	218	9	0	5	778	52	13	4	9
ENSRNOG00000001094	709	598	580	779	685	614	405	410	766	667	662	876	933	452	541	578
ENSRNOG00000001095	0	0	0	0	0	0	0	0	0	0	2	0	0	0	0	0
ENSRNOG00000001098	4471	2465	2921	2849	3531	3240	2383	3176	3018	2549	3227	3325	1993	2951	3228	2814
ENSRNOG00000001099	233	71	99	148	133	116	76	122	119	139	125	121	113	105	184	109
ENSRNOG00000001101	1561	833	711	944	1034	847	550	867	930	733	837	1141	1045	730	1310	751
ENSRNOG00000001103	290	223	221	231	293	208	98	214	273	128	169	375	323	193	223	213
ENSRNOG00000001104	381	314	410	481	479	309	173	225	442	234	248	628	522	283	235	299
ENSRNOG00000001106	1379	674	622	565	611	1081	450	671	474	849	1170	524	680	657	1220	436
ENSRNOG00000001107	168	94	78	123	122	108	54	124	108	111	85	155	207	91	88	97
ENSRNOG00000001108	503	297	217	103	245	346	203	302	199	213	338	137	37	245	434	202
ENSRNOG00000001110	680	279	237	392	295	298	141	333	257	357	304	350	258	277	464	215
ENSRNOG00000001111	202	62	125	113	91	116	91	138	99	106	150	88	119	113	169	74
ENSRNOG00000001113	8239	4437	2988	3777	3525	5261	2882	5646	3340	3422	5379	5644	3053	3459	6520	2790
ENSRNOG00000001114	1154	848	1015	1428	1428	967	631	951	1399	1071	1047	1533	1375	847	845	1160
ENSRNOG00000001115	327	138	94	165	161	172	107	307	169	170	178	356	243	127	285	143
ENSRNOG00000001117	243	225	221	334	278	216	145	149	304	179	189	312	369	167	193	197
ENSRNOG00000001120	1889	1375	2076	2440	2230	1311	993	1235	2345	1765	1472	2513	2075	1280	978	1838
ENSRNOG00000001123	565	387	417	561	490	441	253	403	524	494	473	571	460	382	469	429
ENSRNOG00000001124	3555	1755	2146	2444	2676	2551	1331	1787	2872	2538	2386	3051	2789	2190	2646	2090
ENSRNOG00000001126	704	310	303	435	426	432	207	406	442	477	405	560	486	329	469	321
ENSRNOG00000001128	1420	575	540	761	523	908	390	364	964	712	734	873	1451	655	884	553
ENSRNOG00000001129	2723	1504	1616	1899	2085	1631	955	1574	2172	1536	1588	2266	1825	1541	1821	1540
ENSRNOG00000001130	707	663	435	512	837	429	266	775	751	532	473	1065	1073	691	425	748
ENSRNOG00000001134	418	177	206	252	248	250	126	196	285	281	270	326	248	199	368	189
ENSRNOG00000001135	7286	4598	4213	5379	4616	5131	2765	4518	5482	4731	5190	6314	4425	3528	6054	3871
ENSRNOG00000001136	13450	5173	4622	7989	5366	7082	3180	5086	6702	5193	5135	10050	10319	4416	12029	4573
ENSRNOG00000001138	1210	804	708	943	958	792	409	686	697	763	761	1044	1129	615	837	719
ENSRNOG00000001139	3286	1941	1754	2153	1692	2292	1037	1718	2070	2169	2190	2620	2010	1388	2757	1556
ENSRNOG00000001141	292	199	297	365	398	280	156	133	306	276	166	408	306	172	173	252
ENSRNOG00000001142	552	184	183	224	183	221	102	251	228	238	231	372	304	170	454	161
ENSRNOG00000001143	3812	3609	3478	4673	4065	2935	1481	2666	4349	2250	3204	4661	3820	2215	2261	3320
ENSRNOG00000001145	2217	916	992	1342	1069	1593	631	1181	1391	1475	1675	1357	1398	947	1370	881
ENSRNOG00000001148	11965	8662	5229	8168	6699	8687	4539	7657	7894	6430	7489	11202	8804	5768	11857	6186
ENSRNOG00000001149	883	621	390	622	424	488	271	407	558	575	415	716	755	295	748	378
ENSRNOG00000001151	114	34	49	43	36	69	22	52	48	55	79	67	67	31	84	28
ENSRNOG00000001152	12	0	0	0	3	4	5	29	6	1	1	6	0	4	0	1
ENSRNOG00000001153	3	1	4	0	0	3	0	1	0	0	0	1	0	0	1	1
ENSRNOG00000001156	702	492	305	445	361	409	287	419	354	315	365	678	388	260	499	339
ENSRNOG00000001157	41	36	20	31	4	15	15	15	34	16	21	51	18	8	53	9
ENSRNOG00000001158	2457	1190	1041	1519	1504	1371	701	1062	1591	1187	1127	2062	1885	1095	1509	1077
ENSRNOG00000001159	5	5	1	2	0	0	0	0	0	0	0	5	0	0	2	0
ENSRNOG00000001160	0	0	0	0	0	0	4	2	0	1	0	0	0	0	1	4
ENSRNOG00000001161	996	459	436	478	450	652	343	556	457	453	588	516	145	387	848	395
ENSRNOG00000001162	0	0	0	0	0	0	0	0	0	0	0	0	0	0	0	0
ENSRNOG00000001163	449	344	157	245	133	217	110	235	188	291	223	307	315	141	287	143
ENSRNOG00000001164	0	0	0	0	0	0	0	0	0	0	0	0	0	0	0	0
ENSRNOG00000001165	1	0	0	0	0	0	0	3	0	0	0	0	0	0	0	0
ENSRNOG00000001167	3	0	6	0	2	11	5	0	13	5	5	5	0	0	4	1
ENSRNOG00000001168	128	40	39	47	59	30	28	128	42	62	57	97	30	41	84	34
ENSRNOG00000001169	220	60	83	110	120	104	47	100	119	143	120	173	202	80	177	93
ENSRNOG00000001170	12808	6537	4996	9715	5767	7685	4366	4953	8153	5661	5681	11713	11413	5395	12646	6289
ENSRNOG00000001171	803	324	314	433	339	413	159	360	378	361	380	458	369	221	565	258
ENSRNOG00000001172	9233	5743	4730	6066	5673	6426	3430	5656	6262	5944	6052	7525	5807	4645	7919	4953
ENSRNOG00000001173	6997	2982	3896	6096	2395	5988	1943	2185	3929	4940	4326	4548	5927	1997	6859	2444
ENSRNOG00000001174	718	318	227	308	255	351	200	239	233	333	382	354	258	207	457	234
ENSRNOG00000001175	1573	938	705	1158	986	1065	591	1026	1053	955	973	1485	1226	611	1321	811
ENSRNOG00000001177	642	274	188	323	234	378	176	344	290	243	319	393	391	180	484	209
ENSRNOG00000001178	1101	548	572	632	733	583	250	463	629	585	556	923	841	448	644	575
ENSRNOG00000001181	231	72	99	126	96	116	56	124	85	87	125	124	112	91	187	72
ENSRNOG00000001182	1816	836	619	1121	815	940	531	777	1023	876	762	1397	1395	649	1576	730
ENSRNOG00000001183	0	0	0	2	2	0	0	0	1	5	0	2	0	1	1	1
ENSRNOG00000001184	225	137	90	130	123	117	63	77	165	74	127	191	152	95	195	111
ENSRNOG00000001185	7138	2988	3309	4476	4035	4662	1639	3441	4214	4033	4310	5368	5853	2998	6135	3283
ENSRNOG00000001187	13	13	0	1	6	3	2	5	13	9	12	11	2	3	2	7
ENSRNOG00000001189	148	66	29	128	65	43	53	100	57	61	71	175	260	39	118	91
ENSRNOG00000001190	1372	613	451	680	545	547	340	605	603	603	632	797	637	384	824	512
ENSRNOG00000001191	916	485	511	534	639	651	353	620	669	663	723	800	650	489	612	513
ENSRNOG00000001192	1967	1128	714	1211	1084	1162	532	1491	1031	800	1007	1648	1140	790	1683	763
ENSRNOG00000001193	6	0	3	3	4	6	16	9	2	7	1	6	10	7	10	0
ENSRNOG00000001194	230	184	108	223	195	136	93	148	209	191	167	236	183	148	150	156
ENSRNOG00000001195	11	16	4	30	9	12	0	6	13	6	16	48	5	3	9	21
ENSRNOG00000001198	366	294	134	211	200	196	89	209	245	118	192	268	460	176	166	120
ENSRNOG00000001199	757	390	333	484	493	551	177	329	527	419	448	637	629	259	563	321
ENSRNOG00000001201	1097	389	314	450	428	512	267	415	473	315	385	645	510	321	879	346
ENSRNOG00000001203	1573	770	632	977	935	998	444	694	1012	869	895	1261	1084	555	1160	692
ENSRNOG00000001204	2371	1534	978	1557	1353	1576	989	1670	1352	1418	1613	2009	1452	1154	1747	1109
ENSRNOG00000001205	10148	6940	7565	9821	7994	8568	4921	7928	8701	7247	8362	9783	8940	5708	8210	6158
ENSRNOG00000001210	819	523	583	678	683	624	370	534	681	622	625	812	850	581	766	536
ENSRNOG00000001211	2751	1276	910	1623	1021	1405	717	1222	1213	1237	1233	1929	1943	888	2474	987
ENSRNOG00000001212	0	0	0	0	0	0	0	0	0	0	0	0	0	0	0	0
ENSRNOG00000001213	2	0	0	0	0	0	0	0	0	0	0	3	0	0	0	0
ENSRNOG00000001214	3580	1903	1994	2172	3291	2108	1261	2124	2813	2604	2094	3385	3411	1889	2812	2170
ENSRNOG00000001215	1063	545	477	700	505	666	351	567	716	557	582	804	929	517	870	402
ENSRNOG00000001216	813	509	487	692	533	525	277	447	645	551	541	638	696	422	459	388
ENSRNOG00000001217	27	17	28	20	28	14	6	16	18	41	16	13	8	21	23	22
ENSRNOG00000001218	0	0	0	0	0	0	0	0	0	0	0	0	0	0	0	0
ENSRNOG00000001219	15	1	0	0	1	5	3	5	4	4	6	0	10	5	4	3
ENSRNOG00000001220	0	0	0	0	0	0	0	0	0	0	0	0	0	0	0	0
ENSRNOG00000001222	797	321	411	575	539	509	289	320	449	451	479	764	573	331	690	384
ENSRNOG00000001223	3069	1974	1266	2008	1650	1894	1101	2034	1669	1294	1659	2562	1489	1234	2662	1347
ENSRNOG00000001224	456	211	121	288	150	162	122	256	223	150	131	303	184	151	296	201
ENSRNOG00000001225	1095	523	389	678	469	649	300	480	556	589	620	899	797	464	919	457
ENSRNOG00000001226	12	0	5	4	2	8	4	6	21	7	4	17	2	7	9	6
ENSRNOG00000001227	7140	5076	5213	7897	5156	5896	3771	4906	6421	4699	5642	7131	7530	4532	5224	4962
ENSRNOG00000001228	915	437	351	512	518	539	252	547	498	456	533	638	636	352	700	415
ENSRNOG00000001229	668	757	258	518	306	509	177	206	527	290	363	440	874	296	439	262
ENSRNOG00000001232	241	131	81	157	143	114	60	124	161	137	185	197	226	81	179	112
ENSRNOG00000001235	12733	9671	6624	10220	8290	9048	5715	10769	8305	7008	8888	11628	9161	6897	9870	6336
ENSRNOG00000001236	750	410	269	452	401	375	201	288	404	454	382	548	576	299	479	330
ENSRNOG00000001237	2402	1429	1409	1654	1970	1660	823	1384	2093	1847	1588	2229	2347	1247	1647	1473
ENSRNOG00000001238	1658	745	608	701	706	1113	557	945	570	599	957	705	422	706	1416	505
ENSRNOG00000001239	1939	958	683	1373	913	1143	528	783	1049	804	853	1434	1363	619	1756	750
ENSRNOG00000001241	462	327	309	365	342	319	153	335	395	361	425	423	385	264	347	240
ENSRNOG00000001242	1828	1203	536	959	883	992	539	1069	903	689	765	1428	859	680	1399	586
ENSRNOG00000001243	457	157	131	219	169	211	77	201	136	191	254	221	182	105	260	141
ENSRNOG00000001245	1240	488	484	991	749	664	344	508	617	631	510	1367	824	502	1774	877
ENSRNOG00000001247	1647	898	1129	1281	1720	1119	582	919	1309	1005	1095	1565	1136	1033	1228	1227
ENSRNOG00000001249	791	577	295	371	250	319	126	141	300	716	351	301	472	109	445	237
ENSRNOG00000001250	857	658	373	787	515	525	311	721	496	435	509	970	728	320	591	379
ENSRNOG00000001251	10	16	0	1	9	4	2	7	2	7	3	1	3	3	6	13
ENSRNOG00000001252	500	256	168	183	285	284	117	229	248	269	225	372	433	173	353	182
ENSRNOG00000001253	2917	2131	1809	2640	2715	2394	1442	2032	2512	2329	2390	3156	2573	1879	2273	2041
ENSRNOG00000001254	307	455	120	326	153	248	105	125	233	205	206	270	378	101	299	130
ENSRNOG00000001255	435	419	388	351	373	340	172	200	339	357	290	492	476	211	267	305
ENSRNOG00000001256	2640	1219	1119	1462	1380	1574	825	1052	1150	1136	1318	1827	1490	1026	1961	1079
ENSRNOG00000001258	718	459	239	362	479	562	235	666	470	384	499	727	562	368	643	484
ENSRNOG00000001259	2630	2321	2599	3425	1799	2692	1435	1235	3015	2692	3010	2919	3184	1443	1712	1917
ENSRNOG00000001260	74	33	27	24	34	35	28	13	13	10	18	30	27	19	39	13
ENSRNOG00000001261	71	20	36	37	22	45	12	33	30	34	26	34	61	29	83	20
ENSRNOG00000001262	7	8	7	4	0	0	10	1	3	9	7	7	11	1	5	10
ENSRNOG00000001265	403	203	167	293	267	220	138	203	246	202	203	413	375	213	286	149
ENSRNOG00000001267	667	690	401	536	509	349	219	504	578	428	404	656	489	335	403	428
ENSRNOG00000001269	4810	1823	1586	1885	2155	2628	1656	1963	1944	1350	2252	2228	1792	2090	3742	1751
ENSRNOG00000001270	62	63	38	49	28	16	23	46	19	23	42	80	26	25	54	53
ENSRNOG00000001271	80	105	48	67	65	75	50	81	61	45	43	81	36	48	88	91
ENSRNOG00000001272	1746	1238	1310	1736	1758	1244	719	1040	1725	1324	1242	1810	1668	1093	1206	1274
ENSRNOG00000001273	629	240	189	379	245	359	135	289	268	220	325	393	408	227	551	201
ENSRNOG00000001274	2523	637	567	746	771	1241	663	719	649	589	1136	806	301	781	2021	617
ENSRNOG00000001275	0	0	0	0	0	1	0	1	0	0	0	0	0	0	0	0
ENSRNOG00000001276	1016	850	866	1086	1149	914	548	944	1137	990	978	1167	1272	817	734	880
ENSRNOG00000001277	448	273	277	319	366	345	169	283	306	355	274	463	448	260	330	229
ENSRNOG00000001278	674	295	244	374	306	370	165	239	324	294	273	322	267	252	478	241
ENSRNOG00000001283	1426	911	891	1162	1156	1017	636	714	1125	991	976	1315	1266	721	1311	950
ENSRNOG00000001284	0	0	0	0	0	0	0	38	0	5	0	0	0	1	0	0
ENSRNOG00000001285	26568	13927	17542	20569	19600	16221	11686	10903	18861	14280	13874	18129	15169	12077	17070	14892
ENSRNOG00000001287	24	40	22	46	29	18	17	33	28	34	19	72	45	19	38	20
ENSRNOG00000001288	462	380	261	477	286	343	257	459	327	239	325	446	354	257	323	269
ENSRNOG00000001289	477	249	224	300	249	389	172	270	333	316	372	405	436	208	406	216
ENSRNOG00000001291	6775	4483	5420	7368	5177	5917	3158	3551	6119	5761	5768	6791	7363	3682	5478	4236
ENSRNOG00000001293	1849	762	798	1208	964	1003	476	775	972	837	869	1408	1308	673	1400	621
ENSRNOG00000001294	650	256	240	322	430	310	205	390	316	271	298	412	179	244	479	295
ENSRNOG00000001295	55818	28553	15995	25483	17060	36493	16423	32137	19924	20063	30363	30748	16256	18547	51241	14422
ENSRNOG00000001296	254	171	124	167	113	115	62	177	128	112	191	238	98	81	148	157
ENSRNOG00000001297	1255	606	482	524	688	548	326	844	651	650	649	899	747	537	849	559
ENSRNOG00000001298	1	0	0	0	0	0	1	1	0	0	0	0	0	0	0	0
ENSRNOG00000001299	1809	878	1043	1623	1031	938	583	672	1158	979	949	1490	1069	699	1244	920
ENSRNOG00000001300	435	214	206	341	253	235	149	201	284	213	213	290	302	150	304	191
ENSRNOG00000001302	3759	1287	617	793	1127	1867	822	676	2947	1250	1038	1774	4700	1844	220	1040
ENSRNOG00000001303	1280	836	882	1143	1149	816	598	1043	1145	784	880	1195	1103	788	892	1023
ENSRNOG00000001304	2658	2008	1612	2003	2910	1861	1408	1659	3356	1688	1880	2738	2597	2365	1104	2178
ENSRNOG00000001309	2605	2562	3528	4846	2888	2345	1804	1154	3786	3091	2463	3422	4365	1661	2224	2767
ENSRNOG00000001311	943	508	537	748	656	708	310	597	718	783	754	855	664	547	656	600
ENSRNOG00000001312	1517	861	895	1276	1106	1486	575	1232	1031	1132	1647	1304	1207	792	1303	803
ENSRNOG00000001313	1539	981	1120	1423	1483	1112	542	772	1385	1081	1092	1531	1736	917	1247	1020
ENSRNOG00000001314	2185	1157	1177	1726	1526	1457	729	1326	1654	1364	1475	1985	1849	1079	1922	1407
ENSRNOG00000001315	20	2	7	4	7	3	2	8	4	12	7	19	0	3	7	7
ENSRNOG00000001316	5792	3167	2593	3419	3773	3477	2055	3273	3668	3299	3496	4362	3681	2731	4668	2575
ENSRNOG00000001317	1130	284	205	175	383	828	530	857	198	201	871	198	158	490	856	167
ENSRNOG00000001323	560	200	228	177	277	333	204	344	171	191	314	173	145	293	465	158
ENSRNOG00000001324	65	23	21	29	31	35	15	28	28	24	27	33	36	28	31	25
ENSRNOG00000001325	300	138	45	96	80	88	55	98	80	131	85	131	124	70	250	118
ENSRNOG00000001329	465	521	367	511	575	299	202	621	484	271	306	607	428	304	198	382
ENSRNOG00000001331	1525	723	620	735	799	851	453	798	910	572	734	1054	732	721	1172	639
ENSRNOG00000001333	4	1	0	0	1	0	0	4	1	0	4	3	0	0	3	5
ENSRNOG00000001335	552	371	466	495	640	381	324	453	463	255	335	446	291	337	369	485
ENSRNOG00000001336	157	143	64	85	150	99	79	139	112	93	98	162	152	63	164	86
ENSRNOG00000001337	931	813	776	1001	979	626	434	671	939	697	599	1231	1271	637	639	799
ENSRNOG00000001338	64	41	26	47	22	46	26	32	34	29	31	47	19	21	47	28
ENSRNOG00000001339	764	343	258	475	378	404	197	357	380	349	374	475	532	275	655	348
ENSRNOG00000001341	105	56	42	30	65	45	34	55	32	32	88	44	31	58	54	38
ENSRNOG00000001342	187	38	74	41	136	64	31	111	96	105	85	134	48	67	154	89
ENSRNOG00000001343	1467	793	985	1169	1177	987	549	749	1031	911	859	1332	1043	749	1132	844
ENSRNOG00000001344	3818	2603	1488	2518	2054	2120	1540	2384	2515	1758	1865	3262	2744	1649	2677	1887
ENSRNOG00000001345	1254	760	498	709	607	763	367	569	566	533	742	727	520	540	1012	532
ENSRNOG00000001346	4647	3503	3275	4281	3399	4000	2571	3068	4050	3402	4132	4891	3459	2904	4363	3095
ENSRNOG00000001347	195	110	130	123	98	123	37	111	108	78	120	137	101	97	101	88
ENSRNOG00000001348	1450	570	542	748	718	692	444	709	663	717	661	1013	1092	505	1088	501
ENSRNOG00000001349	806	596	349	548	535	518	298	576	475	395	558	687	354	369	631	498
ENSRNOG00000001350	596	409	399	525	598	399	257	309	419	332	356	514	327	290	422	415
ENSRNOG00000001351	1601	686	446	638	594	606	265	610	571	744	671	871	726	453	1080	522
ENSRNOG00000001352	4644	3603	4218	4796	6803	3272	2148	3214	5898	3688	3504	5696	5750	3454	2462	4719
ENSRNOG00000001353	465	274	259	298	328	326	179	262	286	309	317	383	268	265	378	240
ENSRNOG00000001355	1631	731	711	854	867	861	466	717	854	958	939	1123	998	649	1325	743
ENSRNOG00000001357	211	123	113	189	134	101	69	92	147	132	93	169	192	105	185	115
ENSRNOG00000001360	4	3	0	0	4	2	5	1	2	0	2	2	0	0	2	2
ENSRNOG00000001367	97	35	13	44	23	42	20	60	10	30	51	50	51	19	46	28
ENSRNOG00000001368	13329	8419	10082	13186	9848	9838	6646	6402	10658	9326	9595	11672	10584	6646	14869	8364
ENSRNOG00000001369	37	34	4	51	20	13	12	19	31	29	35	28	34	10	56	17
ENSRNOG00000001370	0	5	0	0	4	0	0	0	0	0	0	0	0	0	1	0
ENSRNOG00000001372	31	26	13	50	18	11	19	22	20	29	45	28	24	2	19	15
ENSRNOG00000001374	2103	966	1109	753	1815	993	503	878	1594	1596	1399	1903	1567	1131	1580	1209
ENSRNOG00000001375	297	218	115	178	155	210	105	188	181	99	164	225	91	124	234	158
ENSRNOG00000001376	1889	1099	675	1206	920	994	574	1225	1004	915	973	1501	1457	643	1221	632
ENSRNOG00000001377	1320	870	784	1206	1010	921	551	777	1036	781	838	1239	1342	708	1030	781
ENSRNOG00000001378	238	108	92	83	97	123	52	148	127	102	96	146	81	81	180	80
ENSRNOG00000001379	36	17	24	5	40	29	20	27	13	14	45	6	1	21	44	20
ENSRNOG00000001380	1849	1762	1026	1502	1028	1526	803	1696	1292	1523	1612	1457	1105	890	1429	1033
ENSRNOG00000001383	248	126	80	172	121	132	68	141	152	138	113	159	76	65	134	79
ENSRNOG00000001385	2258	1545	1231	1990	1708	1581	837	1584	1709	1587	1346	2222	2136	983	1678	1132
ENSRNOG00000001387	14	5	15	87	7	9	6	6	11	13	12	11	35	5	10	10
ENSRNOG00000001388	49	39	24	20	51	51	23	31	56	54	34	41	39	18	37	38
ENSRNOG00000001389	33	33	4	12	11	29	11	21	22	5	26	26	20	24	23	17
ENSRNOG00000001391	282	194	94	209	113	200	144	197	187	131	166	243	205	113	224	143
ENSRNOG00000001392	2	26	0	0	4	0	0	74	0	8	1	1	9	2	8	7
ENSRNOG00000001396	710	347	184	331	253	347	196	290	282	241	243	468	446	203	557	208
ENSRNOG00000001397	264	256	207	241	238	182	105	214	258	205	221	331	306	193	182	177
ENSRNOG00000001399	0	0	0	0	0	0	0	0	0	0	0	0	0	0	0	0
ENSRNOG00000001402	446	313	145	216	220	260	104	285	217	210	238	318	254	154	309	175
ENSRNOG00000001404	1617	712	764	1103	966	976	589	611	1003	863	879	1375	1383	678	974	665
ENSRNOG00000001407	47	26	7	37	4	26	7	27	13	14	23	27	6	14	25	4
ENSRNOG00000001408	2133	718	839	1127	1035	995	545	682	1152	1145	962	1460	1368	869	1635	895
ENSRNOG00000001409	9939	3682	3142	4966	4854	5227	2134	3901	5755	4432	4195	6921	8318	3691	7651	4109
ENSRNOG00000001410	1312	1153	798	987	860	779	470	1052	1057	1380	1129	1155	1309	709	618	858
ENSRNOG00000001412	6	0	0	2	0	2	1	0	0	0	1	0	0	0	0	0
ENSRNOG00000001414	27	29	12	1	10	13	4	21	5	4	15	28	24	16	32	5
ENSRNOG00000001415	5368	2378	2215	3237	2483	3328	1563	2014	3453	2450	2955	3887	3752	2567	4002	2341
ENSRNOG00000001416	2178	598	742	992	1063	1102	422	961	969	1062	801	1319	1305	727	1367	773
ENSRNOG00000001417	778	421	250	495	438	401	179	462	477	261	375	612	552	214	474	276
ENSRNOG00000001418	1223	487	368	661	430	729	300	468	619	611	537	858	723	481	939	484
ENSRNOG00000001419	26	9	14	20	17	20	1	13	15	11	16	13	34	0	13	30
ENSRNOG00000001420	4564	2071	1734	3060	2039	2934	1407	2216	2546	1988	2340	3775	3111	1706	4328	1930
ENSRNOG00000001422	21	7	17	25	3	2	1	2	5	0	6	15	0	0	18	10
ENSRNOG00000001424	2059	1470	1214	1949	945	1409	1022	1095	1797	1040	1269	1698	1572	948	1584	1113
ENSRNOG00000001425	107	77	63	91	57	64	33	106	68	76	43	66	65	47	95	30
ENSRNOG00000001426	431	314	239	401	323	333	193	346	358	350	312	435	303	272	341	279
ENSRNOG00000001427	942	543	687	772	808	772	505	552	1058	809	766	862	974	730	587	775
ENSRNOG00000001428	187	91	86	105	130	121	40	66	117	119	99	160	178	78	126	62
ENSRNOG00000001429	372	117	128	195	176	177	61	122	164	164	152	224	179	104	233	107
ENSRNOG00000001430	604	197	170	279	161	238	128	175	205	219	192	300	333	173	482	167
ENSRNOG00000001431	126	69	49	72	39	75	32	112	75	72	63	88	108	28	136	59
ENSRNOG00000001432	254	146	78	156	105	120	55	110	120	74	122	192	148	103	192	112
ENSRNOG00000001434	0	0	0	0	0	0	1	0	0	0	0	0	0	0	0	1
ENSRNOG00000001435	58	61	23	30	43	51	18	55	61	34	25	33	30	37	70	52
ENSRNOG00000001436	19411	9021	10025	13234	14653	11911	6288	9879	12690	10425	11260	15974	15554	8670	16967	10072
ENSRNOG00000001439	1102	802	795	1131	805	1069	451	626	946	1049	944	1154	1365	717	750	699
ENSRNOG00000001440	6713	2659	2519	4124	3444	3556	1828	2432	3486	2706	2813	4635	4195	2398	5975	2767
ENSRNOG00000001441	558	286	212	425	246	324	149	290	270	341	327	341	326	201	376	241
ENSRNOG00000001442	3516	1925	1523	2435	1920	2119	1161	1800	2175	1749	1909	2840	2782	1366	2153	1641
ENSRNOG00000001443	1033	836	600	870	1089	617	356	783	911	765	612	1183	1195	638	766	732
ENSRNOG00000001444	0	0	0	0	0	0	0	0	0	0	0	0	0	0	0	0
ENSRNOG00000001448	1766	1571	1005	1506	1482	1150	820	1484	1413	1214	1279	1925	1307	917	1365	1027
ENSRNOG00000001449	2594	1540	2029	2353	2293	1636	753	1193	2008	1702	1450	2412	2983	1306	1562	1552
ENSRNOG00000001450	440	153	173	301	236	262	103	220	228	204	235	300	393	149	364	198
ENSRNOG00000001451	17	23	11	19	7	4	3	4	0	2	9	9	5	5	22	5
ENSRNOG00000001452	516	409	321	646	330	393	234	363	418	395	457	597	586	260	388	310
ENSRNOG00000001453	4045	2631	2543	2490	3186	2538	1471	2231	2667	2943	2569	3139	2392	1994	2404	2233
ENSRNOG00000001454	13392	7260	7006	10047	8270	8878	4854	7453	9008	8106	8562	11353	11426	6237	11835	7210
ENSRNOG00000001455	1280	925	754	942	1000	641	535	1126	941	714	757	1222	921	692	803	729
ENSRNOG00000001456	1317	668	546	504	843	710	444	704	542	493	663	555	299	621	881	582
ENSRNOG00000001457	436	277	191	336	236	267	155	195	304	293	256	371	315	164	356	253
ENSRNOG00000001460	3	0	3	0	2	3	2	1	0	0	4	0	0	0	1	0
ENSRNOG00000001465	5316	3262	3031	2802	4159	2688	1911	3797	3367	2183	2866	3896	904	3122	3068	3011
ENSRNOG00000001466	0	0	0	0	0	0	0	0	0	0	0	0	0	0	0	0
ENSRNOG00000001469	250	287	122	234	156	203	88	125	154	237	163	209	291	80	254	133
ENSRNOG00000001470	2721	1826	2050	2774	2731	2075	1254	2022	2204	2157	2031	2615	2655	1453	2125	1843
ENSRNOG00000001474	93	31	20	28	54	67	27	39	62	51	27	60	77	41	108	34
ENSRNOG00000001476	5	1	2	0	2	6	0	3	12	19	2	6	5	3	5	3
ENSRNOG00000001478	133	96	70	82	49	75	37	53	82	76	83	82	180	58	108	55
ENSRNOG00000001479	8189	4887	4615	5789	5845	5005	2981	4222	5274	4668	4620	6694	6193	3872	6202	4460
ENSRNOG00000001480	366	219	105	149	108	137	98	145	165	90	175	208	94	106	222	105
ENSRNOG00000001482	469	303	304	338	297	279	137	240	319	346	328	376	361	219	366	302
ENSRNOG00000001483	572	368	277	363	283	367	203	266	421	356	373	479	456	263	468	214
ENSRNOG00000001484	1499	1468	1567	1914	2069	1461	941	1378	1931	1508	1548	2071	1825	1217	996	1502
ENSRNOG00000001487	2614	1402	1502	1852	2090	1659	969	1708	1792	1466	1576	2075	1498	1456	1625	1611
ENSRNOG00000001488	3750	2007	1674	2309	2273	2677	1520	2330	2171	1942	2284	2679	2566	1790	3244	1890
ENSRNOG00000001489	297	111	117	128	213	157	106	161	144	97	131	202	125	113	245	133
ENSRNOG00000001490	521	200	203	272	292	388	150	268	226	257	263	281	192	237	472	186
ENSRNOG00000001492	9020	4869	8320	9106	10314	5802	3538	2330	9931	7882	6006	10039	12167	5636	6926	8041
ENSRNOG00000001493	1097	530	398	653	526	610	330	561	632	531	558	817	766	422	825	408
ENSRNOG00000001494	6998	2530	3089	4457	3332	3910	1698	1687	3956	3362	2936	4700	4668	2386	6183	2725
ENSRNOG00000001499	6	0	0	0	0	2	0	6	4	0	3	2	5	0	14	8
ENSRNOG00000001500	1620	548	642	1179	808	841	480	555	927	680	709	1322	1575	665	1466	643
ENSRNOG00000001501	479	125	177	192	195	266	91	221	207	176	166	260	224	153	358	203
ENSRNOG00000001506	2131	490	522	503	915	1213	560	862	634	487	944	790	626	873	1870	513
ENSRNOG00000001510	0	0	0	0	0	0	0	0	0	0	0	0	0	0	0	0
ENSRNOG00000001511	0	0	0	0	0	0	0	0	0	0	0	0	0	0	0	0
ENSRNOG00000001512	0	0	0	0	0	0	0	0	0	0	0	0	0	0	0	0
ENSRNOG00000001514	187	73	43	26	90	33	25	114	20	35	46	175	42	61	145	69
ENSRNOG00000001515	429	472	303	423	390	281	296	451	427	312	318	455	181	276	267	355
ENSRNOG00000001516	14381	8808	8604	7729	6657	11570	6923	8576	7101	8341	12251	8218	3091	6307	16883	5047
ENSRNOG00000001517	991	706	613	835	832	706	555	648	743	460	672	973	718	535	856	593
ENSRNOG00000001518	1047	835	592	960	915	519	496	1014	873	392	676	975	519	620	570	793
ENSRNOG00000001519	149	42	41	104	83	58	17	100	49	11	44	226	69	53	152	90
ENSRNOG00000001520	815	391	250	527	436	305	127	585	291	359	364	713	356	264	896	493
ENSRNOG00000001522	197	49	47	60	42	89	36	85	86	54	82	103	84	37	116	32
ENSRNOG00000001524	548	146	116	83	171	265	157	218	116	102	254	137	58	186	431	86
ENSRNOG00000001525	2768	1278	1092	1229	1444	1547	760	1432	1334	1000	1492	2005	1409	1177	1644	1314
ENSRNOG00000001527	18	16	4	3	2	10	1	2	4	2	12	10	0	5	9	7
ENSRNOG00000001528	11413	4989	5159	4423	6575	6995	4092	6716	5693	5928	7543	7110	5029	5789	10312	5415
ENSRNOG00000001531	187	69	37	71	60	125	69	83	52	48	75	104	48	48	123	32
ENSRNOG00000001544	62	73	66	99	56	46	22	48	104	63	32	58	101	35	33	49
ENSRNOG00000001547	220	203	207	213	278	155	130	188	186	114	137	182	270	173	123	226
ENSRNOG00000001548	955	616	332	436	373	649	388	740	410	376	578	427	215	422	764	289
ENSRNOG00000001549	974	431	355	571	468	624	352	686	375	425	629	717	490	444	754	414
ENSRNOG00000001551	3735	1634	1330	1631	1328	2293	1282	1375	1239	1384	1928	1308	470	1440	3228	1240
ENSRNOG00000001554	179	56	93	97	95	86	112	174	55	49	73	98	68	65	97	65
ENSRNOG00000001555	529	159	163	188	185	235	140	215	177	161	215	221	194	164	389	138
ENSRNOG00000001556	1930	731	790	829	880	1134	865	1007	596	512	1155	1047	424	765	1149	556
ENSRNOG00000001557	385	290	200	197	258	137	102	186	215	251	184	280	176	111	146	273
ENSRNOG00000001559	728	195	227	270	304	388	172	267	217	205	281	273	288	259	612	225
ENSRNOG00000001566	0	0	0	0	0	0	0	0	0	0	0	0	0	0	0	0
ENSRNOG00000001567	0	0	0	0	0	0	0	0	0	0	0	0	0	0	0	0
ENSRNOG00000001570	0	0	0	0	0	0	0	0	0	0	0	0	0	0	0	0
ENSRNOG00000001571	0	0	0	0	0	0	0	0	0	0	0	0	0	0	0	0
ENSRNOG00000001572	7	3	2	0	2	1	1	5	4	0	6	1	0	0	8	0
ENSRNOG00000001573	645	358	438	489	452	344	294	304	375	329	372	590	390	294	390	323
ENSRNOG00000001575	381	128	116	119	168	154	114	273	134	101	178	150	117	162	245	134
ENSRNOG00000001577	0	0	0	0	0	0	0	0	0	0	0	0	0	0	0	0
ENSRNOG00000001578	0	0	0	0	0	0	0	0	0	0	0	0	0	0	0	0
ENSRNOG00000001580	0	0	0	0	0	0	0	0	0	0	0	0	0	0	0	0
ENSRNOG00000001581	0	0	0	0	0	0	0	0	0	0	0	0	0	0	0	0
ENSRNOG00000001582	123	98	73	82	135	61	47	98	89	92	68	144	107	60	104	83
ENSRNOG00000001584	55	12	21	62	21	30	19	28	43	18	32	53	44	32	66	25
ENSRNOG00000001585	681	300	397	476	578	494	364	444	470	281	560	482	230	392	548	383
ENSRNOG00000001587	0	0	0	0	0	0	0	0	0	0	0	0	0	0	0	0
ENSRNOG00000001588	0	0	0	0	0	0	0	0	0	0	0	0	0	0	0	0
ENSRNOG00000001589	0	0	0	0	0	0	0	0	0	0	0	0	0	0	0	0
ENSRNOG00000001591	0	1	3	1	0	0	1	0	0	0	4	0	1	0	0	5
ENSRNOG00000001592	4094	1491	1415	1295	2273	2199	1418	2013	1252	1380	2062	1407	1126	1837	2997	1411
ENSRNOG00000001593	630	174	365	427	420	417	308	251	397	268	398	415	415	250	438	262
ENSRNOG00000001595	0	0	0	0	0	0	0	0	0	0	1	0	0	0	0	1
ENSRNOG00000001596	5299	1835	1578	2384	2024	2660	1322	1858	1844	1664	1974	2414	2057	1736	4558	1873
ENSRNOG00000001597	1471	915	1277	1074	1685	956	668	802	1144	828	840	1201	720	1017	980	1129
ENSRNOG00000001598	436	164	108	79	142	254	125	218	83	173	259	102	34	154	311	93
ENSRNOG00000001599	614	204	236	239	291	437	198	269	301	323	359	311	203	270	434	225
ENSRNOG00000001601	0	0	0	0	0	0	0	0	0	0	0	0	0	0	0	0
ENSRNOG00000001602	1097	598	563	618	858	606	416	641	569	548	626	595	318	501	783	561
ENSRNOG00000001603	232	102	78	137	107	126	47	111	96	74	120	133	108	95	183	81
ENSRNOG00000001606	90	55	56	79	67	65	45	78	63	62	52	65	57	35	44	87
ENSRNOG00000001607	138	104	48	98	70	65	42	104	112	35	60	124	88	37	78	37
ENSRNOG00000001608	682	345	385	511	420	409	265	367	383	409	416	395	205	286	515	275
ENSRNOG00000001609	278	183	210	246	245	182	95	215	189	130	153	198	153	134	175	226
ENSRNOG00000001611	5231	3989	2612	3925	3194	4361	2663	3680	3970	3350	4047	4795	2316	2770	5179	3077
ENSRNOG00000001613	1392	807	862	888	1197	1009	629	782	800	662	1093	881	771	722	1061	746
ENSRNOG00000001616	617	312	219	221	343	322	208	393	179	173	315	221	62	200	435	197
ENSRNOG00000001618	27	16	0	0	24	7	15	27	17	0	1	33	9	11	21	4
ENSRNOG00000001620	226	150	173	150	178	160	76	118	218	211	171	184	247	95	120	177
ENSRNOG00000001621	202	223	182	214	243	165	98	153	141	182	164	227	170	126	125	175
ENSRNOG00000001622	7	1	2	6	1	2	2	1	0	5	8	2	0	4	0	1
ENSRNOG00000001623	496	310	241	294	300	199	143	213	286	256	224	466	287	174	255	269
ENSRNOG00000001627	121	95	15	38	44	61	38	78	77	19	49	70	52	61	128	37
ENSRNOG00000001628	7905	2047	1409	2088	1706	3657	1283	1761	2631	1808	1980	2833	1130	2634	4473	1785
ENSRNOG00000001629	1968	1134	1075	1264	1375	1324	812	1306	1134	1303	1369	1556	877	1008	1630	1132
ENSRNOG00000001632	720	548	481	417	762	395	272	545	421	471	485	563	242	412	446	475
ENSRNOG00000001633	884	281	198	225	336	432	172	407	244	255	345	395	258	216	836	238
ENSRNOG00000001634	0	0	0	0	0	0	0	0	0	0	0	0	0	0	0	0
ENSRNOG00000001640	3235	1251	1297	1262	2151	1608	1066	1217	1995	1172	1284	1889	2218	1569	1419	1369
ENSRNOG00000001642	680	322	364	271	450	373	211	342	289	308	362	293	106	270	395	258
ENSRNOG00000001643	726	415	361	430	436	429	308	501	475	380	461	532	249	309	656	387
ENSRNOG00000001644	10	0	0	4	6	2	0	2	2	0	4	4	0	3	5	3
ENSRNOG00000001645	139	84	72	69	118	91	59	50	77	74	72	118	42	74	222	81
ENSRNOG00000001647	2201	1048	1203	1334	1932	1366	742	817	1602	1408	1308	2110	2013	1120	1194	1244
ENSRNOG00000001651	496	252	395	362	492	250	180	219	410	257	226	415	301	304	270	326
ENSRNOG00000001652	98	50	80	116	49	47	41	42	74	94	86	79	84	57	94	39
ENSRNOG00000001653	324	130	82	121	104	203	119	194	49	52	191	94	23	78	262	85
ENSRNOG00000001654	1005	448	362	409	445	584	277	560	428	357	530	651	655	345	699	362
ENSRNOG00000001656	20	11	14	10	30	4	6	8	10	30	2	8	9	4	5	10
ENSRNOG00000001657	2496	1020	852	1228	1056	1460	927	1630	998	748	1403	1374	608	953	1893	991
ENSRNOG00000001658	347	284	674	638	725	310	236	198	579	356	320	471	315	338	289	542
ENSRNOG00000001662	1516	987	1069	854	1503	963	711	870	957	974	1209	908	523	956	1042	901
ENSRNOG00000001675	0	0	0	0	0	0	0	0	0	0	0	0	0	0	0	0
ENSRNOG00000001679	15	0	1	1	3	4	1	13	0	4	3	5	0	9	10	4
ENSRNOG00000001680	147	142	109	97	101	83	47	105	82	79	77	60	44	91	94	69
ENSRNOG00000001681	571	258	230	385	330	372	193	272	253	297	349	414	197	187	534	254
ENSRNOG00000001682	16784	9552	13187	12197	18059	13571	9672	10965	12851	12174	14952	13744	7173	11120	12687	11300
ENSRNOG00000001684	9	0	3	0	0	7	3	8	16	10	5	7	15	3	11	4
ENSRNOG00000001686	338	314	287	313	267	245	111	194	293	274	202	396	405	179	201	186
ENSRNOG00000001687	440	269	178	126	276	237	139	263	151	165	255	168	39	196	317	162
ENSRNOG00000001688	37	36	39	28	12	26	8	22	15	46	25	30	53	18	8	23
ENSRNOG00000001689	683	233	154	181	243	372	148	222	212	187	283	301	231	210	466	167
ENSRNOG00000001691	0	0	0	0	0	0	0	3	0	0	0	0	0	0	1	0
ENSRNOG00000001692	29	21	24	35	21	23	7	22	22	29	14	23	39	13	32	16
ENSRNOG00000001694	0	0	0	7	2	0	7	1	0	1	2	6	0	3	4	7
ENSRNOG00000001699	288	73	90	90	100	108	38	125	111	128	113	126	70	79	154	73
ENSRNOG00000001700	2033	1375	1183	1725	1063	1529	692	1396	1432	1316	1293	1602	1835	827	1669	812
ENSRNOG00000001701	354	126	88	91	178	147	59	80	210	156	111	225	345	149	111	147
ENSRNOG00000001704	79	64	59	148	57	92	58	66	54	60	59	70	128	45	44	50
ENSRNOG00000001706	9552	6818	9890	11645	10843	7563	5333	3698	11250	8080	7384	11797	10009	5768	7321	8957
ENSRNOG00000001707	2065	1006	1111	1258	706	1443	591	992	971	2070	1662	1426	1226	694	1421	699
ENSRNOG00000001708	1272	736	732	1137	892	631	441	660	922	586	705	1329	1114	588	745	820
ENSRNOG00000001709	21875	8617	9735	13867	12871	11588	6127	7500	12980	10755	9890	15835	13457	8707	18194	10159
ENSRNOG00000001710	2007	1026	1118	1644	1477	1465	705	1275	1409	1287	1332	1843	1568	998	1578	1162
ENSRNOG00000001711	244	119	127	224	105	204	104	113	135	146	172	163	72	98	262	111
ENSRNOG00000001712	580	372	259	507	401	430	210	232	451	280	298	438	508	251	464	318
ENSRNOG00000001713	25	6	4	5	3	12	8	27	6	8	5	3	0	18	24	5
ENSRNOG00000001714	449	386	242	328	236	351	245	495	265	260	302	311	179	224	269	190
ENSRNOG00000001715	978	673	357	484	481	579	260	1175	778	448	564	746	764	657	510	441
ENSRNOG00000001717	2760	1649	2270	2098	3061	1718	1344	1631	2228	1801	1688	2264	1248	1944	1611	2125
ENSRNOG00000001719	5819	3276	3563	4888	4869	3890	2540	3163	4947	3609	3598	5309	3990	2977	4832	3809
ENSRNOG00000001720	244	71	93	133	126	118	73	166	105	91	112	219	210	90	326	127
ENSRNOG00000001724	88	37	89	140	70	69	49	66	108	42	43	123	104	46	40	61
ENSRNOG00000001726	616	330	336	490	302	387	185	245	400	393	362	508	576	251	382	237
ENSRNOG00000001727	512	211	207	292	283	295	156	244	319	242	266	298	280	215	347	214
ENSRNOG00000001728	102	46	67	99	86	82	30	54	84	66	67	113	162	54	134	71
ENSRNOG00000001729	396	235	198	318	353	265	118	245	436	241	235	389	541	249	277	265
ENSRNOG00000001730	1028	653	781	810	1040	699	515	843	759	561	636	971	566	544	607	692
ENSRNOG00000001732	0	0	0	0	1	0	0	0	0	0	0	0	0	0	0	0
ENSRNOG00000001733	2602	1307	608	1182	1193	1389	892	1165	1218	803	1470	1693	1578	1593	1292	1080
ENSRNOG00000001736	985	563	443	690	526	630	356	466	537	532	523	736	826	390	763	439
ENSRNOG00000001738	4672	3541	3476	5048	5000	3483	2100	3384	4860	3436	3429	5598	4547	3332	3409	3878
ENSRNOG00000001739	328	165	276	291	165	257	104	113	195	226	230	194	195	90	419	160
ENSRNOG00000001742	0	0	0	0	0	0	0	0	0	0	0	0	0	0	0	0
ENSRNOG00000001746	316	98	10	10	13	17	3	18	216	13	9	16	16	12	15	110
ENSRNOG00000001747	182	163	185	286	249	205	72	210	313	234	312	366	338	161	114	322
ENSRNOG00000001748	1	0	0	3	0	6	2	0	1	4	1	3	2	0	1	38
ENSRNOG00000001750	321	223	187	195	165	203	47	123	133	348	206	196	156	70	185	63
ENSRNOG00000001752	119	81	66	127	83	103	43	80	88	57	72	108	94	68	145	57
ENSRNOG00000001753	361	231	414	265	343	301	235	197	260	282	353	326	164	219	319	255
ENSRNOG00000001754	185	96	106	115	110	160	53	155	98	94	148	142	108	90	176	70
ENSRNOG00000001756	70	0	2	42	7	1	33	4	2	3	2	6	1	4	7	9
ENSRNOG00000001757	56	23	16	28	41	16	16	19	20	8	14	52	23	25	24	10
ENSRNOG00000001758	476	99	106	177	164	230	93	191	158	124	192	187	230	116	328	132
ENSRNOG00000001762	1869	1187	1035	1475	1314	1132	753	1272	1281	1150	1210	1659	942	858	1374	1037
ENSRNOG00000001764	1539	1024	1039	1335	1222	1001	708	1034	1195	986	1044	1259	655	679	1119	855
ENSRNOG00000001765	12	15	8	10	10	5	2	8	1	11	13	12	0	4	6	2
ENSRNOG00000001766	2398	813	830	480	770	1340	705	1346	581	590	1303	417	175	874	1759	388
ENSRNOG00000001767	609	491	411	763	642	339	327	474	687	418	367	761	747	370	301	438
ENSRNOG00000001769	8082	5447	5156	7191	5598	6752	3271	6717	6258	7714	6913	7147	6657	4359	6191	4303
ENSRNOG00000001770	124	53	40	92	53	48	25	86	60	47	39	86	62	61	85	28
ENSRNOG00000001773	3039	1285	1830	1738	2071	2020	1251	1514	1701	1492	1922	1850	1481	1490	2282	1293
ENSRNOG00000001774	365	295	214	320	297	202	151	301	272	190	176	430	287	201	199	353
ENSRNOG00000001776	0	0	0	0	0	0	0	0	2	0	0	0	0	0	0	1
ENSRNOG00000001777	1	3	0	0	0	0	0	1	0	0	0	0	0	0	0	0
ENSRNOG00000001781	245	183	171	176	151	132	110	147	177	190	164	198	127	138	184	155
ENSRNOG00000001782	679	472	379	576	442	415	261	383	490	310	361	593	466	316	510	466
ENSRNOG00000001783	1822	720	601	687	821	961	559	963	669	609	983	784	591	618	1387	598
ENSRNOG00000001785	2008	1036	1329	1863	2009	1465	770	785	1464	1589	1166	2191	1421	798	1839	1197
ENSRNOG00000001786	1323	585	483	596	556	597	338	691	461	593	646	720	423	509	895	446
ENSRNOG00000001789	1060	860	1071	1180	1244	1053	694	700	991	790	1128	1079	604	773	727	917
ENSRNOG00000001792	28	16	7	7	10	8	8	9	1	8	7	9	15	5	15	9
ENSRNOG00000001793	537	391	484	730	701	285	232	262	484	455	307	696	554	337	347	449
ENSRNOG00000001794	1	0	0	0	0	0	0	0	0	0	0	0	0	0	0	0
ENSRNOG00000001795	1234	1073	870	1471	918	1064	793	1361	1142	908	1123	1409	1171	686	869	865
ENSRNOG00000001796	1002	691	837	889	1490	579	351	545	1097	823	750	1191	722	778	618	840
ENSRNOG00000001797	653	294	355	477	345	470	231	355	408	333	386	536	489	303	540	358
ENSRNOG00000001803	1211	643	623	817	860	838	454	635	787	711	733	1013	575	678	1043	621
ENSRNOG00000001804	1083	717	754	1047	967	789	564	1165	968	650	881	995	658	710	675	797
ENSRNOG00000001806	0	0	0	0	0	0	0	1	1	0	0	0	0	0	0	0
ENSRNOG00000001807	634	574	361	506	460	475	372	710	417	334	504	604	268	389	423	336
ENSRNOG00000001808	612	329	199	258	227	394	191	331	230	269	429	287	148	222	437	204
ENSRNOG00000001809	0	0	0	0	0	0	0	0	0	0	0	0	0	0	0	0
ENSRNOG00000001811	2035	966	1165	1203	1124	1526	892	962	1119	1146	1520	1131	732	894	1885	843
ENSRNOG00000001813	4662	2007	2412	1829	2820	2937	2095	2515	1900	1932	2952	1880	1822	2424	3434	1902
ENSRNOG00000001815	15880	4777	4360	3769	6006	9849	5007	7266	3444	4355	8705	3935	856	6120	13880	3194
ENSRNOG00000001816	275	132	75	47	105	131	109	139	105	63	171	93	26	119	221	76
ENSRNOG00000001817	1575	936	736	1024	914	1000	635	947	966	730	873	1192	1051	652	1243	731
ENSRNOG00000001818	276	191	165	201	316	144	133	239	225	103	195	290	43	203	162	240
ENSRNOG00000001820	259	136	84	96	104	186	83	137	59	76	145	69	23	124	254	62
ENSRNOG00000001821	0	1	0	0	0	1	0	4	0	0	0	19	9	0	1	0
ENSRNOG00000001823	582	317	245	225	430	301	197	335	276	359	257	399	121	197	506	219
ENSRNOG00000001825	69	58	16	11	53	18	16	34	39	22	39	55	21	51	32	37
ENSRNOG00000001827	680	643	506	716	684	546	344	534	575	441	532	718	396	427	537	549
ENSRNOG00000001828	540	405	354	408	489	297	180	244	361	298	240	488	299	251	373	282
ENSRNOG00000001829	2173	392	331	105	404	1886	1062	1421	124	286	1864	51	83	692	2144	202
ENSRNOG00000001830	8	0	5	0	2	2	0	4	1	3	2	3	0	0	7	3
ENSRNOG00000001833	297	133	162	156	157	173	104	155	132	88	149	145	156	97	253	121
ENSRNOG00000001834	506	288	240	368	339	276	203	268	380	168	225	471	391	193	373	234
ENSRNOG00000001837	4487	645	902	1386	1049	1375	385	991	1081	1090	1095	1765	2376	904	2194	782
ENSRNOG00000001839	0	0	0	0	0	0	0	0	0	0	0	0	0	0	0	0
ENSRNOG00000001840	2	0	0	0	5	1	0	2	0	0	2	0	0	5	4	0
ENSRNOG00000001842	820	419	344	462	473	492	363	479	443	388	449	524	429	451	733	351
ENSRNOG00000001843	635	342	297	328	395	412	270	315	378	263	325	518	369	327	586	383
ENSRNOG00000001844	387	350	442	467	454	332	255	317	468	321	315	532	437	317	249	364
ENSRNOG00000001845	931	454	429	474	536	444	272	400	482	594	440	622	575	432	590	428
ENSRNOG00000001847	938	545	574	798	591	674	478	694	648	517	656	907	791	427	724	520
ENSRNOG00000001849	11640	5437	6254	6840	8294	6373	4574	4360	7723	4948	5808	7786	5863	6029	6995	6223
ENSRNOG00000001851	645	208	404	362	541	374	229	216	387	345	314	407	163	339	456	353
ENSRNOG00000001852	417	163	134	187	174	307	171	211	112	169	331	125	50	239	315	105
ENSRNOG00000001854	537	670	810	1111	971	563	435	525	885	649	467	977	704	508	368	808
ENSRNOG00000001858	78	26	43	57	44	36	17	52	45	40	49	119	17	39	45	44
ENSRNOG00000001859	360	238	168	249	206	309	162	258	222	182	194	314	316	161	307	166
ENSRNOG00000001860	21	24	17	7	9	7	0	11	14	26	8	19	20	4	10	5
ENSRNOG00000001861	916	441	295	479	395	543	206	376	551	434	430	726	783	393	747	349
ENSRNOG00000001862	4224	2172	1728	2054	2146	2658	1532	2498	1998	1918	2331	2932	1899	1853	3590	1581
ENSRNOG00000001863	133	132	126	203	212	125	82	134	154	186	169	171	147	104	124	147
ENSRNOG00000001864	326	219	237	240	294	230	82	213	279	340	229	304	366	251	182	174
ENSRNOG00000001865	2	7	0	0	3	8	1	5	1	8	4	8	0	0	3	0
ENSRNOG00000001866	7970	5203	6532	7394	9461	5223	4285	3993	8659	5783	5415	8293	5825	5161	5786	6716
ENSRNOG00000001867	1123	477	513	539	756	762	433	669	618	576	693	736	390	528	979	502
ENSRNOG00000001868	293	334	277	463	397	233	179	274	350	221	202	549	548	219	147	352
ENSRNOG00000001869	26	6	10	12	12	19	7	16	6	31	11	24	15	9	18	15
ENSRNOG00000001870	2187	1453	1276	1589	1560	1570	837	1240	1497	1342	1499	1973	1454	1082	1616	1254
ENSRNOG00000001872	72	25	37	16	36	12	8	74	44	22	19	65	12	38	17	27
ENSRNOG00000001873	243	114	62	114	113	90	42	277	147	149	112	168	68	95	95	85
ENSRNOG00000001874	1307	563	630	843	910	682	358	487	929	742	661	1070	1143	694	857	644
ENSRNOG00000001875	662	331	279	380	372	348	158	305	343	342	341	485	362	264	414	233
ENSRNOG00000001876	74	23	8	3	29	25	7	31	21	32	15	40	15	25	25	20
ENSRNOG00000001877	1745	819	905	1131	1049	952	504	621	1160	952	872	1332	1731	659	1396	791
ENSRNOG00000001878	1952	798	1010	1318	1248	1049	539	1034	1265	1074	984	1466	1366	854	1623	1035
ENSRNOG00000001880	2771	1328	1168	1900	1255	1931	839	1074	1508	1600	1533	2015	2675	996	2474	935
ENSRNOG00000001884	1794	986	921	1167	1214	1501	799	1392	1027	1111	1380	1404	1574	788	1505	885
ENSRNOG00000001885	525	178	158	250	228	264	119	269	261	240	266	407	303	187	368	217
ENSRNOG00000001886	916	456	462	425	540	662	327	476	485	457	514	585	302	388	650	381
ENSRNOG00000001888	1492	792	688	976	845	902	437	695	1013	935	850	1192	1364	638	1211	727
ENSRNOG00000001889	1176	610	498	736	614	745	368	593	720	497	737	898	626	495	889	572
ENSRNOG00000001890	519	203	242	318	267	244	137	247	293	245	258	340	376	182	388	272
ENSRNOG00000001891	171	94	71	103	167	100	75	128	104	82	115	169	120	79	164	104
ENSRNOG00000001892	31	2	29	76	10	39	8	9	51	70	25	41	31	14	42	22
ENSRNOG00000001893	1185	610	530	703	473	763	328	520	673	468	639	699	690	424	909	543
ENSRNOG00000001908	114	133	46	82	42	67	57	102	53	22	95	95	19	63	97	53
ENSRNOG00000001911	1584	1106	984	1612	1012	1129	600	951	1088	1070	1044	1353	1170	708	1036	785
ENSRNOG00000001912	0	0	0	0	0	0	0	0	0	0	0	0	0	0	1	0
ENSRNOG00000001915	48	19	4	0	12	5	8	47	13	27	16	5	5	8	7	11
ENSRNOG00000001916	0	0	0	0	0	0	0	0	0	0	0	0	0	0	0	0
ENSRNOG00000001918	0	0	0	0	0	0	0	0	0	0	0	0	0	0	0	0
ENSRNOG00000001923	0	0	0	0	0	0	0	0	0	0	0	0	0	0	0	0
ENSRNOG00000001924	1	0	0	0	0	0	0	4	0	0	0	0	0	0	7	0
ENSRNOG00000001925	45	43	17	47	31	28	22	33	18	30	49	49	32	14	37	22
ENSRNOG00000001926	11	10	8	2	14	7	6	23	3	16	13	40	14	2	25	18
ENSRNOG00000001928	621	316	360	464	562	327	181	367	347	320	314	586	367	264	390	328
ENSRNOG00000001930	365	321	299	386	437	228	205	308	247	184	270	438	349	211	244	327
ENSRNOG00000001931	2107	803	1256	1377	1358	1325	707	915	952	976	1077	1263	565	1101	1889	1198
ENSRNOG00000001932	0	0	0	0	0	0	0	0	0	0	0	0	0	0	0	0
ENSRNOG00000001942	0	0	0	0	0	0	0	0	0	0	2	0	0	1	1	0
ENSRNOG00000001943	0	0	0	1	1	3	0	0	0	0	7	0	0	1	0	0
ENSRNOG00000001945	0	0	0	0	0	0	0	0	0	0	0	0	0	0	0	0
ENSRNOG00000001948	0	0	0	0	0	0	0	0	0	0	0	0	0	0	0	0
ENSRNOG00000001949	0	0	0	0	0	0	0	0	0	0	0	0	0	0	0	0
ENSRNOG00000001950	0	0	0	0	0	0	0	0	0	0	0	0	0	0	0	0
ENSRNOG00000001951	0	0	0	0	0	0	0	0	0	0	0	0	0	0	0	0
ENSRNOG00000001953	109	70	82	118	98	86	37	75	100	86	72	175	108	66	178	119
ENSRNOG00000001955	0	0	0	0	0	0	0	0	0	0	0	0	0	0	0	0
ENSRNOG00000001956	1135	557	473	488	854	560	479	707	523	354	572	605	238	522	587	507
ENSRNOG00000001957	0	0	0	0	0	0	0	0	0	0	0	0	0	0	0	0
ENSRNOG00000001958	1125	498	648	672	731	860	580	541	678	684	772	803	621	680	949	585
ENSRNOG00000001959	64	55	14	39	35	35	30	39	15	23	53	34	42	32	114	34
ENSRNOG00000001960	690	155	60	63	90	467	337	689	97	108	386	77	32	122	404	68
ENSRNOG00000001962	10	16	1	5	8	15	1	4	11	0	0	2	4	7	13	4
ENSRNOG00000001963	630	202	209	212	454	599	473	692	437	295	810	647	236	457	312	355
ENSRNOG00000001964	1126	590	646	880	891	603	446	496	810	586	535	989	714	603	710	673
ENSRNOG00000001966	377	424	260	419	564	162	250	478	422	130	194	476	427	275	172	565
ENSRNOG00000001967	0	0	0	0	0	0	0	1	0	0	1	0	0	0	0	0
ENSRNOG00000001971	228	141	167	149	187	82	78	126	192	110	111	144	120	77	100	123
ENSRNOG00000001973	0	0	0	0	0	0	0	0	0	0	0	0	0	0	0	0
ENSRNOG00000001974	9	0	0	0	0	0	1	3	2	8	1	0	0	1	3	6
ENSRNOG00000001975	0	0	0	0	0	0	0	0	0	0	0	0	0	0	0	0
ENSRNOG00000001976	3	0	0	0	1	0	1	5	0	0	0	4	0	2	0	0
ENSRNOG00000001979	2391	1085	961	1132	1103	1445	722	1051	1304	1037	1146	1540	1413	1011	1688	945
ENSRNOG00000001980	0	0	0	0	0	0	0	0	0	0	0	0	0	0	0	0
ENSRNOG00000001982	223	152	176	211	210	97	93	150	205	141	136	302	175	136	165	159
ENSRNOG00000001984	0	0	0	0	0	0	0	0	0	0	0	0	0	1	0	0
ENSRNOG00000001986	0	0	0	0	0	0	0	0	0	0	0	0	0	0	0	0
ENSRNOG00000001989	4671	2138	1888	1151	2117	2274	1685	1971	1746	1406	2431	1570	1495	2201	2678	1911
ENSRNOG00000001990	3	0	0	0	0	3	0	0	0	0	3	0	0	0	1	1
ENSRNOG00000001991	4953	2636	2163	3624	2905	3518	1666	2722	3174	2311	2773	4357	3290	2287	4664	2458
ENSRNOG00000001992	14134	5302	6557	7929	10655	7213	5255	5929	7483	5515	6646	8952	4877	6406	11638	6970
ENSRNOG00000001996	1670	742	573	590	861	901	634	918	614	466	1020	888	674	710	1214	598
ENSRNOG00000002001	2028	1685	1903	2709	2461	1583	1392	1618	2643	1663	1907	2669	1738	1366	1486	2243
ENSRNOG00000002002	0	0	0	0	0	0	0	0	0	0	0	0	0	0	0	0
ENSRNOG00000002004	572	308	440	524	514	537	306	258	603	565	505	714	756	355	551	486
ENSRNOG00000002005	0	0	0	0	0	0	0	0	0	0	0	0	0	0	0	0
ENSRNOG00000002006	0	0	0	0	0	0	0	0	0	0	0	0	0	0	0	0
ENSRNOG00000002010	566	211	194	190	247	299	122	222	166	156	174	296	292	180	485	152
ENSRNOG00000002011	1	0	1	0	0	1	2	1	1	0	4	0	0	0	0	2
ENSRNOG00000002012	236	111	65	96	74	76	33	98	65	111	93	90	60	50	140	58
ENSRNOG00000002013	2417	1065	1811	1641	2036	1464	914	768	1498	1522	1400	2034	1237	1002	2491	1353
ENSRNOG00000002014	13	1	2	0	4	10	2	4	0	0	1	0	0	3	3	0
ENSRNOG00000002021	6582	3816	3792	3845	5359	4081	2814	3937	3702	3011	4175	4045	2385	3247	3914	3769
ENSRNOG00000002024	1746	964	1366	1234	1876	1384	890	853	1807	903	1304	1665	1132	1370	1371	1424
ENSRNOG00000002026	203	154	148	162	147	186	104	130	154	185	216	181	90	138	156	115
ENSRNOG00000002028	4098	1376	1483	1762	1736	2261	1060	1843	1636	1528	1843	2287	1928	1532	3686	1438
ENSRNOG00000002029	6	2	15	13	11	7	10	10	21	12	7	11	0	14	9	11
ENSRNOG00000002031	11	2	0	0	0	10	4	16	17	0	22	4	7	3	10	5
ENSRNOG00000002032	1227	567	604	811	637	719	329	568	710	554	622	962	715	552	1196	508
ENSRNOG00000002034	0	0	0	0	0	0	0	0	0	0	0	0	0	0	0	0
ENSRNOG00000002035	781	403	336	529	438	413	290	412	568	358	384	586	584	333	463	379
ENSRNOG00000002036	563	239	195	180	264	251	134	358	177	182	257	242	191	172	286	152
ENSRNOG00000002039	649	349	506	571	569	445	308	553	471	359	456	578	245	424	387	439
ENSRNOG00000002040	835	618	491	605	719	496	409	673	607	425	527	828	530	410	463	582
ENSRNOG00000002041	972	649	566	982	501	583	332	263	657	627	600	747	832	258	694	501
ENSRNOG00000002042	0	18	1	0	0	0	0	0	0	0	0	0	0	0	0	0
ENSRNOG00000002044	260	58	46	78	51	115	68	92	70	59	80	93	167	80	179	24
ENSRNOG00000002045	2421	1260	765	1177	1000	1356	955	1640	1225	816	1271	1643	606	838	2253	1101
ENSRNOG00000002046	0	0	0	0	0	0	0	0	0	0	0	0	0	0	0	0
ENSRNOG00000002050	2943	1115	883	1833	953	1557	787	1027	1326	1277	1394	2293	1406	860	2617	978
ENSRNOG00000002051	6970	3749	5469	5752	8120	4005	3030	3415	6158	3739	3707	5998	3721	4292	4328	5477
ENSRNOG00000002052	375	496	160	299	272	279	166	290	261	183	278	338	160	167	423	232
ENSRNOG00000002053	218	232	297	324	332	178	129	173	237	140	178	311	393	185	105	299
ENSRNOG00000002054	377	153	131	97	199	283	152	193	86	197	229	128	80	164	281	132
ENSRNOG00000002055	692	334	328	382	387	366	190	302	428	426	325	504	339	282	510	262
ENSRNOG00000002057	13	19	4	1	14	17	3	18	20	28	18	28	17	8	20	27
ENSRNOG00000002061	606	565	377	467	517	451	269	436	447	316	471	571	426	324	482	380
ENSRNOG00000002069	742	335	277	300	422	431	217	276	299	229	362	365	67	344	540	264
ENSRNOG00000002070	67	67	76	40	103	78	38	49	55	66	74	28	10	64	75	44
ENSRNOG00000002072	46	19	14	22	16	22	7	30	18	11	22	33	12	10	53	9
ENSRNOG00000002073	0	0	0	2	1	0	2	1	0	0	1	0	0	0	0	0
ENSRNOG00000002074	137	126	113	126	86	74	53	119	107	81	101	196	49	63	72	74
ENSRNOG00000002075	508	186	150	135	189	329	253	296	117	93	317	107	56	176	317	163
ENSRNOG00000002079	5791	3317	5645	6869	6277	4468	3240	2167	5627	4432	4226	5683	3665	3335	4728	4413
ENSRNOG00000002080	498	289	251	319	346	248	136	307	341	331	309	384	390	237	311	312
ENSRNOG00000002084	0	0	0	0	0	0	1	0	0	0	2	0	0	0	0	0
ENSRNOG00000002085	17	5	1	0	8	2	1	4	1	0	4	1	0	0	7	0
ENSRNOG00000002089	1242	463	388	551	525	678	435	460	475	546	675	638	664	483	1013	471
ENSRNOG00000002091	404	118	137	126	269	178	118	232	114	112	231	187	80	161	269	144
ENSRNOG00000002092	180	161	246	328	185	124	84	74	192	169	108	193	196	66	125	217
ENSRNOG00000002093	440	555	286	659	403	219	205	195	437	260	244	567	422	238	269	330
ENSRNOG00000002094	1653	752	706	1019	813	960	639	835	591	790	1038	822	826	672	1392	653
ENSRNOG00000002095	195	127	73	129	95	127	46	275	88	58	123	128	87	76	147	63
ENSRNOG00000002097	1843	745	1057	1695	1042	1135	530	412	1171	1155	995	1630	1434	746	2228	973
ENSRNOG00000002099	5459	4547	5681	6127	7741	4483	3117	4631	6479	4753	4974	6282	5789	3949	3635	5723
ENSRNOG00000002100	1587	876	693	719	805	656	424	704	798	714	672	893	318	619	775	526
ENSRNOG00000002101	408	190	262	285	325	263	120	281	283	150	250	296	136	202	296	245
ENSRNOG00000002104	968	655	486	641	729	567	395	532	673	557	494	826	786	443	702	505
ENSRNOG00000002105	168	43	65	119	84	60	36	64	92	70	77	88	76	61	96	74
ENSRNOG00000002106	5250	2131	2113	1914	2968	2976	1891	2422	1782	1888	3200	2183	849	2534	4720	1967
ENSRNOG00000002110	25	22	8	17	16	16	10	11	9	7	11	22	3	7	14	20
ENSRNOG00000002112	1566	1031	1064	1062	1532	1300	952	922	1236	903	1225	1152	689	963	1174	1142
ENSRNOG00000002115	4472	2273	1687	2558	2248	2504	1661	2113	2581	1953	2043	3207	2463	1983	3696	2123
ENSRNOG00000002116	2	0	0	0	0	0	0	1	0	4	0	4	3	0	0	0
ENSRNOG00000002117	6	4	0	0	2	1	0	5	1	0	1	2	4	15	23	5
ENSRNOG00000002120	82	21	2	0	44	9	2	90	1	18	7	54	0	17	1	12
ENSRNOG00000002121	1307	715	647	760	856	707	451	759	803	697	783	984	752	636	1023	662
ENSRNOG00000002122	285	295	218	349	432	187	152	145	347	212	192	438	417	185	188	359
ENSRNOG00000002125	10932	6513	5387	6655	5907	8515	6540	7311	5713	5214	8777	6520	3989	5235	10461	5388
ENSRNOG00000002126	1298	748	1082	949	1960	723	907	832	981	478	786	1130	525	1081	714	1186
ENSRNOG00000002127	1	0	0	0	1	0	1	6	0	0	0	4	0	0	0	0
ENSRNOG00000002128	943	395	409	419	554	549	379	465	407	406	529	526	558	420	597	433
ENSRNOG00000002129	1115	1034	1247	1494	1390	744	571	481	1405	754	632	1356	1192	675	587	988
ENSRNOG00000002130	0	0	0	1	0	0	2	0	1	0	0	0	0	0	0	0
ENSRNOG00000002134	60	46	14	11	59	25	22	78	26	21	46	64	24	40	41	33
ENSRNOG00000002135	3467	1525	1180	1242	1509	2169	1518	2524	1369	1342	2268	1855	1025	1399	2527	1025
ENSRNOG00000002137	406	147	117	142	149	152	54	190	118	132	174	217	160	118	181	118
ENSRNOG00000002139	2640	1689	1528	1909	2159	1416	1070	2429	2398	1355	1546	2429	2315	1521	1704	1565
ENSRNOG00000002141	3385	1284	1335	1428	1793	1779	875	1867	1371	1074	1727	1650	1006	1534	2501	1233
ENSRNOG00000002142	3177	1668	2304	3134	2866	2401	1378	1528	2511	2563	2265	3107	2218	1654	3092	1923
ENSRNOG00000002144	860	404	436	577	697	457	320	407	549	475	395	700	391	383	593	440
ENSRNOG00000002145	60	46	13	26	16	21	7	40	15	25	54	27	9	12	51	22
ENSRNOG00000002146	1023	592	393	597	551	593	368	641	544	500	650	766	496	449	692	447
ENSRNOG00000002149	3	7	0	0	0	1	1	3	3	0	10	0	11	6	4	2
ENSRNOG00000002151	7672	2711	3756	5827	4245	4336	2120	2527	4027	3654	3750	6074	3853	2460	7536	3270
ENSRNOG00000002152	2242	939	931	936	1323	1458	823	1358	1107	1005	1480	1177	547	1134	1767	1037
ENSRNOG00000002153	154	52	83	71	105	71	58	103	63	70	93	91	40	65	93	69
ENSRNOG00000002154	81	16	25	30	33	49	13	34	30	35	46	46	8	24	76	51
ENSRNOG00000002156	0	0	0	0	0	0	0	0	0	0	0	0	0	0	0	0
ENSRNOG00000002158	46	2	33	49	31	55	16	7	12	38	34	28	6	5	19	18
ENSRNOG00000002159	101	75	43	52	61	67	45	59	73	23	55	107	30	39	50	24
ENSRNOG00000002161	46	18	5	4	14	20	17	37	2	11	38	0	4	22	55	15
ENSRNOG00000002163	981	474	362	454	492	605	336	680	363	329	546	648	456	360	780	324
ENSRNOG00000002164	13	9	4	6	12	8	4	13	5	15	3	2	13	6	11	0
ENSRNOG00000002165	89	7	17	27	29	31	15	30	29	15	27	21	12	23	43	19
ENSRNOG00000002167	4	0	1	19	5	1	5	3	0	1	3	3	0	0	9	1
ENSRNOG00000002168	0	0	2	4	1	0	2	0	0	1	0	3	0	1	0	1
ENSRNOG00000002169	12	1	3	0	0	10	6	7	1	0	6	2	0	13	8	5
ENSRNOG00000002171	141	209	75	88	100	114	65	75	75	64	115	85	72	74	164	85
ENSRNOG00000002174	6	6	1	5	0	3	0	5	0	2	5	4	3	0	4	0
ENSRNOG00000002175	305	139	193	111	214	160	177	234	120	99	165	206	66	178	164	130
ENSRNOG00000002176	307	304	230	263	246	146	131	195	193	167	238	295	113	187	239	169
ENSRNOG00000002177	281	91	77	55	70	134	64	166	66	91	161	86	66	84	206	87
ENSRNOG00000002178	528	378	221	225	286	513	278	336	249	263	383	318	130	268	509	219
ENSRNOG00000002180	513	311	497	458	420	363	230	295	344	429	322	515	332	263	361	330
ENSRNOG00000002181	266	141	114	171	232	132	76	116	159	138	148	199	178	127	212	120
ENSRNOG00000002182	3321	1742	1839	1930	2262	2027	1310	1449	2042	1825	2028	2476	1601	1710	2550	2229
ENSRNOG00000002185	528	268	234	234	264	329	270	261	275	280	392	282	197	202	454	177
ENSRNOG00000002186	1670	632	687	1110	740	978	506	696	1027	835	906	1180	1250	604	1252	617
ENSRNOG00000002187	1	2	0	0	1	0	0	0	0	0	0	7	0	0	0	0
ENSRNOG00000002188	101	39	30	64	27	28	21	30	39	61	45	40	34	32	59	29
ENSRNOG00000002190	450	339	469	293	618	363	269	171	440	366	361	408	170	366	338	535
ENSRNOG00000002191	299	199	110	165	163	212	155	198	149	94	207	229	150	118	352	125
ENSRNOG00000002192	251	173	122	231	141	171	91	118	170	97	155	161	79	75	170	104
ENSRNOG00000002194	1709	717	810	1138	935	1074	431	646	1096	918	845	1403	1747	719	1248	710
ENSRNOG00000002195	0	0	0	0	0	0	0	0	0	0	0	0	0	0	0	0
ENSRNOG00000002196	481	232	349	305	553	392	210	242	435	441	409	542	193	347	547	424
ENSRNOG00000002198	103	32	49	44	45	45	29	44	31	38	63	14	10	37	46	36
ENSRNOG00000002199	0	0	2	0	0	5	0	0	0	0	0	0	0	0	1	0
ENSRNOG00000002200	10	19	19	10	13	7	9	12	13	14	10	7	7	11	12	13
ENSRNOG00000002201	24	16	26	12	24	5	4	7	16	6	9	12	0	4	23	5
ENSRNOG00000002202	192	128	171	338	241	219	111	83	236	150	175	256	284	117	242	169
ENSRNOG00000002203	479	220	227	326	264	315	237	298	261	187	288	289	238	168	395	154
ENSRNOG00000002204	33	2	14	24	24	23	11	33	301	10	38	13	0	13	23	21
ENSRNOG00000002205	6941	2581	2948	3063	3584	4047	2210	2945	2846	2771	3375	3523	2323	2740	5838	2585
ENSRNOG00000002207	719	278	198	169	284	564	281	354	228	200	505	203	196	347	464	169
ENSRNOG00000002208	210	164	140	226	260	129	86	125	238	150	184	329	227	117	234	188
ENSRNOG00000002209	2332	957	854	588	1222	1531	1171	1757	591	703	1527	595	114	869	1823	616
ENSRNOG00000002210	1032	761	361	704	514	545	411	555	592	398	472	692	259	381	861	385
ENSRNOG00000002211	4	1	1	4	3	5	4	0	4	1	3	6	1	5	2	1
ENSRNOG00000002212	119	59	101	165	40	125	65	30	51	78	67	96	36	30	172	23
ENSRNOG00000002214	1853	806	1114	1258	1354	1162	630	888	1278	985	1120	1497	1277	1020	1350	860
ENSRNOG00000002215	732	509	379	493	371	552	419	376	506	308	575	417	346	312	754	350
ENSRNOG00000002216	454	245	204	273	266	215	118	187	231	242	251	342	223	163	340	180
ENSRNOG00000002217	54	4	22	46	9	52	28	2	16	0	19	46	9	1	20	23
ENSRNOG00000002218	132	80	47	77	98	105	42	110	99	43	57	92	37	53	94	46
ENSRNOG00000002223	0	0	0	0	0	0	0	0	0	0	0	0	0	0	0	0
ENSRNOG00000002224	2	0	0	0	0	0	0	0	2	0	0	2	0	0	1	0
ENSRNOG00000002225	4119	3152	2684	3048	3964	2695	1775	3429	3230	2423	2649	3774	2358	2696	2456	2968
ENSRNOG00000002227	597	462	426	486	601	260	167	271	572	283	269	597	384	311	361	416
ENSRNOG00000002229	14602	7380	6214	6882	8417	9426	4954	6291	15303	7829	7130	10198	17205	9900	3746	7462
ENSRNOG00000002232	190	237	208	364	235	167	142	134	265	174	125	291	358	137	151	211
ENSRNOG00000002233	0	0	0	0	0	0	0	2	1	0	2	0	0	0	0	0
ENSRNOG00000002238	452	287	228	273	320	227	87	232	332	253	252	349	367	289	308	277
ENSRNOG00000002240	1970	952	808	1325	1100	989	594	965	1149	903	937	1559	1434	849	1507	882
ENSRNOG00000002241	169	48	60	62	78	74	50	45	86	62	59	89	103	70	100	72
ENSRNOG00000002243	4	0	2	3	1	4	0	3	0	0	2	0	5	1	1	1
ENSRNOG00000002244	2989	2097	1469	1858	2035	1499	1101	2298	2004	1116	1618	2942	1163	1163	1837	1881
ENSRNOG00000002246	6247	2822	2482	2593	3150	4114	2345	3658	2505	2737	3886	2918	2084	2709	5397	2134
ENSRNOG00000002247	327	176	149	134	166	196	110	184	137	151	177	182	115	129	305	101
ENSRNOG00000002248	1005	924	912	1067	1393	649	482	986	1227	713	665	1254	646	689	525	1029
ENSRNOG00000002251	1883	1058	997	1536	1431	963	595	904	1378	925	797	1712	1570	824	1507	1054
ENSRNOG00000002253	53	37	16	13	20	52	16	32	24	11	53	14	7	22	50	12
ENSRNOG00000002254	1105	568	463	577	715	816	662	967	594	414	865	769	594	421	755	509
ENSRNOG00000002255	1706	904	765	1078	878	1387	656	1007	946	948	1287	1268	780	749	1497	704
ENSRNOG00000002256	250	110	86	131	99	120	84	97	82	95	104	216	113	43	177	76
ENSRNOG00000002258	1241	516	603	501	977	648	337	1077	642	798	855	1082	739	736	924	648
ENSRNOG00000002262	2207	1083	1001	1132	1157	1169	620	1011	990	894	1059	1450	1410	795	1588	848
ENSRNOG00000002265	34	13	13	17	38	12	14	22	30	15	12	51	63	23	16	27
ENSRNOG00000002266	11	6	2	0	1	2	0	8	5	0	4	5	1	0	6	0
ENSRNOG00000002267	259	66	41	111	104	145	70	95	102	55	142	152	155	93	163	63
ENSRNOG00000002270	3452	1421	1209	1625	1594	1678	1080	1561	1224	1251	1887	1944	1626	1400	2412	1061
ENSRNOG00000002271	1076	579	555	819	687	709	506	650	609	613	655	773	709	506	791	503
ENSRNOG00000002272	833	279	318	350	363	437	244	375	285	291	469	454	320	330	756	325
ENSRNOG00000002273	351	243	136	220	162	197	111	225	163	90	146	251	235	123	259	99
ENSRNOG00000002275	1292	740	659	773	878	636	484	742	698	620	729	895	696	689	1018	743
ENSRNOG00000002276	106	73	64	52	72	60	50	50	48	29	50	70	72	51	49	40
ENSRNOG00000002277	4829	3163	3560	3581	4700	3568	2501	2954	4000	2737	3531	4282	3382	2999	3400	3458
ENSRNOG00000002278	241	134	132	166	156	166	84	124	112	176	246	191	80	137	310	180
ENSRNOG00000002280	3213	1161	686	909	836	2819	1904	2975	728	755	2974	1175	465	1118	2928	569
ENSRNOG00000002282	22	8	3	20	9	6	4	14	10	2	15	17	12	9	10	7
ENSRNOG00000002285	0	1	1	0	0	0	0	0	0	0	0	0	0	2	0	0
ENSRNOG00000002286	113	76	134	195	163	91	61	58	169	61	63	202	225	96	41	155
ENSRNOG00000002289	2	0	1	0	0	3	3	2	0	0	1	2	0	0	3	7
ENSRNOG00000002291	137	98	60	58	114	81	74	80	77	60	120	58	32	105	70	70
ENSRNOG00000002292	3416	1819	1706	2106	1949	2277	1772	2169	1757	1728	2347	2254	2736	1939	2534	1711
ENSRNOG00000002294	444	428	349	534	477	335	280	496	510	394	356	570	478	316	271	420
ENSRNOG00000002296	356	160	120	110	159	146	86	205	153	232	172	209	85	87	182	131
ENSRNOG00000002299	0	0	0	0	0	0	0	0	0	3	0	0	0	0	0	0
ENSRNOG00000002301	3463	1614	1514	1734	2014	2289	1351	1901	1753	1689	2239	2051	1315	1500	2938	1463
ENSRNOG00000002302	2	0	0	0	6	0	2	0	0	0	0	1	8	1	1	0
ENSRNOG00000002303	574	272	504	682	597	458	201	263	486	572	474	567	706	330	445	446
ENSRNOG00000002304	2	5	0	9	0	0	0	0	5	0	7	1	0	2	1	0
ENSRNOG00000002305	3128	1350	1240	1241	1482	1838	1337	1612	1359	1149	1987	1400	369	1024	2213	1254
ENSRNOG00000002309	24	23	11	23	18	14	7	15	10	2	8	23	36	7	31	3
ENSRNOG00000002312	114	67	70	73	116	69	45	90	83	96	93	101	52	52	70	79
ENSRNOG00000002314	450	253	220	288	230	370	237	285	245	226	300	287	124	191	332	156
ENSRNOG00000002316	2	0	0	0	0	1	0	7	0	0	0	1	0	0	6	0
ENSRNOG00000002318	3170	2342	2095	2544	2571	2021	1605	2398	2455	1587	2011	2923	2126	1972	1866	2140
ENSRNOG00000002319	585	437	404	536	542	355	244	413	535	385	384	652	623	401	421	502
ENSRNOG00000002320	1524	549	439	596	521	1017	458	844	467	546	927	591	601	522	1275	384
ENSRNOG00000002321	66	24	14	38	20	55	30	27	26	12	31	18	50	25	41	9
ENSRNOG00000002322	762	887	442	610	492	683	492	524	583	563	771	575	489	517	654	457
ENSRNOG00000002323	459	193	267	183	358	273	212	267	174	169	289	185	314	244	297	166
ENSRNOG00000002327	384	293	374	369	614	315	248	481	433	178	378	480	350	342	150	533
ENSRNOG00000002331	49	24	24	9	15	22	12	13	36	0	21	27	2	23	32	17
ENSRNOG00000002332	162	67	48	22	39	92	52	91	20	30	99	18	6	50	136	28
ENSRNOG00000002333	0	0	0	0	0	0	0	0	0	0	0	0	0	0	0	0
ENSRNOG00000002335	217	94	15	13	149	22	34	76	24	108	85	28	27	15	21	25
ENSRNOG00000002336	1973	721	913	964	1041	1271	696	507	1106	741	1122	1237	1286	1006	1179	770
ENSRNOG00000002338	804	511	851	886	1109	531	448	514	1020	622	515	935	852	599	533	880
ENSRNOG00000002339	2022	842	1149	1263	1370	1247	645	938	1089	1069	1114	1385	1333	1090	1540	967
ENSRNOG00000002340	0	0	0	0	0	0	0	0	0	0	0	0	0	0	0	0
ENSRNOG00000002341	54	70	14	29	44	22	13	33	34	29	31	46	23	16	28	36
ENSRNOG00000002342	1984	1081	916	1231	1192	1230	750	1340	1226	858	1212	1506	1280	782	1441	864
ENSRNOG00000002343	24040	7078	8100	11284	11821	10716	4285	8087	12169	9268	8647	15832	16923	8327	20050	8977
ENSRNOG00000002345	701	516	676	794	732	364	261	219	691	508	468	657	603	399	552	674
ENSRNOG00000002346	1	0	0	0	4	3	0	0	0	0	0	0	0	0	0	0
ENSRNOG00000002347	2757	1740	1814	2174	2165	1961	1359	1570	2589	1768	1941	2640	2383	1864	1850	1809
ENSRNOG00000002349	1607	728	704	555	975	911	680	928	580	590	822	592	148	876	842	689
ENSRNOG00000002350	14	6	4	2	14	4	5	8	13	10	11	2	0	4	14	7
ENSRNOG00000002352	538	203	204	411	231	329	163	286	211	195	289	308	405	164	503	215
ENSRNOG00000002353	1549	1016	1029	1104	1416	967	586	884	1175	918	887	1459	822	818	1101	969
ENSRNOG00000002355	44	37	20	41	35	26	9	26	10	12	14	23	14	7	106	24
ENSRNOG00000002358	1121	622	336	704	626	745	377	617	651	416	626	764	379	426	901	513
ENSRNOG00000002360	1609	639	448	413	681	1073	806	1753	355	358	1225	393	66	716	795	344
ENSRNOG00000002361	311	260	208	251	271	253	231	233	211	182	262	301	149	260	320	228
ENSRNOG00000002364	5485	2509	3083	3732	2784	3092	1375	1883	3476	3462	2779	3677	4054	1972	4004	2326
ENSRNOG00000002365	1110	437	389	477	351	609	227	451	342	454	546	421	512	285	1208	305
ENSRNOG00000002368	610	494	578	600	625	504	309	509	707	368	380	796	493	399	459	498
ENSRNOG00000002369	2211	1195	1442	1273	1596	1434	750	925	1562	1469	1259	1417	1237	1457	971	1085
ENSRNOG00000002372	16	15	16	32	15	11	8	19	10	11	14	10	13	20	13	31
ENSRNOG00000002373	1658	956	777	1122	995	934	545	636	1150	885	896	1227	1148	923	1147	896
ENSRNOG00000002376	1627	954	1178	1379	1566	985	636	976	1318	1136	917	1463	1184	907	1029	1060
ENSRNOG00000002378	1769	760	754	1182	1026	978	604	799	987	735	960	1350	912	760	1584	736
ENSRNOG00000002379	0	0	0	0	0	0	0	0	0	0	0	0	0	0	0	0
ENSRNOG00000002381	204	94	191	185	223	98	113	39	141	124	89	220	235	126	120	172
ENSRNOG00000002382	0	0	0	0	0	0	0	0	0	0	0	0	0	0	0	0
ENSRNOG00000002385	172	190	53	51	82	185	29	39	54	25	133	65	35	41	143	76
ENSRNOG00000002387	973	248	221	237	305	473	221	448	258	167	459	378	137	274	879	215
ENSRNOG00000002388	2471	1904	1753	2327	1902	2054	1111	1528	2203	2128	2140	2338	2470	1651	2199	1724
ENSRNOG00000002389	6554	1877	1611	1852	2766	3236	1421	2786	1823	1694	2927	2521	1396	2403	5445	1945
ENSRNOG00000002390	6057	3757	2473	4294	3433	3765	2343	3538	3900	3057	3342	5201	3181	2745	5822	3013
ENSRNOG00000002391	15	7	6	5	14	0	4	7	7	14	3	3	0	4	4	1
ENSRNOG00000002393	3277	1888	1980	2460	2765	2123	1266	1941	2353	1731	2045	2382	1080	1741	2468	1991
ENSRNOG00000002394	2756	1582	1697	1322	2352	1913	1331	1848	1637	1540	2011	1530	871	1686	2038	1441
ENSRNOG00000002396	1	0	0	0	0	0	0	0	0	0	3	0	0	0	0	1
ENSRNOG00000002397	445	467	293	366	393	275	199	370	362	253	337	424	424	320	239	307
ENSRNOG00000002402	0	0	0	0	0	0	0	0	0	0	0	0	0	0	0	0
ENSRNOG00000002403	112	95	58	126	99	100	74	67	71	73	39	95	17	59	90	66
ENSRNOG00000002407	341	224	274	242	368	195	141	272	241	218	222	376	142	222	173	276
ENSRNOG00000002408	15	9	8	26	28	7	16	11	15	11	23	80	20	9	16	6
ENSRNOG00000002412	0	0	0	0	0	0	0	0	0	0	0	0	0	0	0	0
ENSRNOG00000002413	547	360	206	231	447	303	148	275	302	192	299	389	335	228	409	356
ENSRNOG00000002414	204	257	133	161	287	120	149	183	190	113	151	304	91	136	193	154
ENSRNOG00000002415	12	7	2	12	6	10	2	2	17	5	3	6	13	29	7	24
ENSRNOG00000002417	6	0	3	12	1	15	10	0	0	3	18	2	0	1	20	4
ENSRNOG00000002418	1116	608	401	558	683	749	533	835	563	401	647	707	559	586	756	431
ENSRNOG00000002419	87462	37925	20322	25906	38684	37793	20650	66184	22177	19401	35580	36108	20918	27363	58257	20429
ENSRNOG00000002420	600	307	222	269	294	327	156	387	272	309	399	307	121	199	485	221
ENSRNOG00000002423	405	288	208	245	282	250	186	293	264	242	217	316	270	183	315	195
ENSRNOG00000002425	52	17	10	42	17	17	20	56	19	44	50	28	20	30	60	11
ENSRNOG00000002428	80	19	19	5	14	69	45	84	7	3	59	7	10	14	56	7
ENSRNOG00000002429	0	0	0	0	0	0	0	0	0	0	0	2	0	3	2	3
ENSRNOG00000002433	2983	1764	2036	2582	3455	1732	1459	1967	2529	1667	1514	3245	2333	2002	1895	2459
ENSRNOG00000002434	546	318	169	257	251	389	201	511	229	170	377	296	161	212	464	186
ENSRNOG00000002436	7480	2267	3089	2387	3836	4664	2774	3056	2981	2885	4657	3288	1489	2704	6734	2736
ENSRNOG00000002440	1053	614	637	882	654	986	476	516	699	703	755	887	753	438	954	559
ENSRNOG00000002443	270	165	158	208	231	129	122	124	218	146	143	169	101	120	156	220
ENSRNOG00000002449	1129	592	466	660	714	677	385	803	626	569	616	893	638	428	1040	568
ENSRNOG00000002450	505	200	263	389	318	339	167	255	334	249	357	355	348	283	453	290
ENSRNOG00000002451	1	0	1	0	0	0	0	2	0	0	0	0	0	0	0	0
ENSRNOG00000002452	1030	580	592	652	630	736	372	504	554	687	645	737	617	512	931	448
ENSRNOG00000002453	1512	344	208	134	445	779	418	853	187	224	770	156	145	478	1070	225
ENSRNOG00000002454	847	350	366	364	576	415	288	433	427	270	461	545	226	428	656	437
ENSRNOG00000002456	831	715	1373	1673	1362	782	626	398	1599	1154	763	1335	1641	661	445	1032
ENSRNOG00000002458	353	114	103	58	136	230	125	171	66	89	165	84	9	132	260	80
ENSRNOG00000002459	9	0	5	1	0	7	1	0	1	0	0	0	10	1	4	0
ENSRNOG00000002460	0	0	0	0	0	0	0	0	0	0	0	0	0	0	1	0
ENSRNOG00000002461	273	468	147	377	281	191	123	162	268	143	138	338	255	154	302	274
ENSRNOG00000002462	204	2	15	83	113	40	75	134	124	41	19	8	214	66	78	0
ENSRNOG00000002463	1453	913	954	1518	1051	1058	568	671	1270	833	1002	1446	1992	778	1076	862
ENSRNOG00000002467	13309	6902	6902	8621	8450	8801	4965	6623	7900	7058	7456	9979	5269	6302	12018	6427
ENSRNOG00000002468	2484	1682	2204	2505	4090	1338	1229	1881	2629	1403	1504	2708	1462	1749	1286	2737
ENSRNOG00000002469	118	31	116	94	119	61	38	61	90	72	95	142	123	40	57	81
ENSRNOG00000002470	110	48	28	28	54	31	24	74	32	21	35	49	12	31	103	52
ENSRNOG00000002471	18	7	15	13	3	5	11	15	9	2	22	22	7	10	28	16
ENSRNOG00000002473	311	226	103	150	184	182	146	168	95	134	168	117	53	160	209	148
ENSRNOG00000002474	490	128	179	137	154	260	114	259	136	149	225	171	121	141	455	122
ENSRNOG00000002475	23	18	4	0	1	19	25	9	12	5	20	4	4	13	30	11
ENSRNOG00000002478	1239	513	569	763	673	683	429	590	600	535	662	592	328	560	1045	511
ENSRNOG00000002480	187	98	76	70	103	81	49	150	101	64	86	137	18	64	112	90
ENSRNOG00000002484	0	0	0	0	0	0	0	0	0	0	0	0	0	0	0	0
ENSRNOG00000002486	0	0	0	0	1	0	3	0	0	0	3	0	0	0	0	0
ENSRNOG00000002487	1	6	0	0	0	0	0	0	1	0	2	0	0	0	0	0
ENSRNOG00000002488	212	220	127	227	215	145	111	305	217	147	150	298	162	168	166	171
ENSRNOG00000002491	2	0	0	1	0	0	0	0	0	2	1	0	0	0	0	0
ENSRNOG00000002495	3	0	0	0	0	0	0	0	0	0	1	2	0	1	2	0
ENSRNOG00000002496	796	456	865	761	992	540	529	386	775	418	503	648	639	726	402	669
ENSRNOG00000002497	0	0	0	0	0	0	0	0	0	0	0	0	0	0	0	0
ENSRNOG00000002501	1	2	0	7	3	1	0	0	0	2	2	1	0	0	8	6
ENSRNOG00000002504	33	6	2	5	4	8	7	11	13	9	16	8	0	3	12	8
ENSRNOG00000002505	0	0	0	0	0	0	0	0	0	0	0	2	0	0	0	0
ENSRNOG00000002506	1566	703	908	944	1075	1104	830	958	876	867	1258	1047	490	912	1128	605
ENSRNOG00000002509	1611	1185	1336	1745	2352	914	882	1381	1853	1009	885	2077	741	1158	1067	1834
ENSRNOG00000002511	41	78	77	82	54	73	49	32	95	37	42	45	133	33	36	48
ENSRNOG00000002512	255	196	227	261	244	140	123	188	294	158	126	310	349	146	164	209
ENSRNOG00000002514	494	291	271	261	353	311	214	324	316	222	254	388	256	247	304	242
ENSRNOG00000002515	113	78	64	88	117	59	67	92	44	46	83	76	16	57	79	94
ENSRNOG00000002516	1341	807	877	1341	964	893	572	777	1120	879	713	1329	1010	584	898	961
ENSRNOG00000002517	2	0	1	0	1	1	2	0	0	0	2	0	0	0	2	5
ENSRNOG00000002519	1112	409	220	297	371	804	516	998	270	297	746	357	197	330	807	261
ENSRNOG00000002520	1073	598	353	674	573	529	352	654	502	397	464	754	508	408	842	333
ENSRNOG00000002523	6643	3544	3177	3956	3712	4100	2202	3453	4163	3451	3726	5059	4320	2785	4908	2965
ENSRNOG00000002524	4633	2675	1719	2765	2513	2180	1287	2920	2212	1742	2040	3647	2804	1440	2301	1629
ENSRNOG00000002525	239	98	203	242	291	213	141	79	149	219	252	267	127	123	222	222
ENSRNOG00000002529	1789	426	312	193	426	1274	754	1171	245	306	1052	290	144	544	1317	252
ENSRNOG00000002531	0	0	0	0	0	0	0	0	0	0	0	0	0	0	0	0
ENSRNOG00000002532	0	0	0	0	0	0	0	0	0	0	0	0	0	0	0	0
ENSRNOG00000002535	0	0	0	0	0	0	0	0	0	0	0	0	0	0	0	0
ENSRNOG00000002536	649	225	81	59	159	398	190	347	75	73	311	90	57	196	512	56
ENSRNOG00000002537	306	201	261	236	399	122	217	282	174	155	178	232	95	251	143	258
ENSRNOG00000002538	234	186	92	156	174	96	104	151	142	86	102	184	86	101	92	108
ENSRNOG00000002539	0	0	0	0	0	0	0	0	0	0	0	0	0	0	0	0
ENSRNOG00000002540	25	7	9	3	8	8	8	5	9	2	1	18	0	11	22	1
ENSRNOG00000002541	854	463	487	431	639	650	412	578	367	327	544	461	260	461	558	429
ENSRNOG00000002542	281	127	115	152	225	143	86	170	209	144	186	237	181	128	172	195
ENSRNOG00000002543	90	80	65	55	71	57	20	72	61	47	78	85	44	39	77	37
ENSRNOG00000002544	9396	3896	5560	4387	6500	6822	4363	3869	4702	5186	6254	4152	2677	4582	7794	4304
ENSRNOG00000002545	1782	638	631	637	768	1106	757	846	591	576	1050	644	707	687	1428	654
ENSRNOG00000002546	1062	481	394	365	459	661	401	583	289	385	611	432	283	343	875	315
ENSRNOG00000002548	21	19	27	48	48	20	11	10	28	30	26	29	5	17	44	39
ENSRNOG00000002549	9	0	1	3	3	3	3	14	4	8	6	10	0	11	33	11
ENSRNOG00000002550	3651	976	1318	798	1792	2181	1679	1813	925	918	2182	912	462	1504	2534	1057
ENSRNOG00000002553	2066	970	886	917	1010	1115	572	1121	953	879	941	1271	930	949	1546	697
ENSRNOG00000002555	0	0	2	0	0	0	0	0	0	0	0	0	0	0	0	0
ENSRNOG00000002556	276	213	348	437	432	348	223	427	338	279	226	320	594	252	200	339
ENSRNOG00000002560	18	12	1	43	13	9	8	9	8	2	3	20	20	19	35	17
ENSRNOG00000002563	765	54	65	36	102	453	251	254	53	81	348	85	26	206	688	51
ENSRNOG00000002564	0	0	0	0	0	0	0	0	0	0	0	0	0	0	0	0
ENSRNOG00000002565	1950	919	877	592	1138	1152	820	1299	705	728	1181	660	351	1017	1345	725
ENSRNOG00000002566	5	0	1	19	2	0	1	6	6	11	5	10	8	5	13	10
ENSRNOG00000002568	32	37	20	20	14	16	9	26	20	8	15	23	47	4	31	32
ENSRNOG00000002569	959	335	222	339	307	498	231	423	319	294	439	495	185	241	765	325
ENSRNOG00000002571	41	20	7	5	45	23	3	20	21	47	36	31	30	25	26	20
ENSRNOG00000002572	2789	633	605	749	834	1868	1089	1602	533	712	1759	913	995	880	2499	543
ENSRNOG00000002574	340	186	157	155	145	210	76	138	206	151	175	250	297	150	282	105
ENSRNOG00000002575	755	545	373	655	435	540	267	569	553	514	552	746	737	353	659	394
ENSRNOG00000002578	0	0	0	0	0	0	0	0	0	0	0	0	0	0	0	0
ENSRNOG00000002579	233	234	186	276	318	142	88	186	184	139	151	326	174	131	137	255
ENSRNOG00000002580	606	256	201	232	334	323	175	278	302	238	353	331	244	189	486	217
ENSRNOG00000002582	0	0	0	0	2	0	0	2	0	0	0	0	0	0	0	0
ENSRNOG00000002583	1	6	0	0	0	0	0	0	0	0	0	0	0	0	0	0
ENSRNOG00000002585	1169	252	221	178	422	754	463	785	165	177	706	239	138	387	766	181
ENSRNOG00000002587	105	46	8	41	19	46	20	61	34	53	50	42	11	37	78	29
ENSRNOG00000002588	1105	599	903	1099	1010	734	484	552	1004	792	707	1194	1172	642	773	877
ENSRNOG00000002592	96	73	25	14	74	50	42	115	13	60	66	57	40	87	65	44
ENSRNOG00000002593	442	308	518	602	441	245	325	233	383	262	239	356	309	269	315	342
ENSRNOG00000002595	1608	605	702	269	1025	1099	734	709	277	524	995	237	46	903	1266	475
ENSRNOG00000002597	0	0	0	0	0	0	0	0	0	0	0	0	0	0	0	0
ENSRNOG00000002598	2	0	0	0	0	0	0	13	0	0	0	0	0	0	2	0
ENSRNOG00000002599	33	7	25	39	24	34	9	21	29	32	44	26	45	32	62	33
ENSRNOG00000002602	0	0	0	0	0	0	0	0	0	0	0	0	0	0	0	0
ENSRNOG00000002607	608	542	338	520	495	295	235	590	446	321	379	578	509	291	221	342
ENSRNOG00000002609	212	119	134	104	207	134	74	160	103	160	125	135	91	144	109	156
ENSRNOG00000002610	2111	1288	727	1108	1409	998	579	1424	1090	1039	1028	1660	1288	1025	1260	933
ENSRNOG00000002612	378	164	174	156	255	306	185	226	112	126	275	174	45	175	323	139
ENSRNOG00000002615	854	367	243	400	278	528	224	370	317	442	473	446	350	260	637	245
ENSRNOG00000002616	0	0	0	0	0	1	0	6	0	0	4	3	0	0	4	0
ENSRNOG00000002618	2509	1243	838	844	1152	1443	979	1331	1021	1052	1320	1003	278	1083	1470	849
ENSRNOG00000002624	0	3	0	0	8	5	0	4	0	0	4	2	0	0	0	0
ENSRNOG00000002625	1199	550	736	823	911	754	823	782	661	324	717	591	447	587	727	683
ENSRNOG00000002626	1303	637	1361	1559	1269	1156	721	375	1104	1147	1001	1274	569	526	1688	959
ENSRNOG00000002627	2369	1343	1509	1881	1885	1600	966	1299	1838	1527	1647	2007	2225	1146	1950	1384
ENSRNOG00000002628	0	0	0	0	0	0	0	0	0	0	0	0	0	0	0	0
ENSRNOG00000002630	2273	885	724	995	986	1100	509	941	912	922	863	1247	548	718	1651	701
ENSRNOG00000002632	5696	3396	1915	3070	2565	3845	2014	3237	2651	2473	3285	3645	2089	2342	4959	2216
ENSRNOG00000002635	1037	550	557	919	686	756	407	460	638	722	613	871	1131	392	919	527
ENSRNOG00000002636	5243	4087	2725	4552	3642	3245	2801	4968	4374	2449	2964	4898	3660	3187	2722	3302
ENSRNOG00000002640	0	0	0	0	0	0	0	0	0	0	0	0	0	1	0	0
ENSRNOG00000002641	0	0	0	0	0	0	0	0	0	0	0	0	0	0	0	0
ENSRNOG00000002642	3766	720	604	1051	818	2180	1258	2065	783	480	1998	1083	1436	1045	3146	557
ENSRNOG00000002643	684	393	258	282	295	393	243	379	300	331	336	372	156	247	544	276
ENSRNOG00000002644	781	273	286	360	335	487	312	330	313	212	462	302	317	370	642	240
ENSRNOG00000002645	505	357	362	420	569	305	225	318	443	282	339	520	416	292	326	383
ENSRNOG00000002652	7844	4977	6882	7337	7476	5665	3470	4345	7370	6396	6046	7921	5185	4478	6749	5678
ENSRNOG00000002653	2475	937	1168	1336	1204	2089	1075	1071	1841	1445	1635	1424	1745	1339	1403	946
ENSRNOG00000002654	1615	780	746	641	1002	1068	746	1459	706	574	974	752	335	799	1022	729
ENSRNOG00000002657	74	66	48	44	51	66	55	80	45	37	64	56	9	32	85	31
ENSRNOG00000002659	14	6	3	2	6	4	2	1	6	15	14	16	18	6	6	10
ENSRNOG00000002660	2913	1765	1916	2376	2704	1810	1100	1902	2401	1627	1481	2718	2408	1501	2195	1853
ENSRNOG00000002661	0	0	0	0	1	0	0	0	0	0	0	0	1	0	0	0
ENSRNOG00000002662	450	148	157	120	210	272	122	224	114	147	222	113	45	234	390	139
ENSRNOG00000002664	140	108	51	117	110	65	44	72	88	49	98	89	66	60	101	50
ENSRNOG00000002667	265	96	201	159	362	182	93	79	163	178	157	174	164	170	131	154
ENSRNOG00000002669	3192	2351	2327	3160	3100	2158	1211	2109	3321	2362	2239	3164	3109	2035	2069	2218
ENSRNOG00000002671	4910	2227	1600	2813	2044	2843	1419	2164	2569	2019	2289	3521	2712	1846	4338	1976
ENSRNOG00000002680	1292	1036	838	1309	1008	709	475	779	1097	860	712	1213	1196	677	888	823
ENSRNOG00000002682	674	233	137	132	80	179	43	199	140	293	221	193	233	112	292	74
ENSRNOG00000002691	2	0	1	0	0	2	3	0	2	0	2	11	0	3	4	6
ENSRNOG00000002693	3071	1535	1452	2067	1539	1988	1128	1297	1792	1669	1837	2312	1805	1268	2760	1580
ENSRNOG00000002695	424	76	45	55	62	286	72	158	25	42	204	61	26	99	399	47
ENSRNOG00000002697	1561	1411	1640	2007	1915	1662	1017	1004	2014	2143	1836	2133	2362	1093	1222	1607
ENSRNOG00000002699	0	0	0	0	0	0	0	0	0	0	0	0	0	0	0	0
ENSRNOG00000002701	8	0	2	0	3	4	2	3	3	0	5	9	7	2	11	2
ENSRNOG00000002705	1395	636	587	632	885	738	530	876	501	543	719	674	512	537	1048	492
ENSRNOG00000002708	678	440	300	380	521	323	234	405	350	275	365	497	218	273	455	360
ENSRNOG00000002710	600	292	422	566	511	388	243	311	543	313	340	594	689	385	387	475
ENSRNOG00000002711	39	22	16	8	11	16	6	24	10	12	33	20	0	14	29	18
ENSRNOG00000002712	0	0	0	0	0	0	3	0	0	0	0	0	0	0	0	0
ENSRNOG00000002713	492	275	230	231	293	352	190	242	283	259	296	324	220	259	373	236
ENSRNOG00000002714	563	167	212	282	268	262	179	221	222	249	208	302	402	175	518	239
ENSRNOG00000002718	0	0	2	0	0	0	0	0	0	6	2	0	0	0	2	0
ENSRNOG00000002721	3149	1666	1068	1891	1274	1879	939	1363	1543	1154	1527	2434	2455	1128	2758	1182
ENSRNOG00000002722	6448	3882	3896	5434	4247	4350	2587	2865	5071	3680	3819	5741	6141	3424	5242	3315
ENSRNOG00000002723	7	4	4	0	3	6	3	13	1	3	2	2	0	5	9	0
ENSRNOG00000002724	1547	544	443	507	646	755	436	761	440	550	624	670	268	500	1154	481
ENSRNOG00000002726	0	0	0	0	0	0	0	0	0	0	0	0	0	0	0	0
ENSRNOG00000002728	17	0	0	7	5	1	6	5	1	3	2	0	0	9	4	5
ENSRNOG00000002730	432	352	456	675	509	275	208	359	655	557	332	501	495	361	377	302
ENSRNOG00000002731	176	51	31	57	81	59	40	32	66	53	42	53	52	73	20	39
ENSRNOG00000002733	0	0	0	0	0	0	0	0	0	0	0	0	0	0	0	0
ENSRNOG00000002734	422	212	256	156	307	225	194	187	171	174	269	193	61	336	309	187
ENSRNOG00000002735	2813	976	1037	1173	1622	1133	839	1348	1020	788	1169	905	294	1270	1899	1001
ENSRNOG00000002736	591	272	401	414	703	339	298	286	379	194	327	449	140	401	336	468
ENSRNOG00000002737	1460	848	1098	1611	1182	1302	656	861	1406	1252	1127	1493	1503	852	1347	1146
ENSRNOG00000002746	433	307	183	389	332	270	177	320	393	247	257	452	331	242	263	256
ENSRNOG00000002748	539	135	171	190	203	393	261	358	208	170	409	173	144	205	422	123
ENSRNOG00000002749	11985	6237	6162	6260	7656	7654	5496	7949	6195	4900	7557	6343	2680	5330	7606	5268
ENSRNOG00000002750	355	409	473	576	566	153	271	323	459	247	222	573	329	248	164	544
ENSRNOG00000002751	122	81	132	80	101	99	57	76	67	75	104	59	54	80	109	86
ENSRNOG00000002753	3847	1971	2289	2682	2306	2162	1148	1465	2461	2486	2731	2798	3495	1406	1983	1767
ENSRNOG00000002754	2	9	0	0	0	2	0	0	0	0	0	0	0	0	1	0
ENSRNOG00000002755	16296	6039	7571	6220	10404	11233	8527	10485	6306	5902	11132	6047	4189	8334	12192	5902
ENSRNOG00000002757	531	267	184	240	271	238	99	250	194	260	300	241	187	193	340	170
ENSRNOG00000002759	786	302	331	420	342	570	259	438	339	329	484	477	213	380	718	249
ENSRNOG00000002760	0	0	0	0	0	0	0	0	0	0	0	0	0	0	0	0
ENSRNOG00000002763	2372	1556	1765	2067	1997	1450	1055	1508	1996	1499	1492	2098	1662	1393	1568	1404
ENSRNOG00000002764	457	261	179	194	311	285	160	330	168	222	312	195	76	228	359	217
ENSRNOG00000002767	6116	3058	4243	4683	5008	4150	2508	2365	5222	3960	3752	5434	4792	3893	4809	4415
ENSRNOG00000002768	92	72	66	88	56	83	93	30	98	101	76	85	114	25	111	70
ENSRNOG00000002771	0	0	0	0	0	0	0	0	0	0	0	0	0	0	0	0
ENSRNOG00000002773	9842	3862	5777	5121	5872	7112	4404	2344	5151	5322	5968	4524	1944	3279	9763	4285
ENSRNOG00000002775	294	94	80	61	51	130	52	161	65	62	118	108	39	100	166	63
ENSRNOG00000002776	0	0	2	0	0	0	0	2	3	0	1	0	5	0	0	0
ENSRNOG00000002778	325	169	154	134	212	224	106	124	201	160	168	207	73	131	283	205
ENSRNOG00000002781	579	218	245	345	295	277	160	307	338	162	247	411	364	193	322	259
ENSRNOG00000002782	7	0	3	1	3	5	3	3	8	5	5	5	0	8	0	3
ENSRNOG00000002783	83	54	35	28	39	40	24	53	39	54	58	32	4	50	40	30
ENSRNOG00000002784	261	160	134	172	206	84	76	128	191	87	91	243	224	126	95	109
ENSRNOG00000002789	0	11	5	11	14	0	2	0	8	7	6	13	0	5	2	12
ENSRNOG00000002790	441	242	248	187	340	227	258	319	200	211	252	174	160	228	245	209
ENSRNOG00000002791	90	95	77	86	99	79	44	99	86	85	86	112	78	84	65	62
ENSRNOG00000002792	0	0	0	0	0	0	0	0	0	0	0	0	0	0	1	0
ENSRNOG00000002793	305	107	242	289	796	231	187	149	380	158	149	347	369	202	258	208
ENSRNOG00000002794	4	8	1	6	2	2	4	0	1	2	2	3	0	0	8	3
ENSRNOG00000002795	996	596	525	706	655	541	306	493	791	476	518	826	840	433	664	513
ENSRNOG00000002797	12	34	17	6	10	14	9	24	19	6	20	40	19	6	25	1
ENSRNOG00000002800	115	75	27	34	28	74	47	223	34	59	54	88	36	33	80	58
ENSRNOG00000002802	1	0	0	0	0	0	0	0	1	0	0	0	0	0	0	0
ENSRNOG00000002803	922	455	294	258	397	612	434	587	223	233	578	266	129	523	667	228
ENSRNOG00000002807	1713	1154	1151	1606	2068	1310	695	1067	1765	1219	1257	1940	1540	1084	1559	1192
ENSRNOG00000002810	151	87	67	80	84	71	29	45	62	33	79	74	64	69	136	103
ENSRNOG00000002811	773	414	260	371	358	401	283	415	413	202	312	346	255	501	705	302
ENSRNOG00000002812	1	0	0	0	0	0	0	42	0	1	0	2	0	6	3	0
ENSRNOG00000002813	442	249	181	178	221	282	182	248	198	154	226	209	79	203	345	226
ENSRNOG00000002814	82	60	23	78	56	51	33	48	64	47	51	79	127	22	95	61
ENSRNOG00000002815	10	10	6	12	5	4	7	80	5	0	9	323	8	4	22	27
ENSRNOG00000002818	3259	1627	1834	2278	2310	2105	1187	1355	2324	2056	1889	2568	2123	1668	2437	1775
ENSRNOG00000002820	2	0	0	0	0	0	0	0	1	6	2	1	0	0	3	4
ENSRNOG00000002821	4712	3391	2647	3814	3535	2956	2008	3058	3625	2370	2785	4361	3478	2247	2679	2683
ENSRNOG00000002823	4647	2144	2768	2792	2898	2916	1999	2190	2624	2154	2682	2704	2309	2206	3283	2109
ENSRNOG00000002824	6	3	6	4	4	1	3	3	2	2	2	5	2	2	1	7
ENSRNOG00000002826	88	50	42	77	64	45	20	52	69	58	33	67	61	32	49	35
ENSRNOG00000002827	11462	4010	5758	6852	5403	8028	4243	3352	6255	5324	6693	6245	5463	4876	8313	4669
ENSRNOG00000002828	857	338	280	384	383	483	281	457	299	302	482	577	407	214	579	240
ENSRNOG00000002829	0	0	0	0	0	0	0	0	0	0	0	0	0	0	0	0
ENSRNOG00000002831	121	137	59	87	111	79	36	114	113	47	62	250	85	66	125	100
ENSRNOG00000002832	376	292	220	296	321	199	117	189	335	186	196	690	294	216	229	291
ENSRNOG00000002833	1265	920	1246	1375	1629	854	714	865	1493	879	697	1527	1159	910	761	1222
ENSRNOG00000002834	1	0	0	0	3	0	0	0	0	0	0	0	0	0	0	0
ENSRNOG00000002835	2936	897	744	674	894	1442	902	1432	467	977	1831	734	422	822	1897	601
ENSRNOG00000002838	591	214	215	254	222	293	127	196	194	183	259	200	42	193	549	201
ENSRNOG00000002839	451	167	142	149	169	195	99	197	144	164	189	136	72	95	306	95
ENSRNOG00000002840	40872	20795	18448	28095	23421	24127	15122	16484	24215	18322	19479	29563	20696	17569	34873	19855
ENSRNOG00000002841	4298	2803	3069	2732	3604	3209	2394	3701	2404	2444	3526	2853	1603	2503	2613	2189
ENSRNOG00000002843	2	0	0	0	1	0	0	0	1	0	0	1	0	0	3	0
ENSRNOG00000002844	436	222	222	219	401	245	178	334	242	311	345	396	137	299	344	312
ENSRNOG00000002845	0	0	0	0	0	0	0	0	0	0	0	0	0	0	0	0
ENSRNOG00000002848	1409	748	652	835	992	887	596	1045	797	719	1002	836	117	774	1030	692
ENSRNOG00000002851	913	476	424	530	533	535	254	458	506	429	547	632	558	353	762	388
ENSRNOG00000002852	305	191	176	148	131	161	82	122	135	259	163	242	126	125	139	123
ENSRNOG00000002855	1756	956	1256	1116	1698	1386	847	1356	1248	1263	1548	1171	753	1023	1330	1130
ENSRNOG00000002858	0	0	0	0	0	0	0	0	0	0	0	0	0	0	0	0
ENSRNOG00000002860	1712	934	886	843	862	1280	828	1135	956	928	1259	1084	539	818	1236	717
ENSRNOG00000002862	50	42	45	44	84	17	28	139	66	28	26	71	23	33	24	63
ENSRNOG00000002863	2114	1931	3000	2654	4933	1380	1464	1217	4440	1384	1357	3794	3460	2862	968	4214
ENSRNOG00000002864	2598	2077	2129	2814	2377	2082	1426	1946	2754	2042	2066	2902	3114	1742	1786	2102
ENSRNOG00000002866	26	13	7	29	8	22	7	13	4	26	12	11	0	7	25	7
ENSRNOG00000002871	341	137	172	149	248	255	144	163	175	140	253	221	129	181	219	180
ENSRNOG00000002873	54	15	8	0	13	14	3	57	1	14	4	18	0	27	7	7
ENSRNOG00000002874	1198	297	271	209	310	591	276	544	212	214	581	238	151	317	784	219
ENSRNOG00000002875	741	275	269	304	358	325	200	286	316	245	367	354	259	258	453	361
ENSRNOG00000002876	45	40	11	30	26	51	12	15	22	21	21	34	32	24	22	27
ENSRNOG00000002877	7893	5233	6423	5817	8537	4772	3602	5610	6743	4760	5128	6252	3185	5652	5218	6196
ENSRNOG00000002878	8	0	1	3	1	0	5	3	3	2	6	4	0	7	1	3
ENSRNOG00000002879	522	270	226	324	326	276	121	311	328	283	280	410	522	190	381	249
ENSRNOG00000002881	168	227	90	173	158	98	87	88	113	63	155	155	66	67	227	120
ENSRNOG00000002882	475	372	362	446	384	299	205	351	401	307	326	473	361	223	311	308
ENSRNOG00000002883	301	181	99	178	190	196	73	155	170	191	171	262	303	107	185	105
ENSRNOG00000002884	408	201	184	181	287	273	196	168	200	255	289	210	69	221	319	168
ENSRNOG00000002886	12816	8783	12515	12758	14999	10825	7090	7126	14987	10814	10198	13998	13642	9431	9150	11230
ENSRNOG00000002889	7	4	6	6	3	3	4	15	2	11	5	4	0	9	8	5
ENSRNOG00000002890	465	224	297	357	301	271	202	155	375	273	195	373	184	252	269	321
ENSRNOG00000002894	1539	871	854	1092	1046	880	591	809	985	962	955	1427	1324	862	1080	843
ENSRNOG00000002895	325	121	96	175	94	194	71	134	136	184	128	191	188	97	215	115
ENSRNOG00000002896	4501	3081	1933	3134	2232	3318	2132	3352	2581	2358	2712	3393	1964	1974	3703	1907
ENSRNOG00000002898	331	113	125	160	182	194	93	198	156	145	145	182	84	155	284	107
ENSRNOG00000002899	593	345	381	381	438	329	280	270	311	287	292	372	325	318	379	332
ENSRNOG00000002903	1077	820	751	814	900	767	502	895	851	649	804	984	429	705	748	675
ENSRNOG00000002904	36	44	17	14	7	13	3	15	13	24	25	3	7	17	2	14
ENSRNOG00000002905	19	18	8	4	6	6	3	9	4	19	11	20	9	10	9	0
ENSRNOG00000002906	5	2	3	0	0	0	0	3	0	4	2	2	16	4	0	0
ENSRNOG00000002907	3295	1847	1957	1932	1638	2109	986	1638	2076	2097	1869	2173	2340	1408	1990	1278
ENSRNOG00000002908	2074	1211	1130	1563	1218	1545	651	1103	1470	1337	1312	1715	1390	968	1682	889
ENSRNOG00000002909	0	0	0	0	0	0	0	0	0	0	0	0	0	0	0	0
ENSRNOG00000002911	274	245	133	181	130	216	155	196	174	159	252	257	83	85	328	146
ENSRNOG00000002912	305	225	176	188	199	182	88	160	199	172	181	199	127	140	240	172
ENSRNOG00000002914	1237	607	457	658	678	641	322	602	648	693	698	828	833	445	922	504
ENSRNOG00000002915	448	220	195	304	199	252	107	220	230	293	226	339	295	140	336	212
ENSRNOG00000002916	438	203	239	365	171	347	143	106	237	201	250	330	238	126	465	105
ENSRNOG00000002917	168	217	150	178	144	112	54	162	142	139	109	182	257	108	110	110
ENSRNOG00000002918	2	0	2	1	0	7	0	7	2	6	3	1	0	0	4	0
ENSRNOG00000002919	22247	22688	10383	19049	15692	17595	11308	23404	15208	13508	18189	23705	15661	12193	26066	15356
ENSRNOG00000002921	0	0	0	0	0	0	0	0	0	0	0	0	0	0	0	0
ENSRNOG00000002922	309	199	99	130	133	111	92	231	123	144	188	227	123	97	209	96
ENSRNOG00000002923	0	0	0	0	0	0	0	0	0	0	0	0	0	0	0	0
ENSRNOG00000002925	3	0	0	0	0	0	0	1	0	0	0	0	0	0	2	1
ENSRNOG00000002926	795	434	458	518	692	597	269	507	486	505	527	608	384	379	692	554
ENSRNOG00000002928	6947	2855	2333	3494	2326	3892	1804	2439	3200	2758	3146	4096	3521	2164	7298	2052
ENSRNOG00000002930	115	65	108	109	101	73	43	63	109	116	76	106	58	54	68	79
ENSRNOG00000002932	756	305	479	369	524	299	238	375	462	365	344	570	344	322	445	388
ENSRNOG00000002934	40987	12982	17230	23325	20214	21979	12276	13485	18352	15111	18299	23566	18268	14711	33840	15690
ENSRNOG00000002935	6256	4487	3524	4787	3608	5010	3332	5130	4034	3449	4758	4892	3685	3183	4561	2883
ENSRNOG00000002936	1	2	0	0	0	1	0	0	0	0	1	4	0	1	2	0
ENSRNOG00000002937	35	9	6	14	13	11	4	22	1	13	16	12	14	10	24	10
ENSRNOG00000002940	3891	2382	2674	2808	4049	2410	1845	2269	3020	1834	2175	3031	1501	2170	2747	2826
ENSRNOG00000002941	2257	1390	1573	1544	2598	1308	1167	1761	1761	1048	1346	2002	1012	1590	1085	1469
ENSRNOG00000002943	615	312	246	408	304	362	145	277	371	317	275	509	405	253	510	238
ENSRNOG00000002944	531	231	230	296	232	364	149	309	278	274	302	402	404	205	394	210
ENSRNOG00000002946	10	8	3	9	7	16	8	34	6	24	29	26	42	11	13	9
ENSRNOG00000002947	36	6	31	32	27	38	32	10	34	25	35	36	24	7	171	42
ENSRNOG00000002948	66	72	39	29	27	43	15	20	33	61	45	52	29	18	55	27
ENSRNOG00000002949	1598	838	1032	1226	1067	1162	526	661	1138	1141	1117	1353	1224	761	1457	820
ENSRNOG00000002950	114	64	25	64	33	67	29	77	59	28	64	77	80	51	119	54
ENSRNOG00000002951	0	0	1	0	0	0	0	0	0	0	0	0	0	1	0	0
ENSRNOG00000002953	8	6	7	10	12	0	1	15	11	29	3	9	5	2	4	6
ENSRNOG00000002956	1860	749	860	902	1180	1365	635	878	1037	879	1205	1114	1331	922	1325	753
ENSRNOG00000002959	82	87	96	127	106	61	43	52	103	91	63	101	92	68	61	67
ENSRNOG00000002960	6	3	54	2	4	3	6	7	2	2	4	75	1	2	7	1
ENSRNOG00000002963	973	544	267	553	423	389	263	700	440	298	562	937	553	353	956	445
ENSRNOG00000002964	0	0	0	0	0	0	0	0	0	0	0	0	0	0	0	0
ENSRNOG00000002968	26	17	0	0	0	16	11	8	1	4	15	2	0	4	14	4
ENSRNOG00000002969	878	758	614	867	731	616	469	1090	825	626	623	1089	1027	590	610	722
ENSRNOG00000002970	84	62	32	64	50	31	19	31	34	37	28	55	4	23	63	14
ENSRNOG00000002972	44	9	27	7	23	22	11	10	12	31	13	27	6	12	9	15
ENSRNOG00000002974	0	0	0	0	0	0	0	0	0	0	0	0	0	0	0	0
ENSRNOG00000002975	3	0	2	0	0	0	0	1	1	2	0	3	2	2	1	4
ENSRNOG00000002976	154	71	75	31	92	66	19	89	51	74	82	73	63	49	67	31
ENSRNOG00000002977	1922	937	1213	1246	1454	1304	752	874	1178	979	1183	1400	1241	1161	1327	1028
ENSRNOG00000002978	0	5	2	5	0	2	0	1	1	0	3	3	6	1	5	3
ENSRNOG00000002979	24	16	2	4	5	2	0	10	8	10	11	8	5	6	3	3
ENSRNOG00000002980	962	335	463	468	592	480	273	479	448	450	535	449	210	435	772	343
ENSRNOG00000002981	2707	1608	2588	2669	2028	2163	980	1231	2279	2409	1732	2350	2676	1230	2129	1771
ENSRNOG00000002983	1773	1773	2142	2898	2354	1588	1130	1270	1865	1835	1596	2738	2040	1009	1323	1621
ENSRNOG00000002984	16	22	2	16	5	11	8	4	10	7	17	13	4	5	20	18
ENSRNOG00000002985	1807	1279	2425	2501	2736	1537	945	564	2051	1977	1426	1981	2155	1085	1326	1675
ENSRNOG00000002986	38	6	5	6	12	8	13	43	8	16	22	2	1	16	25	6
ENSRNOG00000002989	2729	1561	1743	2550	2516	1961	1210	1491	2171	2025	1896	2594	2039	1599	2276	1967
ENSRNOG00000002991	304	250	221	219	285	216	127	182	227	199	210	208	126	197	237	235
ENSRNOG00000002993	1413	759	560	496	698	665	305	763	562	676	830	707	641	517	718	537
ENSRNOG00000002994	54	17	15	16	29	14	16	27	18	20	25	33	0	20	42	28
ENSRNOG00000002997	1279	632	667	1027	850	1000	374	726	857	942	857	1223	1519	610	1174	669
ENSRNOG00000002999	884	568	496	695	470	682	284	630	633	506	603	830	616	444	882	411
ENSRNOG00000003003	481	149	176	220	261	261	173	235	204	168	222	275	235	233	378	139
ENSRNOG00000003005	874	427	419	540	410	496	213	265	520	479	479	615	703	339	1091	427
ENSRNOG00000003008	0	0	0	0	0	0	0	0	0	0	0	0	0	0	0	0
ENSRNOG00000003009	0	0	0	0	0	0	0	0	0	0	0	0	0	0	0	0
ENSRNOG00000003011	1493	706	555	944	843	1000	430	888	863	744	962	1166	1409	631	1308	705
ENSRNOG00000003013	290	86	49	105	95	160	85	162	74	63	126	90	43	81	182	60
ENSRNOG00000003014	845	414	248	323	309	372	238	476	238	343	346	276	155	289	520	241
ENSRNOG00000003018	225	186	95	142	229	89	51	125	112	123	94	251	134	68	122	89
ENSRNOG00000003019	1586	961	1140	1378	1568	1189	727	897	1357	1188	1150	1674	1339	907	1383	1035
ENSRNOG00000003020	9	0	3	1	0	0	3	0	0	0	1	2	0	5	4	0
ENSRNOG00000003021	0	0	0	0	0	0	0	0	0	0	0	0	0	0	0	0
ENSRNOG00000003025	1584	517	596	453	799	946	592	699	483	480	784	586	636	646	1161	485
ENSRNOG00000003026	1438	773	761	1013	937	981	508	797	909	717	727	1233	1307	611	1192	609
ENSRNOG00000003027	0	0	0	0	0	0	0	0	0	0	0	0	0	0	0	0
ENSRNOG00000003028	342	166	174	264	183	175	74	199	280	213	234	215	269	140	315	189
ENSRNOG00000003029	12796	7669	7204	9526	10138	9633	5343	7731	9237	7680	8931	10864	8067	6514	10086	8263
ENSRNOG00000003030	5	8	3	2	8	1	0	6	9	5	2	0	0	3	1	2
ENSRNOG00000003031	3146	2227	3666	2994	7370	1861	1761	1527	4614	2593	2004	5260	2708	3053	1664	4736
ENSRNOG00000003033	478	305	359	534	349	363	200	254	334	462	379	461	278	172	399	209
ENSRNOG00000003035	0	0	0	0	3	0	0	0	0	0	0	0	0	0	0	0
ENSRNOG00000003038	271	258	91	185	163	178	115	248	153	135	159	274	79	112	254	160
ENSRNOG00000003039	0	0	0	0	0	0	0	0	0	0	0	0	0	0	0	0
ENSRNOG00000003041	93	13	44	37	60	34	33	27	35	48	38	58	10	39	60	30
ENSRNOG00000003042	763	518	544	666	697	535	309	377	698	608	573	752	799	418	568	521
ENSRNOG00000003048	1019	342	263	277	412	602	311	479	358	289	449	480	258	379	786	303
ENSRNOG00000003049	1096	576	402	707	485	662	343	524	637	457	495	818	504	392	940	411
ENSRNOG00000003050	5492	4048	3031	4054	3907	4050	2335	3879	4078	3780	4036	4474	3771	2886	4719	3036
ENSRNOG00000003052	315	99	95	151	113	183	40	105	173	100	117	171	151	103	189	110
ENSRNOG00000003054	125	4	2	69	154	13	57	33	205	2	12	6	0	2	133	76
ENSRNOG00000003059	27	28	10	25	23	17	10	29	21	29	20	9	19	27	16	7
ENSRNOG00000003062	97	77	46	105	59	80	47	61	56	56	47	83	62	47	103	22
ENSRNOG00000003063	1171	814	646	831	869	805	646	863	717	515	745	712	381	591	740	631
ENSRNOG00000003064	27	8	11	15	7	14	5	4	23	19	7	8	5	5	29	15
ENSRNOG00000003065	6500	3365	3526	4683	4480	4021	2416	3408	4077	3603	4128	4686	3134	2841	5536	3430
ENSRNOG00000003066	717	469	615	945	452	613	357	323	646	521	543	791	860	379	728	389
ENSRNOG00000003067	0	0	1	0	0	0	0	0	0	0	0	0	0	0	0	0
ENSRNOG00000003068	163	106	83	109	87	102	37	116	64	72	111	138	90	77	157	97
ENSRNOG00000003069	427	230	132	168	126	228	155	613	136	120	253	180	58	122	307	121
ENSRNOG00000003070	155	79	75	88	114	74	39	113	103	71	119	93	102	57	156	48
ENSRNOG00000003071	2249	740	754	693	805	1430	757	1199	621	757	1251	769	522	790	1696	476
ENSRNOG00000003073	115	136	63	71	166	72	37	78	123	70	79	144	112	127	57	95
ENSRNOG00000003075	153	45	52	84	26	72	36	74	59	121	75	90	62	31	99	38
ENSRNOG00000003076	513	438	285	397	323	379	258	423	367	340	319	434	370	265	422	304
ENSRNOG00000003078	2873	1316	1738	1635	2120	2112	1177	1239	1711	1788	2151	2078	1464	1535	2442	1352
ENSRNOG00000003080	0	0	0	0	0	0	0	1	0	0	0	1	0	0	2	0
ENSRNOG00000003081	174	140	90	92	125	83	73	149	102	84	95	117	57	72	99	80
ENSRNOG00000003084	1944	1252	1120	1593	1631	1332	841	1038	1414	1157	1123	1879	1532	1033	1712	1166
ENSRNOG00000003085	1	0	0	2	0	0	0	4	0	0	0	0	0	0	0	0
ENSRNOG00000003086	472	221	138	192	159	224	81	234	173	218	178	311	335	113	364	145
ENSRNOG00000003088	484	528	411	506	543	390	219	523	583	299	388	715	475	302	409	492
ENSRNOG00000003089	0	0	0	0	0	0	0	0	0	0	0	0	0	0	0	0
ENSRNOG00000003094	1	0	0	0	0	3	0	0	0	0	0	0	0	0	0	0
ENSRNOG00000003095	0	0	0	4	1	1	0	1	0	0	0	0	0	0	2	4
ENSRNOG00000003096	25	33	12	36	22	14	9	9	23	31	12	26	26	14	21	16
ENSRNOG00000003098	352	259	223	223	229	174	114	220	248	251	246	211	134	161	367	119
ENSRNOG00000003099	6348	2582	2419	3424	4097	3434	2262	3390	4109	2432	3208	4601	4853	2732	4187	3268
ENSRNOG00000003100	201	154	112	101	184	155	98	176	151	186	171	177	91	127	161	143
ENSRNOG00000003103	218	137	105	129	153	97	45	93	151	101	96	184	148	70	128	102
ENSRNOG00000003104	477	249	271	286	453	247	137	278	347	216	286	467	358	230	291	299
ENSRNOG00000003105	237	212	104	160	110	160	76	198	114	175	134	229	126	102	161	125
ENSRNOG00000003108	2033	1155	946	1393	990	1502	610	1005	1413	1375	1267	1527	1622	787	1692	845
ENSRNOG00000003109	1164	657	570	1075	421	871	578	636	829	560	629	876	939	365	761	531
ENSRNOG00000003110	0	0	0	0	0	0	0	0	0	0	0	0	0	0	0	0
ENSRNOG00000003111	425	121	118	140	137	148	55	93	147	170	151	252	200	127	276	118
ENSRNOG00000003112	0	0	0	0	0	0	0	0	0	0	0	2	0	0	0	0
ENSRNOG00000003114	418	217	164	239	196	265	144	204	216	193	229	293	178	213	308	128
ENSRNOG00000003115	0	0	0	0	0	0	0	0	0	0	0	0	0	0	0	0
ENSRNOG00000003116	359	129	104	162	111	167	59	112	179	167	132	191	211	145	168	115
ENSRNOG00000003117	2227	1362	1308	1439	1619	1688	1088	1700	1286	1404	1718	1518	1140	1184	2003	1202
ENSRNOG00000003119	0	0	0	0	0	0	0	0	0	0	0	0	0	0	0	0
ENSRNOG00000003120	1542	1174	646	1133	1052	858	608	1036	1154	901	730	1235	913	737	1191	707
ENSRNOG00000003121	3167	1494	2281	2915	2229	2851	1364	1030	2638	2338	2683	2981	2884	1589	2346	1792
ENSRNOG00000003122	260	98	67	119	114	143	45	171	102	87	128	138	70	106	180	81
ENSRNOG00000003123	1106	745	704	782	750	754	538	753	823	603	669	962	560	601	753	555
ENSRNOG00000003125	4178	1606	1464	2060	1746	2112	879	1591	2048	1961	1766	2746	2648	1441	3069	1390
ENSRNOG00000003127	301	160	117	128	134	158	55	144	87	152	141	152	108	140	308	113
ENSRNOG00000003129	246	218	138	224	197	226	99	209	183	187	219	285	311	134	224	180
ENSRNOG00000003131	1376	771	483	906	458	741	364	521	589	602	627	832	786	440	943	441
ENSRNOG00000003132	2	0	0	0	0	0	0	0	0	0	0	3	0	0	4	0
ENSRNOG00000003133	0	0	0	0	0	0	0	0	0	0	0	0	0	0	0	0
ENSRNOG00000003134	2816	2333	1722	2980	2107	1571	1344	3438	2309	1188	1503	2715	1338	1742	1605	2117
ENSRNOG00000003135	3	3	8	2	1	2	7	3	5	0	3	0	12	5	4	0
ENSRNOG00000003136	40	19	3	22	15	5	7	8	15	0	7	18	4	3	11	10
ENSRNOG00000003137	1	7	2	0	0	0	0	0	0	0	0	2	0	0	1	0
ENSRNOG00000003138	2	35	23	0	1	20	4	1	17	7	14	5	12	13	47	0
ENSRNOG00000003139	2994	1513	1986	1922	2623	1863	1247	1539	2000	1590	1801	1957	747	1574	2296	1902
ENSRNOG00000003143	11	3	4	6	3	9	2	12	1	6	5	2	0	7	13	4
ENSRNOG00000003144	81	97	53	75	64	43	31	64	46	56	39	87	57	49	76	35
ENSRNOG00000003146	792	195	165	242	262	432	276	418	210	313	415	248	62	247	659	146
ENSRNOG00000003147	17994	8285	8243	12411	10848	9551	5283	8739	11812	8777	8459	14301	16370	7410	14523	8641
ENSRNOG00000003148	7125	4704	3958	5259	6479	4460	2417	5027	5246	3779	4070	7667	6130	4057	5023	4565
ENSRNOG00000003149	800	352	268	542	461	411	201	329	413	389	393	622	658	302	603	350
ENSRNOG00000003150	2967	1150	850	1522	1095	1941	763	1301	1079	1215	1609	1564	1690	913	2584	931
ENSRNOG00000003151	1054	465	611	612	652	659	430	546	616	602	709	614	296	536	788	538
ENSRNOG00000003153	61	16	28	29	44	56	13	13	15	19	51	19	9	13	32	36
ENSRNOG00000003158	4	0	1	1	1	7	4	4	3	0	0	8	6	1	4	3
ENSRNOG00000003160	124	15	11	11	23	45	28	85	23	7	54	24	8	21	96	35
ENSRNOG00000003163	4471	1821	1358	2347	1812	2403	1165	2121	1982	1663	1980	3021	1526	1533	3795	1502
ENSRNOG00000003164	1	0	0	0	0	0	0	0	0	0	0	0	0	0	0	0
ENSRNOG00000003170	152	51	37	57	65	90	39	111	62	32	88	99	50	54	127	66
ENSRNOG00000003171	60	21	6	7	7	18	16	12	13	6	18	16	9	16	15	4
ENSRNOG00000003172	306	308	105	299	137	197	92	52	157	125	191	255	97	60	402	178
ENSRNOG00000003173	0	0	0	0	0	0	0	0	0	0	0	0	0	0	0	0
ENSRNOG00000003174	582	201	192	203	229	303	192	337	138	217	386	245	96	241	426	179
ENSRNOG00000003176	0	0	0	0	0	0	0	0	0	0	0	0	0	0	0	0
ENSRNOG00000003177	4542	1340	1834	2694	1951	2632	1609	1178	2005	1457	2089	2403	2178	1327	3691	1367
ENSRNOG00000003178	1072	445	323	440	463	601	311	692	379	365	587	704	478	298	834	321
ENSRNOG00000003182	0	0	0	6	0	0	0	0	0	0	0	0	0	0	0	0
ENSRNOG00000003183	506	1090	177	741	370	555	363	157	411	272	332	392	569	296	702	360
ENSRNOG00000003185	703	326	347	510	514	341	206	358	310	332	309	639	354	356	558	367
ENSRNOG00000003186	1441	877	624	932	913	1024	544	828	820	974	1115	1162	802	681	1416	850
ENSRNOG00000003187	663	151	153	148	318	354	192	262	208	160	308	232	71	219	465	218
ENSRNOG00000003189	74	40	28	47	20	31	12	87	18	25	26	51	50	43	90	18
ENSRNOG00000003191	827	300	170	151	280	491	296	430	202	179	437	185	145	287	617	238
ENSRNOG00000003192	23	10	13	29	3	11	5	16	16	12	11	30	0	7	81	13
ENSRNOG00000003194	2	0	8	0	3	1	2	0	0	3	0	0	0	0	0	0
ENSRNOG00000003195	6683	4401	4694	5737	4882	4760	2896	4968	5517	5407	5413	6090	6679	3594	4285	4162
ENSRNOG00000003198	7913	3115	4455	5300	5014	4857	2785	2934	4611	4971	4701	5446	4123	3507	6448	3892
ENSRNOG00000003201	6108	3821	2106	2330	2652	3738	2312	3254	2334	2286	3193	2181	388	2413	5740	2212
ENSRNOG00000003203	1785	1054	811	1364	1190	1264	727	1036	1081	1051	1234	1414	1817	752	1294	771
ENSRNOG00000003205	1125	319	632	388	1167	561	407	465	628	716	706	700	390	546	755	615
ENSRNOG00000003206	5930	2708	2779	2987	3762	3792	2643	3110	3211	3099	3706	3551	3430	2927	4553	2554
ENSRNOG00000003207	4832	2359	2787	3345	2860	3744	1585	1722	3200	3216	2911	3414	3728	1993	3939	1916
ENSRNOG00000003208	13	7	7	3	10	9	1	9	5	7	10	1	0	3	11	1
ENSRNOG00000003209	5112	1196	540	1572	1259	1355	620	1271	1530	810	1713	2556	2117	1913	2796	1792
ENSRNOG00000003210	3	0	0	0	0	0	0	5	0	0	0	0	0	0	0	0
ENSRNOG00000003211	1183	472	354	436	395	866	476	590	325	340	732	487	543	469	1149	324
ENSRNOG00000003213	488	389	402	582	668	313	255	377	541	256	258	617	325	291	292	559
ENSRNOG00000003214	329	190	147	176	154	241	141	247	136	186	237	229	131	159	253	147
ENSRNOG00000003215	444	202	175	192	243	264	176	288	236	203	372	186	81	237	337	160
ENSRNOG00000003217	413	360	113	258	210	199	127	327	264	206	258	439	335	193	404	165
ENSRNOG00000003218	210	137	68	97	129	114	45	183	83	59	194	143	55	138	162	105
ENSRNOG00000003219	69	42	28	62	37	45	7	67	34	24	50	36	39	9	43	20
ENSRNOG00000003220	4700	2121	1420	2393	1988	2946	1431	2539	2157	1691	2502	3197	2306	1754	3611	1688
ENSRNOG00000003221	6	3	3	0	1	0	0	10	2	0	4	0	0	2	7	2
ENSRNOG00000003223	1790	689	619	1004	923	723	441	775	877	606	578	1284	812	654	1148	649
ENSRNOG00000003224	2028	726	803	1103	908	1077	441	680	1088	997	936	1343	1345	889	1392	722
ENSRNOG00000003225	501	175	100	131	136	299	154	225	100	138	254	174	128	114	425	138
ENSRNOG00000003226	7338	5733	6068	7671	7548	6296	3938	5254	7978	5982	6352	8230	6586	5142	5850	6231
ENSRNOG00000003227	0	0	0	0	0	0	0	0	0	0	0	0	0	0	0	0
ENSRNOG00000003228	3443	2094	1082	2101	1350	1609	1150	2256	1442	1413	1464	2479	2078	1081	2394	1144
ENSRNOG00000003229	35204	12929	11732	16491	14171	16692	9373	11327	13963	12144	13743	19508	10974	10232	27834	11245
ENSRNOG00000003232	1874	1450	969	1698	999	1427	993	1244	1342	1012	1193	1800	1699	855	1653	1057
ENSRNOG00000003233	9	5	5	3	4	6	1	7	3	11	5	5	7	4	8	0
ENSRNOG00000003234	7095	4659	4283	5978	4629	4636	2787	3863	5421	4650	4599	6483	5189	3602	5741	4251
ENSRNOG00000003235	2344	1036	1124	1388	1325	1568	630	1010	1386	1355	1393	1535	1683	1009	1840	959
ENSRNOG00000003237	1738	1122	833	1197	1207	1167	688	1339	1238	971	1206	1668	972	817	1430	885
ENSRNOG00000003239	1331	737	766	866	962	830	460	751	1006	776	872	1356	1190	685	904	675
ENSRNOG00000003241	2163	1032	1541	887	1708	1174	1063	968	1022	1002	1089	829	109	1076	1545	1141
ENSRNOG00000003242	328	65	33	39	48	181	98	151	55	23	132	75	50	53	200	44
ENSRNOG00000003243	934	654	579	692	759	610	316	497	749	708	547	734	936	560	670	616
ENSRNOG00000003244	62	50	26	41	19	49	7	42	38	34	35	34	39	19	97	18
ENSRNOG00000003245	29	4	4	0	7	4	0	2	5	3	1	16	3	4	13	3
ENSRNOG00000003246	2	0	0	2	0	2	1	3	2	0	1	6	0	0	6	0
ENSRNOG00000003247	642	344	267	465	483	383	280	361	429	386	419	588	388	302	472	348
ENSRNOG00000003248	1550	746	591	602	713	678	417	704	683	658	748	946	872	641	1188	592
ENSRNOG00000003251	971	181	300	75	433	485	301	333	143	206	612	75	9	366	597	224
ENSRNOG00000003253	7677	5305	3165	6997	5076	4276	2846	4701	4958	3519	3658	7106	6650	3106	5065	3197
ENSRNOG00000003254	36	27	11	5	20	18	5	24	10	18	11	17	18	24	37	5
ENSRNOG00000003256	6499	2554	2944	3037	3382	5713	3042	3248	2840	2807	5146	2860	1661	2967	5518	2566
ENSRNOG00000003258	268	142	166	126	300	148	181	165	155	102	156	238	132	159	172	130
ENSRNOG00000003259	296	185	106	167	135	152	113	121	167	113	140	261	192	178	235	142
ENSRNOG00000003260	674	318	296	318	388	483	185	297	392	373	448	448	192	272	504	309
ENSRNOG00000003261	7025	2724	2898	1567	4703	3806	3429	4445	1690	1812	3666	1619	1081	3657	4388	2255
ENSRNOG00000003262	1465	975	668	867	938	963	545	941	1152	865	858	1324	1390	895	781	722
ENSRNOG00000003263	7	2	0	0	6	3	2	0	0	0	6	0	16	5	4	0
ENSRNOG00000003264	561	374	291	295	259	362	208	229	363	302	319	440	460	274	534	288
ENSRNOG00000003266	58	44	11	51	14	22	6	28	47	37	26	52	54	12	56	43
ENSRNOG00000003267	812	379	242	459	364	439	174	468	362	326	337	554	555	289	603	297
ENSRNOG00000003268	335	233	240	293	326	239	132	204	269	256	226	378	373	172	286	202
ENSRNOG00000003269	591	342	190	290	253	409	197	302	299	259	379	459	244	195	506	209
ENSRNOG00000003272	69	34	40	46	50	40	26	26	60	49	50	68	54	39	47	37
ENSRNOG00000003273	24	6	9	7	6	3	14	20	18	14	19	20	29	7	18	12
ENSRNOG00000003275	11	6	23	16	8	4	9	2	13	11	3	10	5	5	7	6
ENSRNOG00000003276	1212	708	544	627	964	631	324	1017	585	553	488	931	835	511	673	480
ENSRNOG00000003278	460	250	232	322	218	335	206	211	290	220	309	401	502	219	399	218
ENSRNOG00000003279	167	39	35	12	28	75	34	56	18	28	65	8	0	40	103	17
ENSRNOG00000003280	3821	3338	2112	2749	1671	3430	1616	3074	2899	2962	3673	3306	2587	1728	2513	2148
ENSRNOG00000003281	349	215	155	240	221	224	98	258	211	178	198	267	197	159	246	199
ENSRNOG00000003283	222	142	64	129	98	147	61	112	101	123	133	144	117	89	196	132
ENSRNOG00000003284	54	50	46	77	45	70	29	15	50	26	22	57	78	21	29	31
ENSRNOG00000003285	134	128	105	134	168	91	69	115	123	99	96	135	222	71	68	144
ENSRNOG00000003287	19	9	14	20	34	5	13	9	21	37	7	24	11	10	15	13
ENSRNOG00000003288	237	101	76	198	135	138	66	150	186	96	112	251	243	155	281	183
ENSRNOG00000003289	2077	1102	602	1118	952	1179	663	1160	901	747	1040	1364	933	671	1450	761
ENSRNOG00000003290	2495	1759	1950	2144	3146	1386	953	1519	2549	1607	1417	2490	1655	1763	1492	2209
ENSRNOG00000003291	798	364	321	445	299	430	258	637	458	273	444	577	417	337	538	296
ENSRNOG00000003294	0	0	0	0	0	0	0	0	0	0	0	0	0	0	0	0
ENSRNOG00000003296	1711	637	1052	1335	796	1433	905	595	933	861	1394	948	874	573	1335	548
ENSRNOG00000003298	2	0	1	0	4	0	0	0	0	1	0	0	0	0	3	0
ENSRNOG00000003299	1	0	3	2	9	1	0	2	0	5	3	4	0	0	2	4
ENSRNOG00000003300	272	165	142	203	252	155	178	147	179	327	327	509	392	158	288	187
ENSRNOG00000003302	1650	887	787	1225	1120	993	497	765	1110	888	934	1435	1285	679	1162	798
ENSRNOG00000003303	0	0	0	0	0	0	0	0	0	0	0	0	0	0	0	0
ENSRNOG00000003304	20	38	11	10	1	4	9	12	10	5	12	8	14	8	9	5
ENSRNOG00000003305	1	1	1	0	0	0	1	0	0	0	0	5	1	0	7	0
ENSRNOG00000003307	1488	925	639	904	846	892	489	1119	797	839	789	1016	728	607	1028	636
ENSRNOG00000003310	448	423	131	283	335	248	93	372	238	197	212	376	383	193	286	232
ENSRNOG00000003312	2110	1444	818	1081	1037	994	883	1262	1099	1012	547	765	865	722	1836	733
ENSRNOG00000003313	205	73	74	24	161	79	57	141	64	51	80	85	17	154	90	65
ENSRNOG00000003315	1609	563	493	563	716	813	412	703	536	452	730	751	404	555	1232	455
ENSRNOG00000003324	3	0	0	3	1	1	2	6	7	1	0	2	0	3	4	4
ENSRNOG00000003326	441	385	259	219	452	334	201	333	291	182	259	429	173	332	380	247
ENSRNOG00000003327	0	0	0	0	0	0	0	0	0	0	0	0	0	0	0	0
ENSRNOG00000003328	6983	2998	3230	4422	3817	3837	1884	3019	3935	3502	3244	4977	3325	2752	5915	2894
ENSRNOG00000003329	528	330	215	248	343	296	193	284	298	180	224	337	314	195	374	254
ENSRNOG00000003330	2521	1383	939	1658	1033	1470	874	1636	1318	974	1217	1708	1306	853	1864	927
ENSRNOG00000003332	466	197	242	281	259	256	153	231	366	233	282	400	289	229	485	274
ENSRNOG00000003334	659	385	295	462	408	394	218	330	429	432	357	676	644	348	580	270
ENSRNOG00000003336	1894	1239	1446	1703	1647	1963	872	1294	1764	1697	1681	1654	1373	1080	1997	879
ENSRNOG00000003338	1137	516	295	547	493	574	309	542	358	337	429	720	401	305	756	268
ENSRNOG00000003341	796	269	314	398	405	429	143	446	476	417	368	561	562	305	689	357
ENSRNOG00000003342	0	0	0	0	0	0	0	0	0	0	0	0	0	0	0	0
ENSRNOG00000003343	16904	6823	6370	5087	8949	10349	7728	11143	5434	5238	10029	5431	2569	6436	12387	5776
ENSRNOG00000003345	0	0	0	0	0	0	0	0	0	0	0	0	0	0	0	0
ENSRNOG00000003346	46	4	2	0	10	14	10	15	0	7	14	3	0	14	27	6
ENSRNOG00000003347	0	0	0	0	0	0	0	0	0	0	0	0	0	0	0	0
ENSRNOG00000003348	549	211	200	346	325	366	111	213	209	232	280	438	352	230	654	279
ENSRNOG00000003349	40	40	22	34	40	24	17	47	47	28	46	45	37	28	47	19
ENSRNOG00000003350	329	126	56	111	93	145	92	217	52	51	198	75	10	86	207	36
ENSRNOG00000003354	5	6	2	3	3	3	1	5	8	5	3	3	0	7	2	12
ENSRNOG00000003355	0	0	0	0	0	0	0	0	0	0	0	0	0	0	0	0
ENSRNOG00000003357	572	1458	312	608	421	626	371	150	458	387	581	495	497	235	932	482
ENSRNOG00000003359	5490	1800	1668	1525	2186	2266	1416	1858	1440	1351	2499	1468	597	1609	3521	1471
ENSRNOG00000003365	11816	7029	9730	11499	10609	9492	5590	4936	11299	9569	8335	12389	12186	7516	9384	8505
ENSRNOG00000003367	59	22	11	14	24	43	19	61	10	42	41	31	7	20	64	27
ENSRNOG00000003368	3349	1773	1827	1993	2444	1908	1389	2451	2067	1936	1730	2362	1649	1886	2202	1687
ENSRNOG00000003370	5	5	2	0	5	0	1	8	0	0	5	2	0	7	3	5
ENSRNOG00000003374	322	206	326	321	327	242	176	191	323	238	234	366	373	233	200	250
ENSRNOG00000003377	0	0	0	0	0	0	0	0	0	0	0	0	0	0	0	0
ENSRNOG00000003384	8	35	2	18	27	3	2	6	6	4	7	16	11	4	33	19
ENSRNOG00000003385	2410	877	662	684	869	1561	851	1087	882	611	1515	1021	1065	1047	2155	715
ENSRNOG00000003386	4117	1975	2636	3815	2167	3031	1441	1235	2796	2562	2437	3315	4430	1516	3311	1820
ENSRNOG00000003387	259	162	105	197	172	181	76	136	190	139	142	213	278	89	166	113
ENSRNOG00000003388	64	46	8	10	45	20	6	48	4	30	35	33	9	25	23	24
ENSRNOG00000003392	3147	1339	1153	1211	1424	1803	982	1360	1175	1251	1525	1424	693	1164	2431	907
ENSRNOG00000003395	17	0	18	23	15	9	3	17	9	14	7	7	21	4	12	10
ENSRNOG00000003397	366	155	157	146	251	233	115	147	175	207	173	229	195	145	285	168
ENSRNOG00000003398	910	706	607	811	954	799	462	649	778	751	802	840	814	592	689	591
ENSRNOG00000003399	4510	1693	1480	1702	2255	2578	1566	2352	1481	1377	2629	2209	1848	1659	3385	1422
ENSRNOG00000003400	63	38	3	22	18	22	16	12	23	7	34	44	0	7	32	5
ENSRNOG00000003401	19	5	13	8	8	6	9	5	5	1	13	14	8	16	11	5
ENSRNOG00000003402	3952	2221	2444	3403	2911	2612	1458	2054	2863	2553	2647	3336	2883	1961	3022	2194
ENSRNOG00000003403	445	208	213	186	180	283	159	259	176	171	234	221	119	173	385	194
ENSRNOG00000003404	0	0	0	0	0	0	0	0	0	0	0	0	0	0	0	0
ENSRNOG00000003407	120	173	105	140	148	98	79	71	162	70	113	221	201	159	136	136
ENSRNOG00000003409	3	0	1	4	3	0	0	3	1	7	2	11	6	1	3	3
ENSRNOG00000003419	807	503	539	686	645	583	301	372	751	475	451	748	634	475	640	510
ENSRNOG00000003424	1067	631	602	772	695	643	333	521	757	654	626	843	743	492	849	535
ENSRNOG00000003426	1410	978	1033	1426	1411	869	587	791	1233	870	866	1471	1148	806	1003	1159
ENSRNOG00000003428	3829	1905	1975	1893	2697	2501	1698	2865	2070	1613	2721	2321	1075	2280	2897	1904
ENSRNOG00000003430	0	0	0	0	0	0	0	0	0	0	0	0	0	0	0	0
ENSRNOG00000003434	461	246	211	213	347	201	225	360	219	122	261	377	136	179	267	211
ENSRNOG00000003435	89	24	47	59	33	59	34	38	11	46	48	23	0	38	51	22
ENSRNOG00000003439	37	9	17	12	4	12	13	24	0	12	18	24	10	5	31	13
ENSRNOG00000003441	2	0	0	0	0	0	0	0	0	0	0	0	0	1	1	0
ENSRNOG00000003442	3678	3151	3193	5055	3600	3497	2075	2837	4181	3283	3112	4637	3934	2404	2995	2580
ENSRNOG00000003443	35	43	16	22	28	19	22	38	32	28	33	41	57	17	23	13
ENSRNOG00000003452	21	1	13	15	10	3	13	4	3	11	18	18	6	3	16	8
ENSRNOG00000003453	1342	510	342	307	940	434	278	637	682	473	440	949	794	815	432	528
ENSRNOG00000003455	510	304	248	359	316	320	162	268	329	324	302	391	441	244	331	261
ENSRNOG00000003456	0	0	0	0	0	0	0	0	0	0	0	0	0	0	0	0
ENSRNOG00000003457	1	0	0	0	0	0	0	0	0	0	0	0	7	0	0	1
ENSRNOG00000003461	1062	492	381	503	589	645	381	523	467	523	603	528	412	431	855	429
ENSRNOG00000003463	4112	2687	1425	2733	2026	2046	1250	2833	2247	2051	1992	3471	2756	1444	2002	1572
ENSRNOG00000003464	2746	1631	1574	1862	2219	1718	890	1352	2116	1715	1491	2751	2110	1420	2434	1962
ENSRNOG00000003466	6058	4870	5866	7572	6256	4892	3429	3388	6906	5586	5311	7131	6692	3611	4008	5498
ENSRNOG00000003468	0	0	4	2	0	0	0	3	0	0	0	0	0	0	0	0
ENSRNOG00000003469	2578	1481	1700	2012	2115	1776	820	1462	1923	2222	1834	2273	2569	1409	1957	1572
ENSRNOG00000003470	842	219	225	182	258	463	344	510	243	204	446	337	91	256	691	157
ENSRNOG00000003472	356	19	28	29	38	178	114	276	11	31	128	69	14	80	189	19
ENSRNOG00000003476	3	0	3	0	0	1	1	4	7	5	1	2	0	5	0	1
ENSRNOG00000003479	472	264	476	580	648	344	246	213	548	388	307	566	504	390	334	499
ENSRNOG00000003480	20	3	0	4	9	14	2	11	1	7	6	4	0	9	18	2
ENSRNOG00000003486	1	0	0	0	0	5	5	2	0	0	1	0	0	0	4	0
ENSRNOG00000003491	1895	1383	1483	2018	1997	1327	994	1163	1841	936	1096	2263	1534	1385	1241	1901
ENSRNOG00000003493	62	54	77	32	134	18	17	46	42	25	48	46	14	59	20	64
ENSRNOG00000003494	2261	1568	970	1587	1281	1390	920	1521	1803	1394	1241	1724	2319	1530	1181	999
ENSRNOG00000003495	7132	4122	4651	5672	6935	3861	2739	3893	6155	3676	3738	6181	3409	4310	4899	5527
ENSRNOG00000003496	2737	1317	1831	2222	2673	1664	1110	1585	2313	1404	1646	2761	1838	1634	2288	2079
[truncated: 24,690 more rows]
